# Supplementary material for: ZnCl2-mediated stereo- and chemoselective synthesis of vinylphosphonates
Source: Royal Society of Chemistry journal article supplement (doi:10.1039/d2ob00037g), 2022-01-01
Supplement: d2ob00037g1.pdf [file d2ob00037g1.pdf]

## Supporting Information

### **ZnCl<sub>2</sub>-Mediated Stereo- and Chemoselective Synthesis of Vinyl Phosphonates**

Babak Kaboudin,<sup>\*a</sup> Atieh Moradi,<sup>a</sup> Hesam Esfandiari,<sup>a</sup> Payam Daliri,<sup>a</sup> Foad Kazemi,<sup>a</sup> Hikaru Yanai,<sup>\*b</sup> and Hiroshi Aoyama<sup>b</sup>

<sup>a</sup>Department of Chemistry, Institute for Advanced Studies in Basic Sciences (IASBS), Gava Zang, Zanjan 45137-66731, Iran

<sup>b</sup>School of Pharmacy, Tokyo University of Pharmacy and Life Sciences, 1432-1 Horinouchi, Hachioji, Tokyo 192-0392, Japan

Fax: +98 24 33153220, E-mail: kaboudin@gmail.com

### Table of Contents

|                                                    |               |
|----------------------------------------------------|---------------|
| <b>NMR Spectra for the compounds 2a-2o and 4a</b>  | <b>S4-S58</b> |
| <b>Figure S1: <sup>1</sup>H NMR Spectra of 2a</b>  |               |
| <b>Figure S2: <sup>13</sup>C NMR Spectra of 2a</b> |               |
| <b>Figure S3: <sup>31</sup>P NMR Spectra of 2a</b> |               |
| <b>Figure S4: <sup>1</sup>H NMR Spectra of 2b</b>  |               |
| <b>Figure S5: <sup>13</sup>C NMR Spectra of 2b</b> |               |
| <b>Figure S6: <sup>31</sup>P NMR Spectra of 2b</b> |               |
| <b>Figure S7: <sup>1</sup>H NMR Spectra of 2c</b>  |               |
| <b>Figure S8: <sup>13</sup>C NMR Spectra of 2c</b> |               |

**Figure S9:  $^{31}\text{P}$  NMR Spectra of 2c**

**Figure S10:  $^1\text{H}$  NMR Spectra of 2d**

**Figure S11:  $^{13}\text{C}$  NMR Spectra of 2d**

**Figure S12:  $^{31}\text{P}$  NMR Spectra of 2d**

**Figure S13:  $^1\text{H}$  NMR Spectra of 2e**

**Figure S14:  $^{13}\text{C}$  NMR Spectra of 2e**

**Figure S15:  $^{31}\text{P}$  NMR Spectra of 2e**

**Figure S16:  $^1\text{H}$  NMR Spectra of 2f**

**Figure S17:  $^{13}\text{C}$  NMR Spectra of 2f**

**Figure S18:  $^{31}\text{P}$  NMR Spectra of 2f**

**Figure S19:  $^1\text{H}$  NMR Spectra of 2g**

**Figure S20:  $^{13}\text{C}$  NMR Spectra of 2g**

**Figure S21:  $^{31}\text{P}$  NMR Spectra of 2g**

**Figure S22:  $^1\text{H}$  NMR Spectra of 2h**

**Figure S23:  $^{13}\text{C}$  NMR Spectra of 2h**

**Figure S24:  $^{31}\text{P}$  NMR Spectra of 2h**

**Figure S25:  $^1\text{H}$  NMR Spectra of 2i**

**Figure S26:  $^{13}\text{C}$  NMR Spectra of 2i**

**Figure S27:  $^{31}\text{P}$  NMR Spectra of 2i**

**Figure S28:  $^1\text{H}$  NMR Spectra of 2j**

**Figure S29:  $^{13}\text{C}$  NMR Spectra of 2j**

**Figure S30:  $^{31}\text{P}$  NMR Spectra of 2j**

**Figure S31:  $^1\text{H}$  NMR Spectra of 2k**

**Figure S32:  $^{13}\text{C}$  NMR Spectra of 2k**

**Figure S33:  $^{31}\text{P}$  NMR Spectra of 2k**

**Figure S34:  $^1\text{H}$  NMR Spectra of 2l**

**Figure S35:  $^{13}\text{C}$  NMR Spectra of 2l**

**Figure S36:  $^{31}\text{P}$  NMR Spectra of 2l**

**Figure S37:  $^1\text{H}$  NMR Spectra of 2m**

**Figure S38:  $^{13}\text{C}$  NMR Spectra of 2m**

**Figure S39:  $^{31}\text{P}$  NMR Spectra of 2m**

**Figure S40:  $^1\text{H}$  NMR Spectra of 2n**

**Figure S41:  $^{13}\text{C}$  NMR Spectra of 2n**

**Figure S42:  $^{31}\text{P}$  NMR Spectra of 2n**

**Figure S43:  $^1\text{H}$  NMR Spectra of 2o**

**Figure S44:  $^{13}\text{C}$  NMR Spectra of 2o**

**Figure S45:  $^{31}\text{P}$  NMR Spectra of 2o**

**Figure S46:  $^1\text{H}$  NMR Spectra of 2p**

**Figure S47:  $^{13}\text{C}$  NMR Spectra of 2p**

**Figure S48:  $^{31}\text{P}$  NMR Spectra of 2p**

**Figure S49:  $^1\text{H}$  NMR Spectra of 4a**

**Figure S50:  $^{13}\text{C}$  NMR Spectra of 4a**

**Figure S51:  $^{31}\text{P}$  NMR Spectra of 4a**

**Figure S52: HR Mass data for the unstable compound 2q**

**Figure S53:  $^{31}\text{P}$  NMR Spectra of 4b (a mixture of E and Z ~50:50)**

**Figure S53:  $^1\text{H}$  NMR Spectra of 4b (a mixture of E and Z ~50:50)**

**DFT calculations and Tables**

**S59-S107**

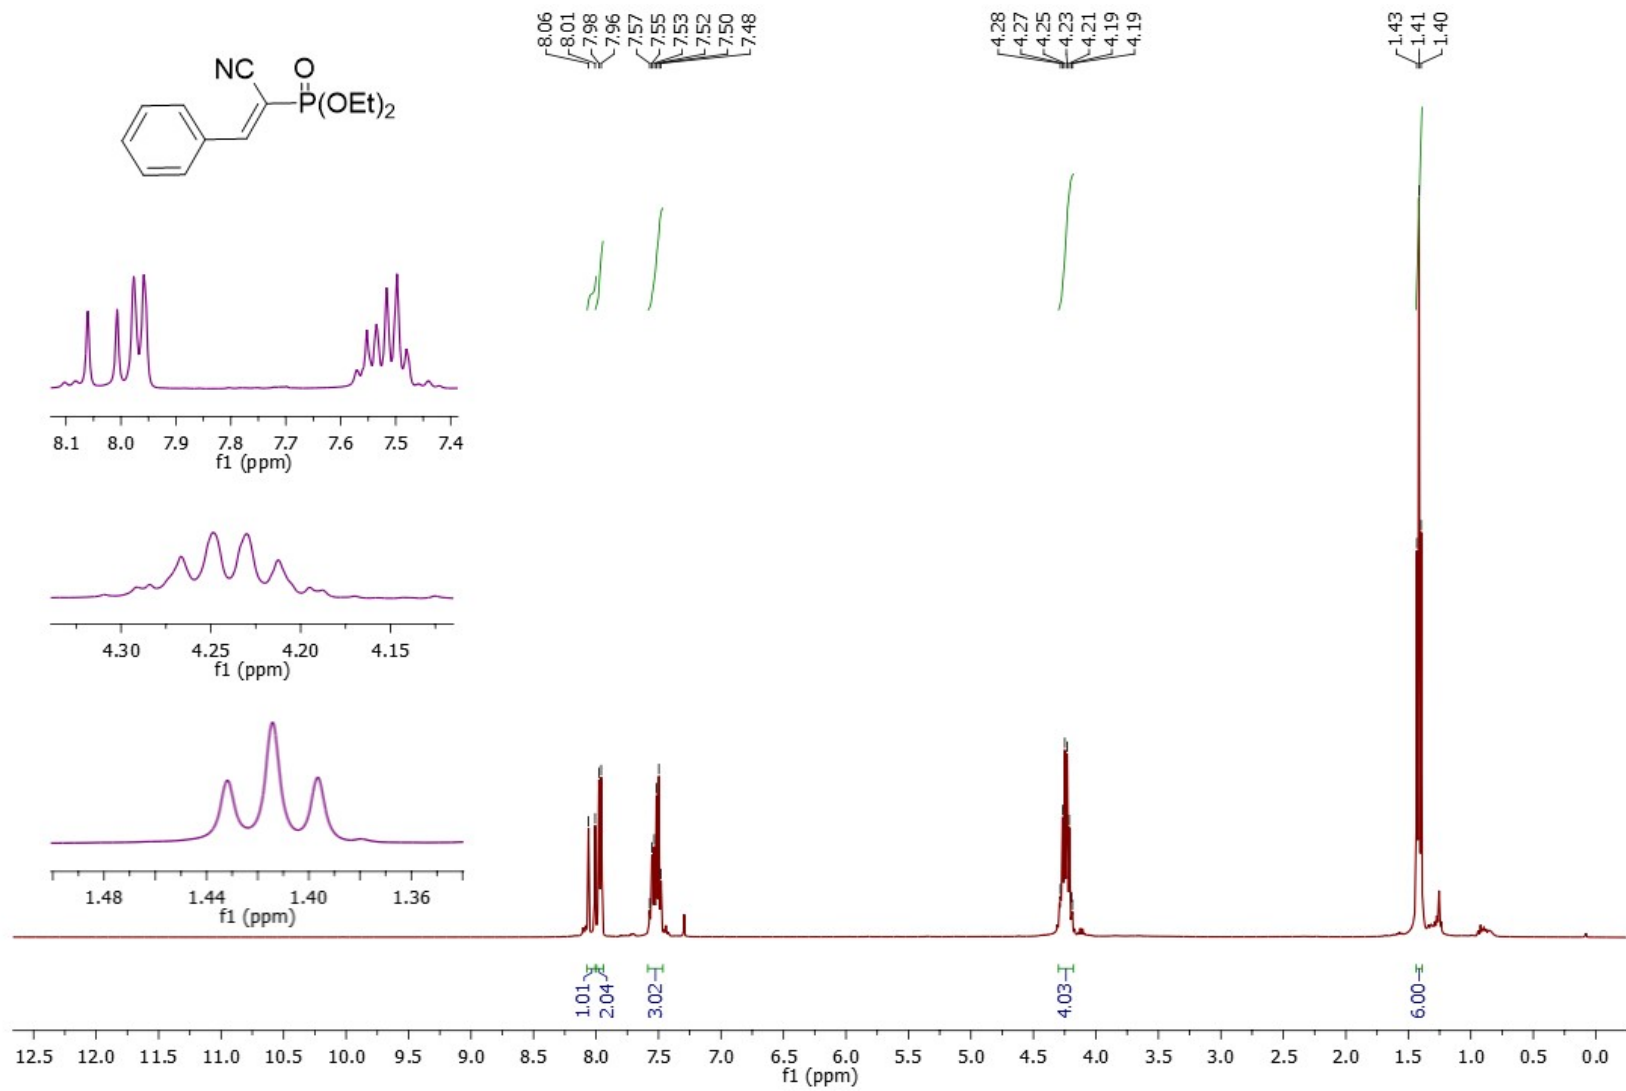

Figure S1: <sup>1</sup>H NMR Spectra of 2a

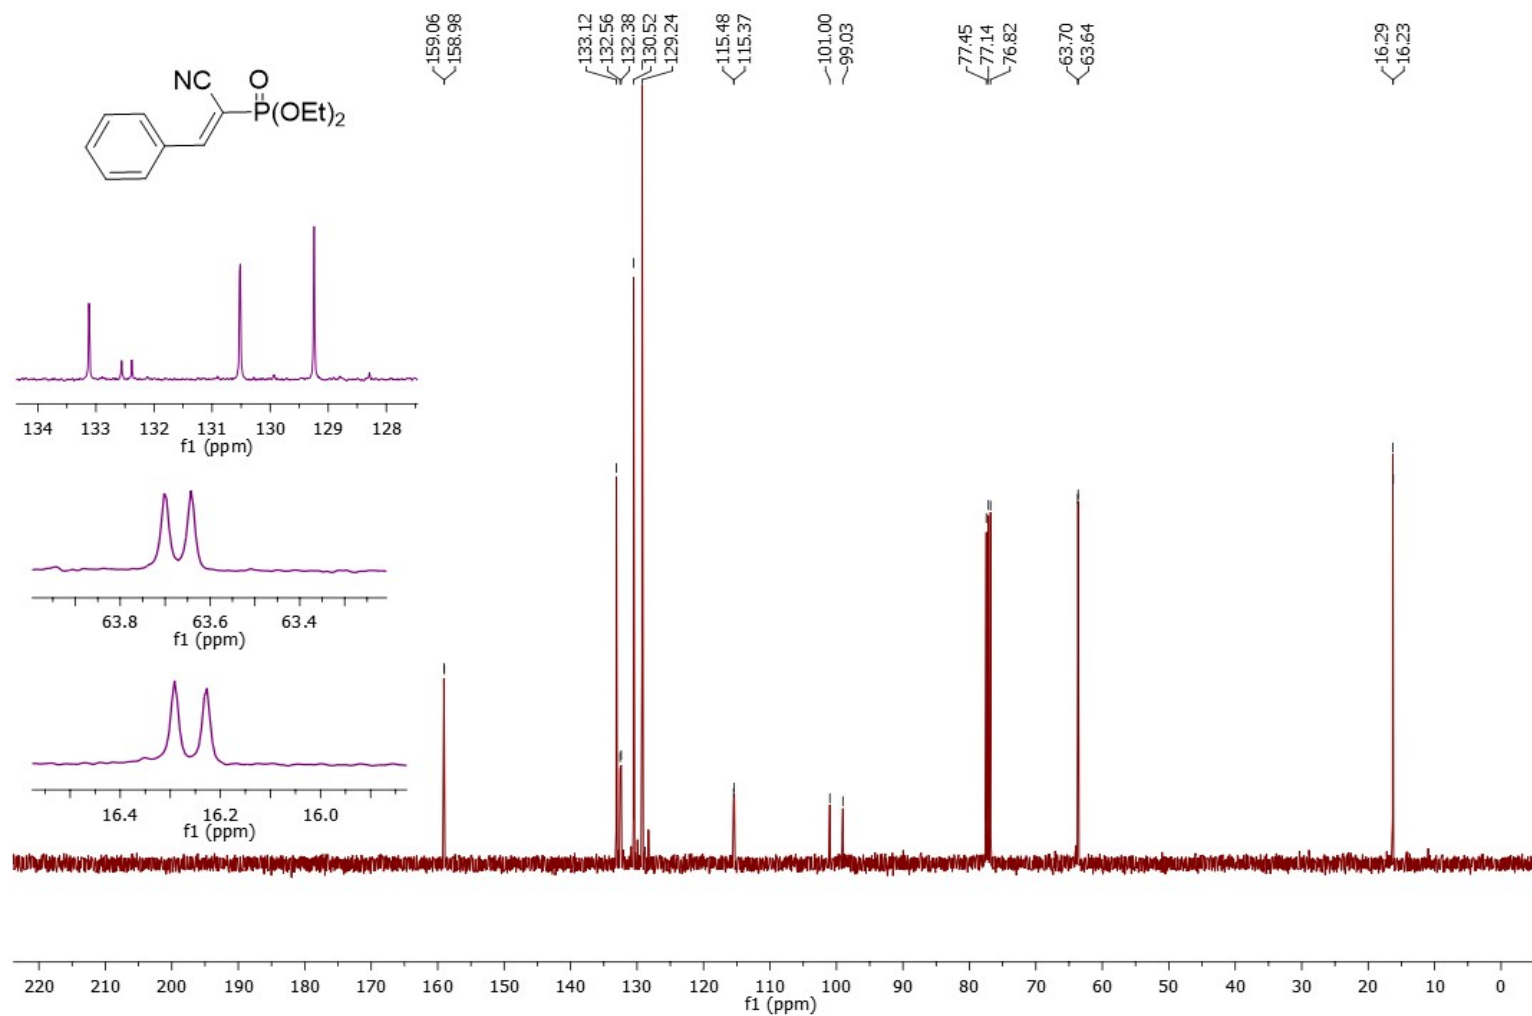

Figure S2:  $^{13}\text{C}$ -NMR Spectra of 2a

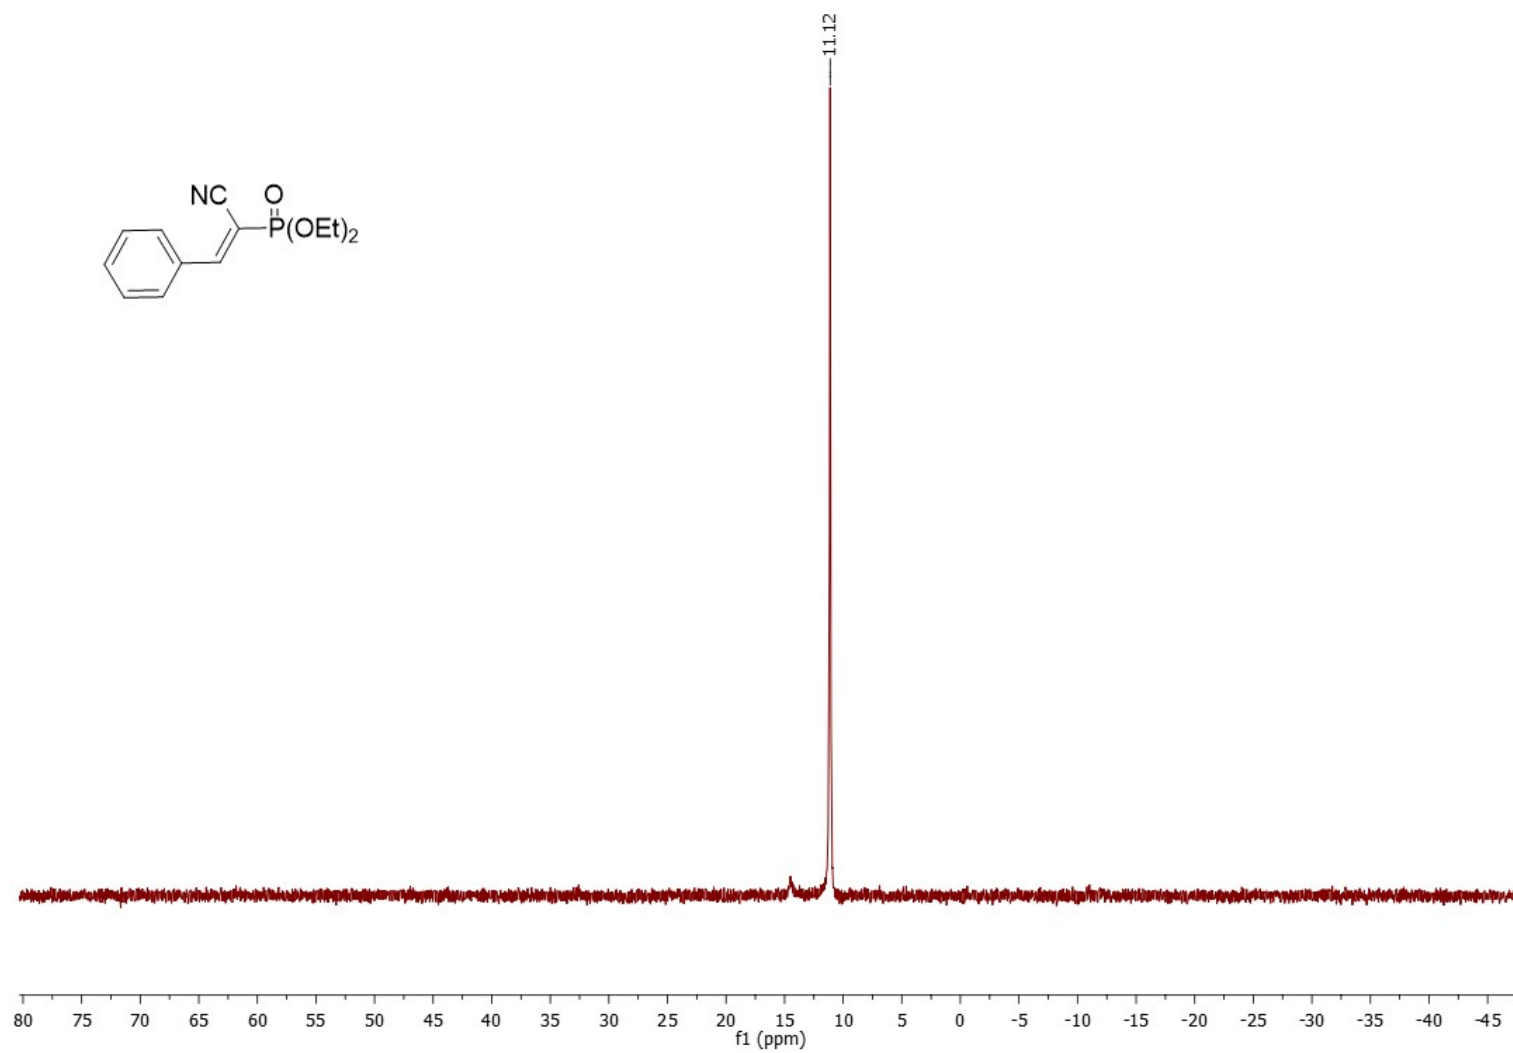

Figure S3:  $^{31}\text{P}$ NMR Spectra of 2a

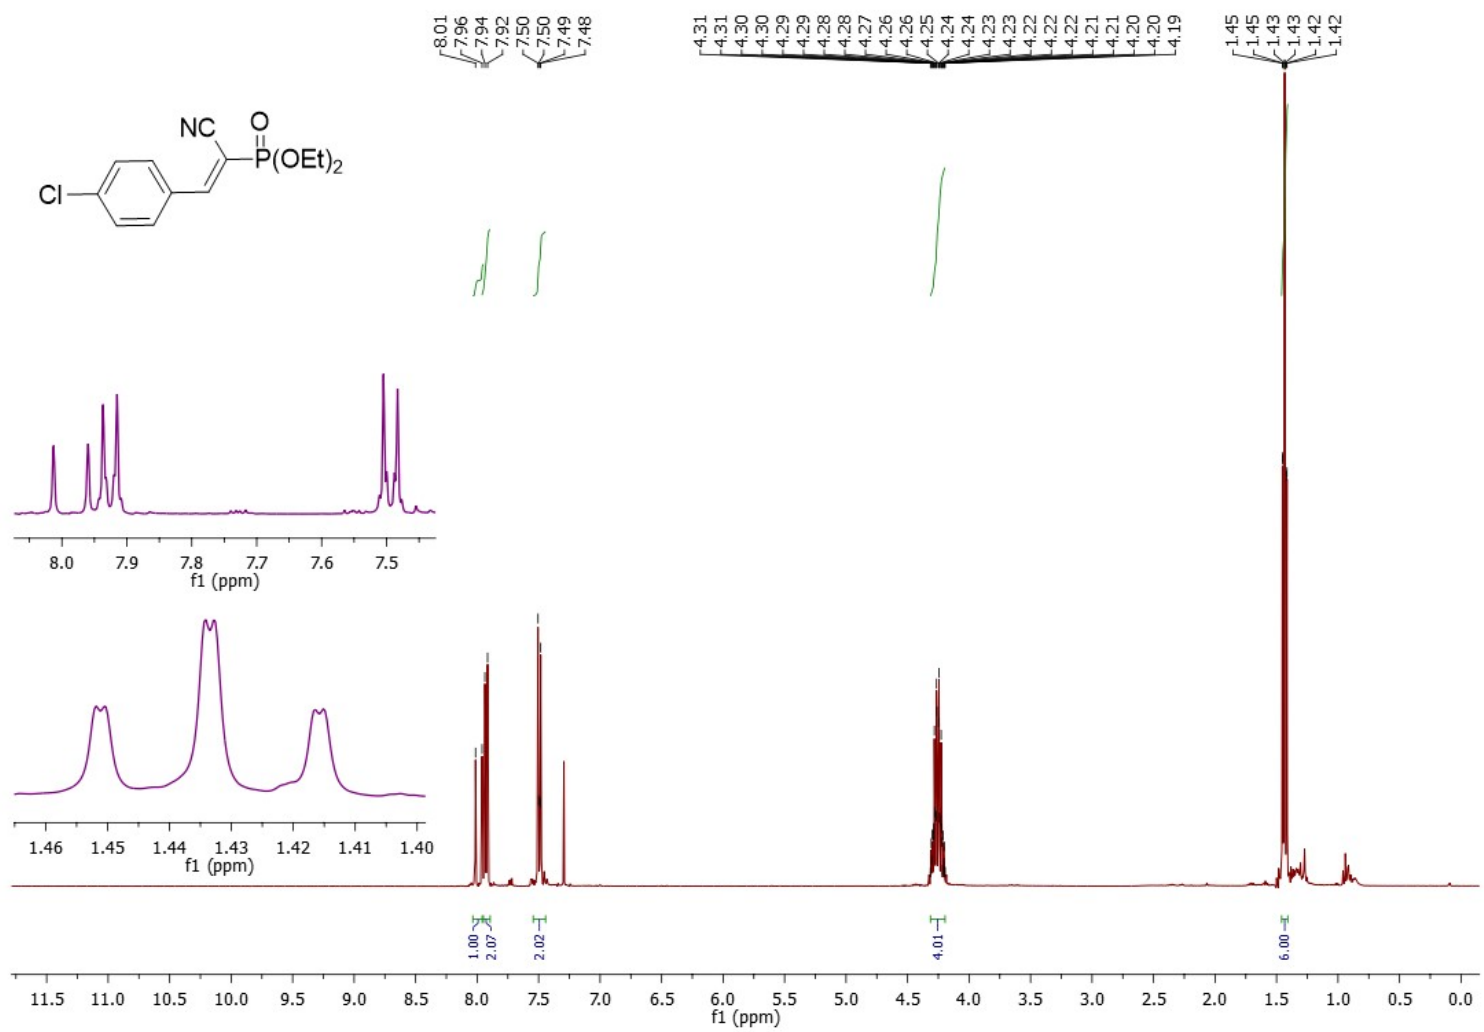

Figure S4: <sup>1</sup>H NMR Spectra of 2b



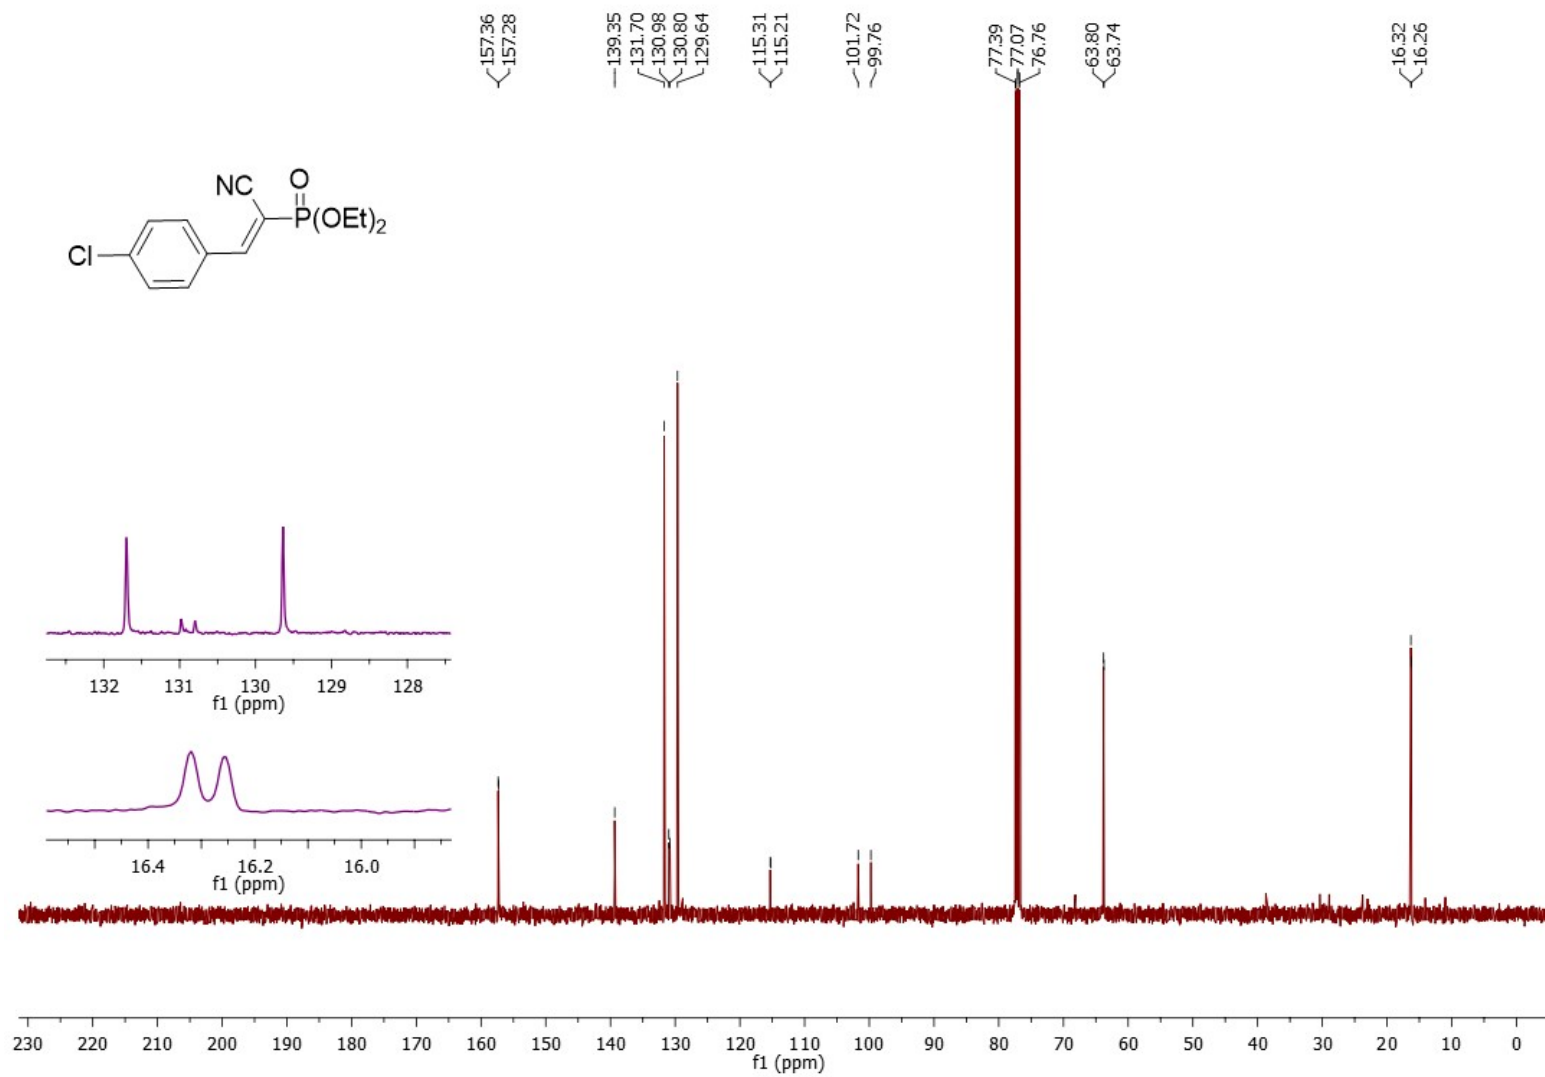

Figure S5: <sup>13</sup>C NMR Spectra of 2b

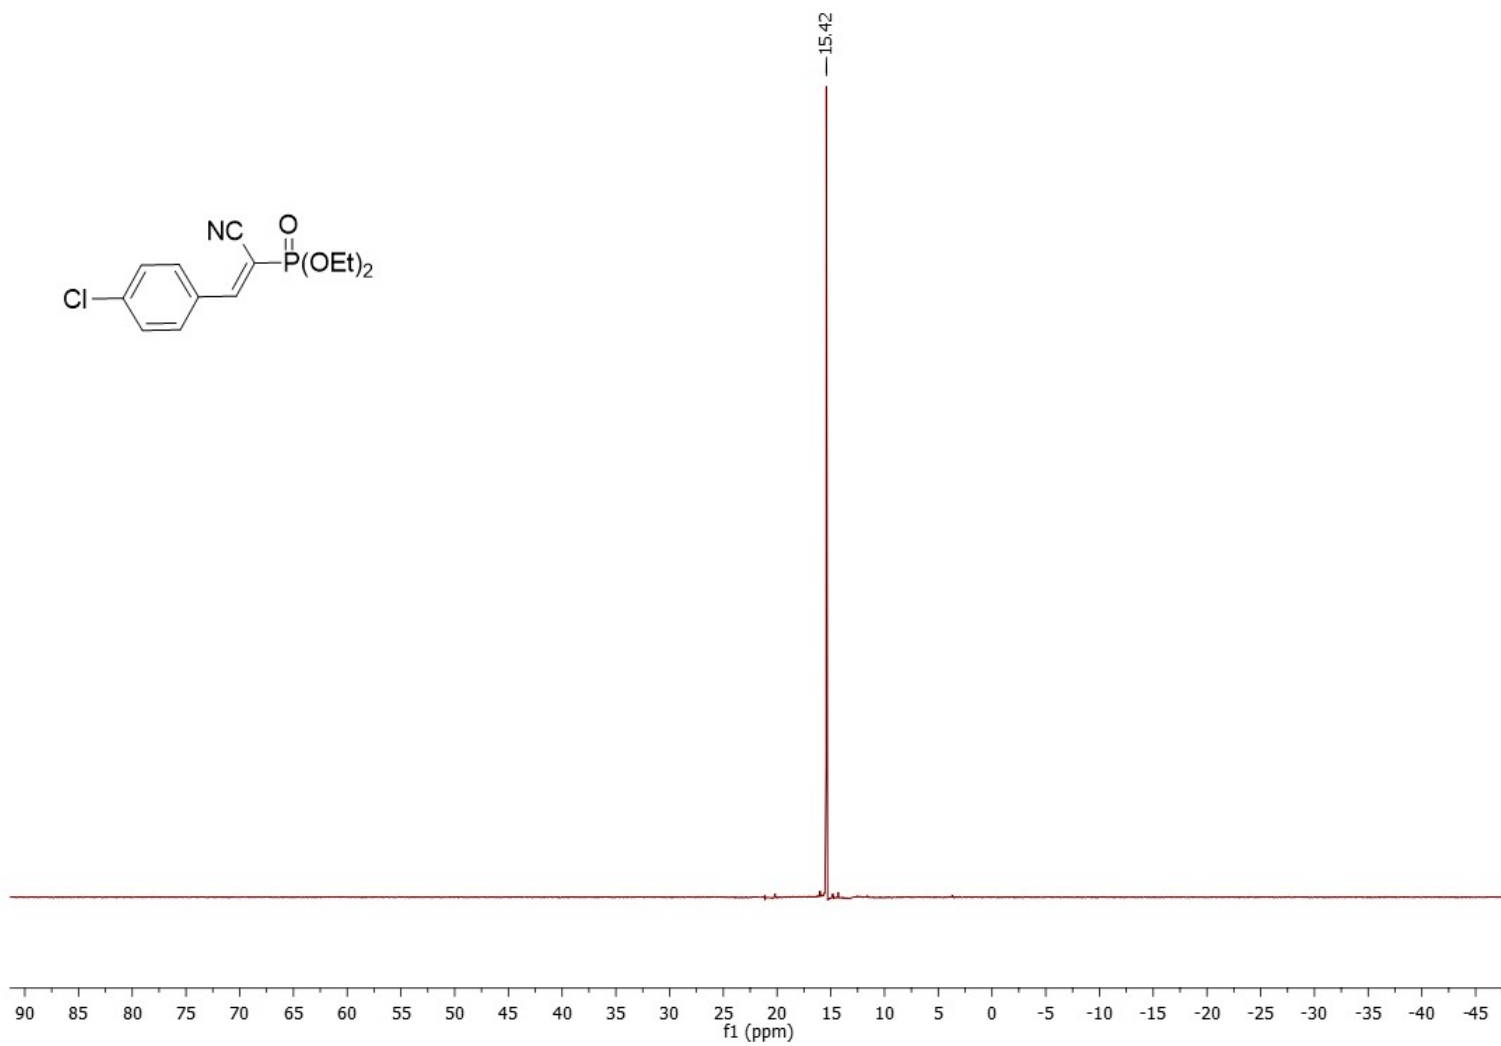

Figure S6:  $^{31}\text{P}$  NMR Spectra of 2b

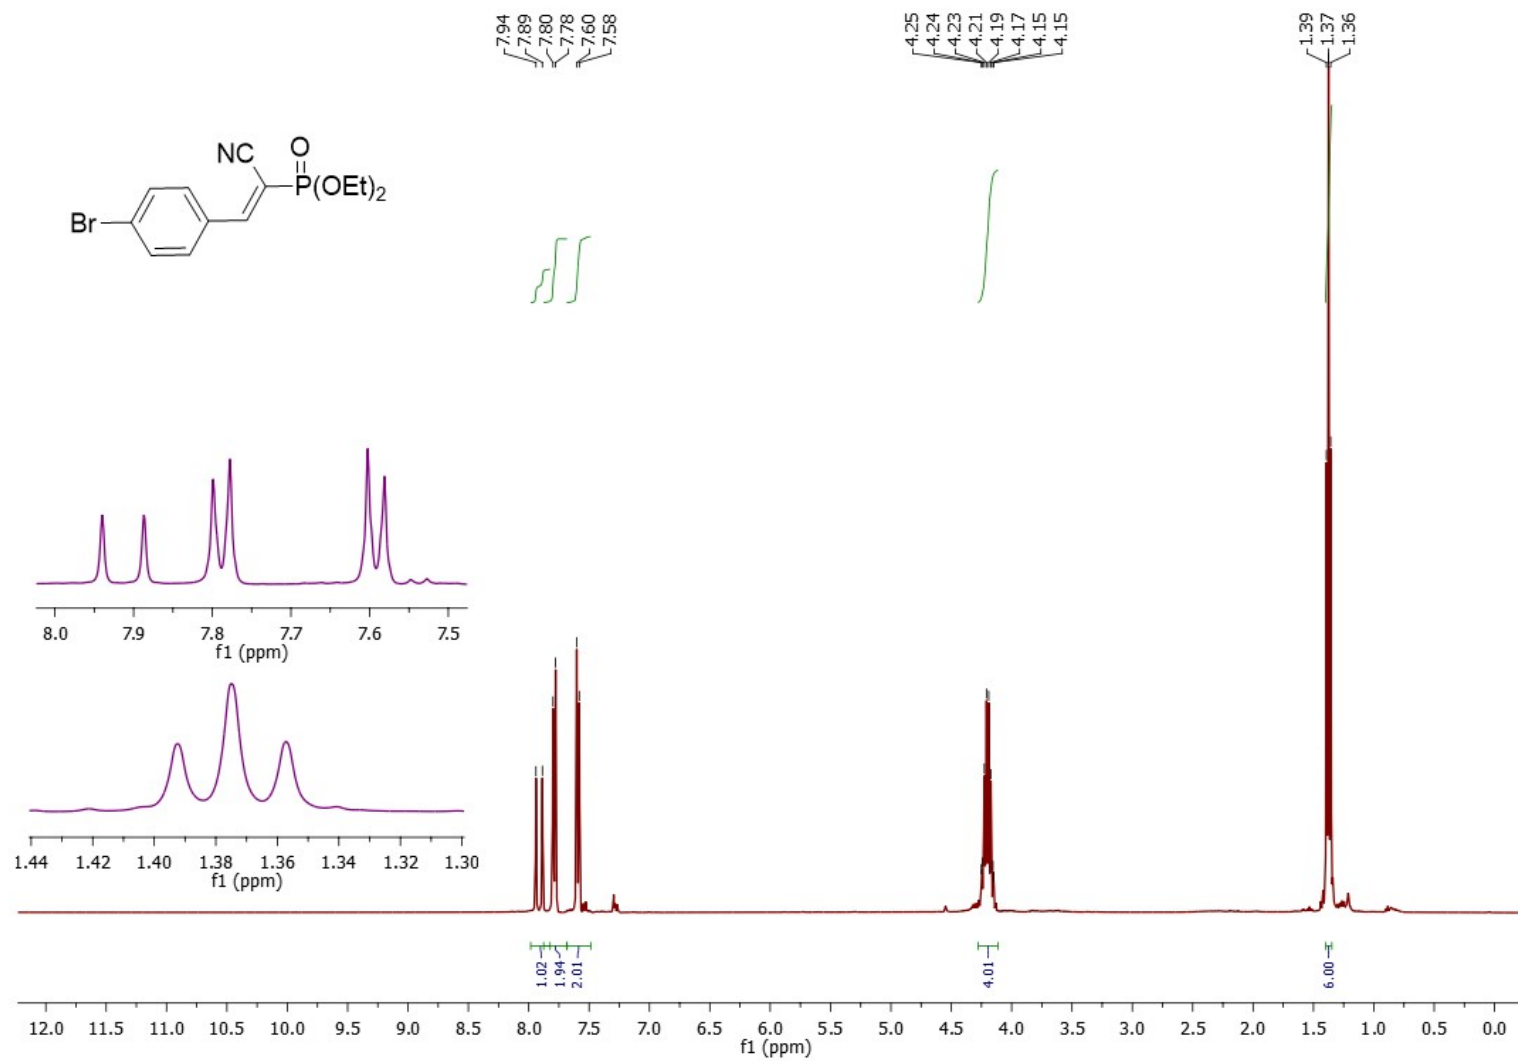

Figure S7:  $^1\text{H}$ NMR Spectra of 2c

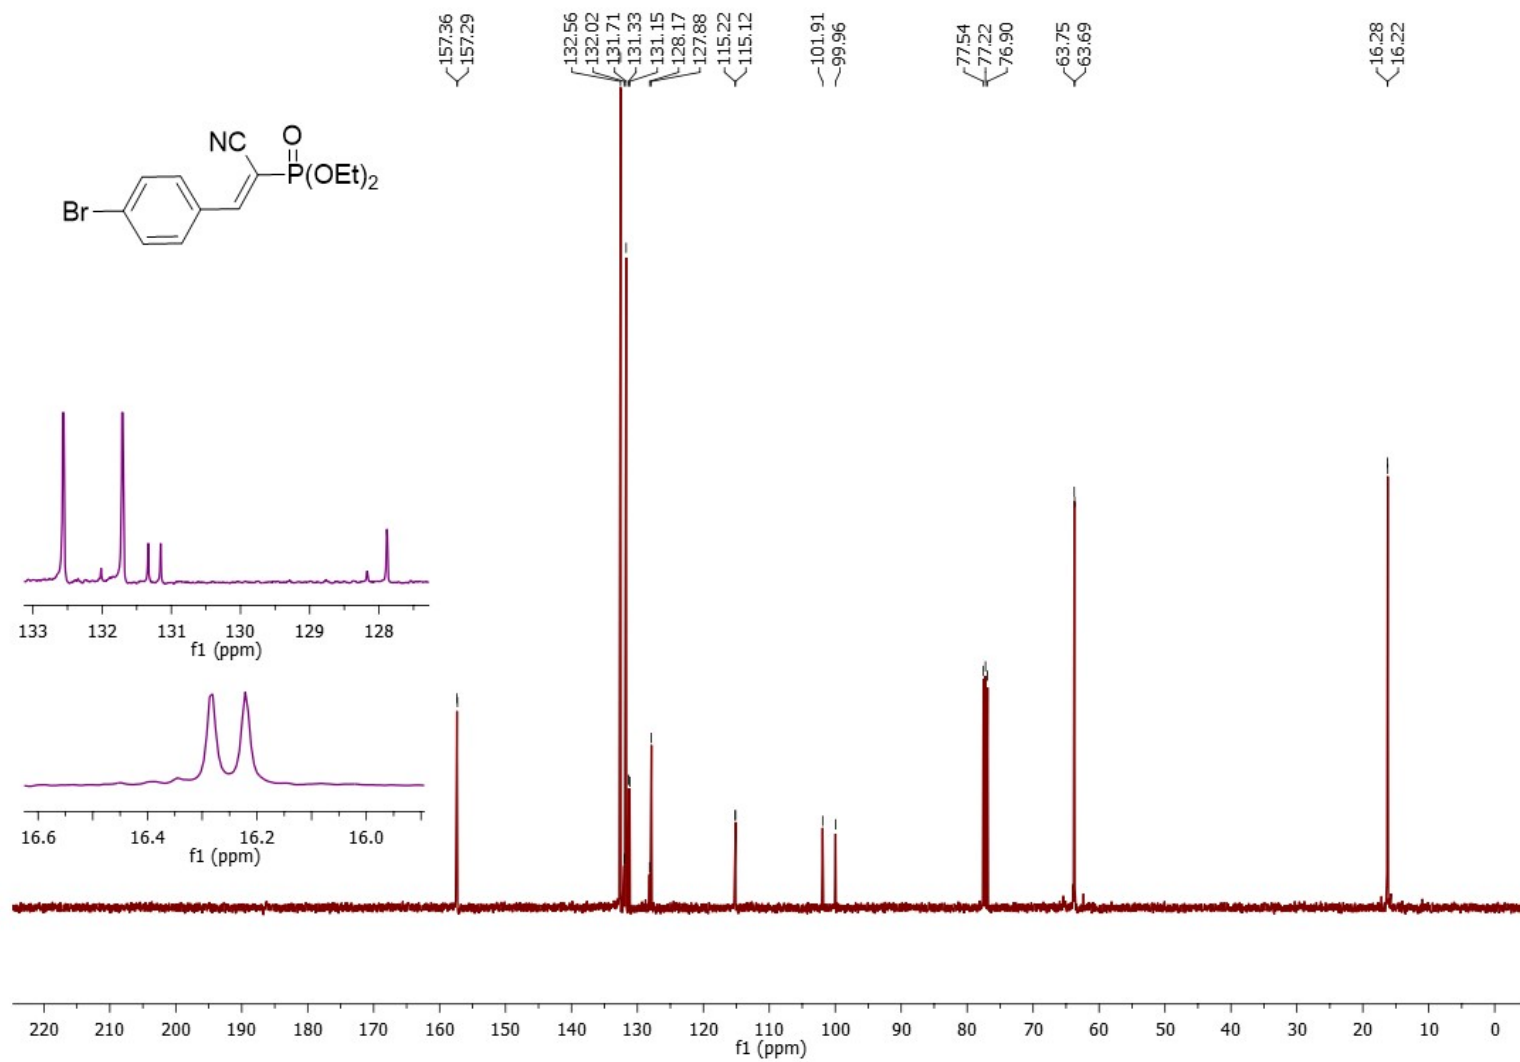

Figure S8: <sup>13</sup>C NMR Spectra of 2c

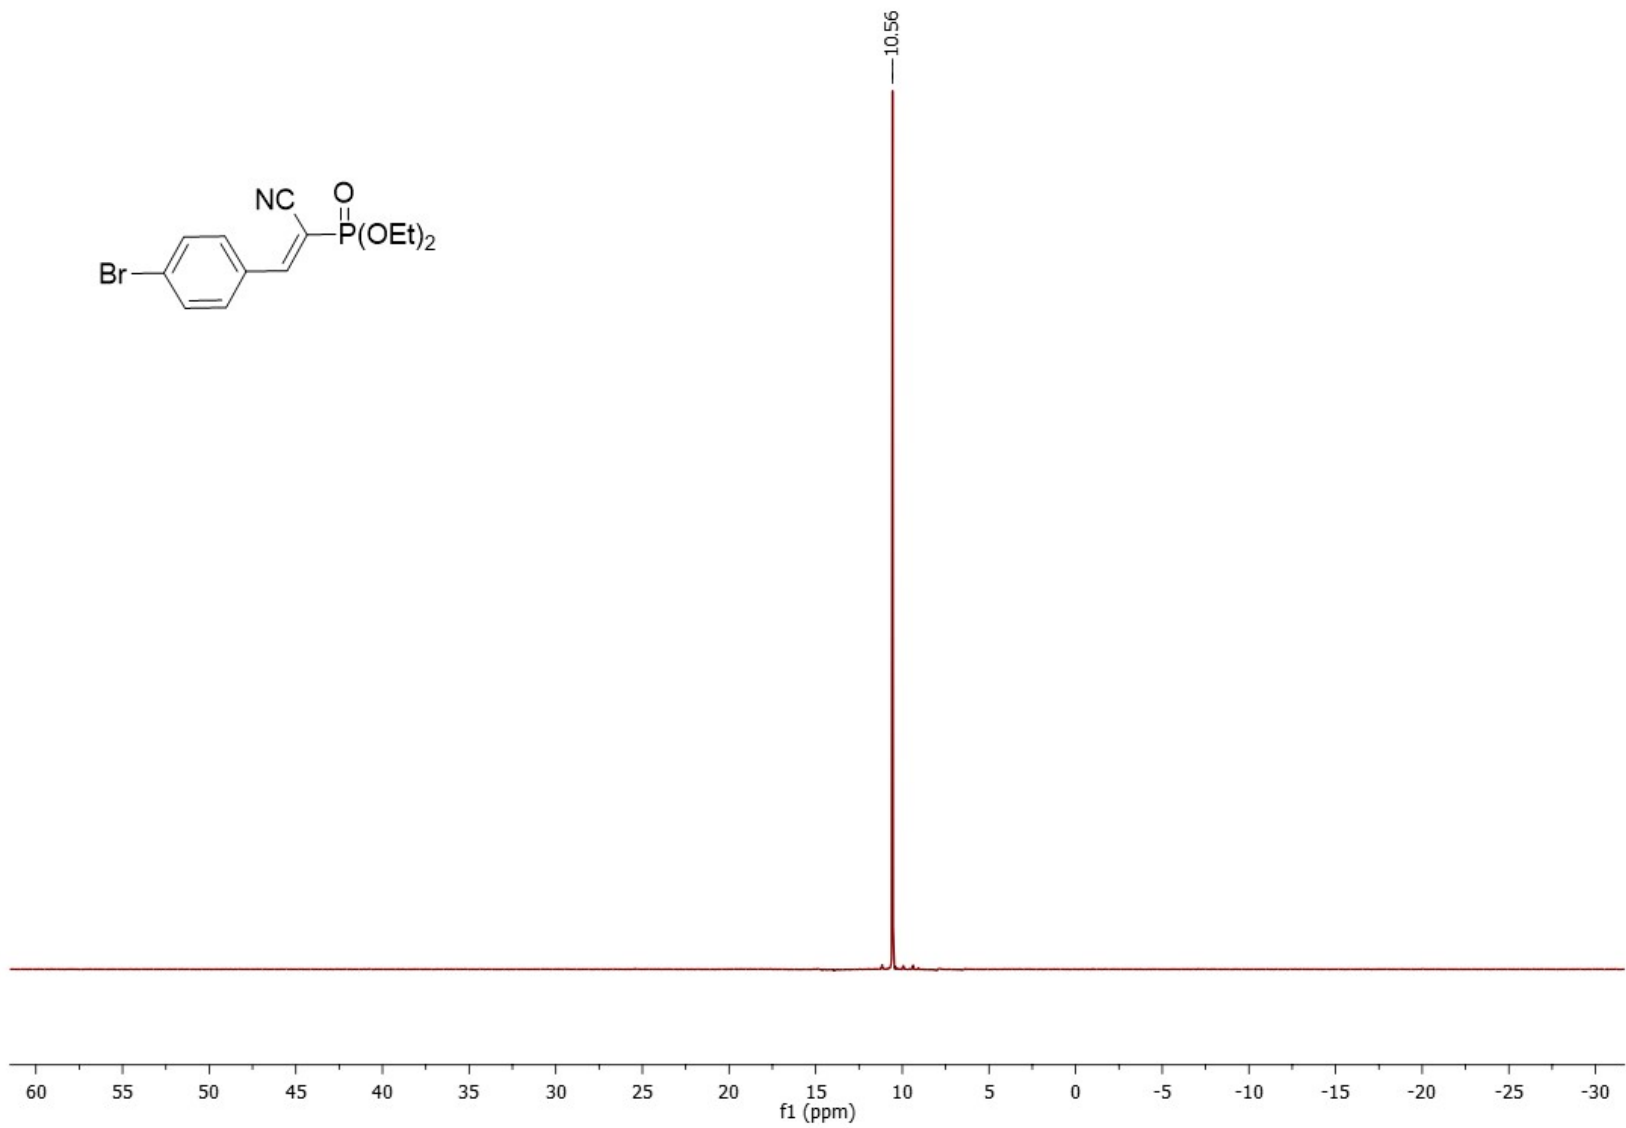

Figure S9:  $^{31}\text{P}$  NMR Spectra of 2c

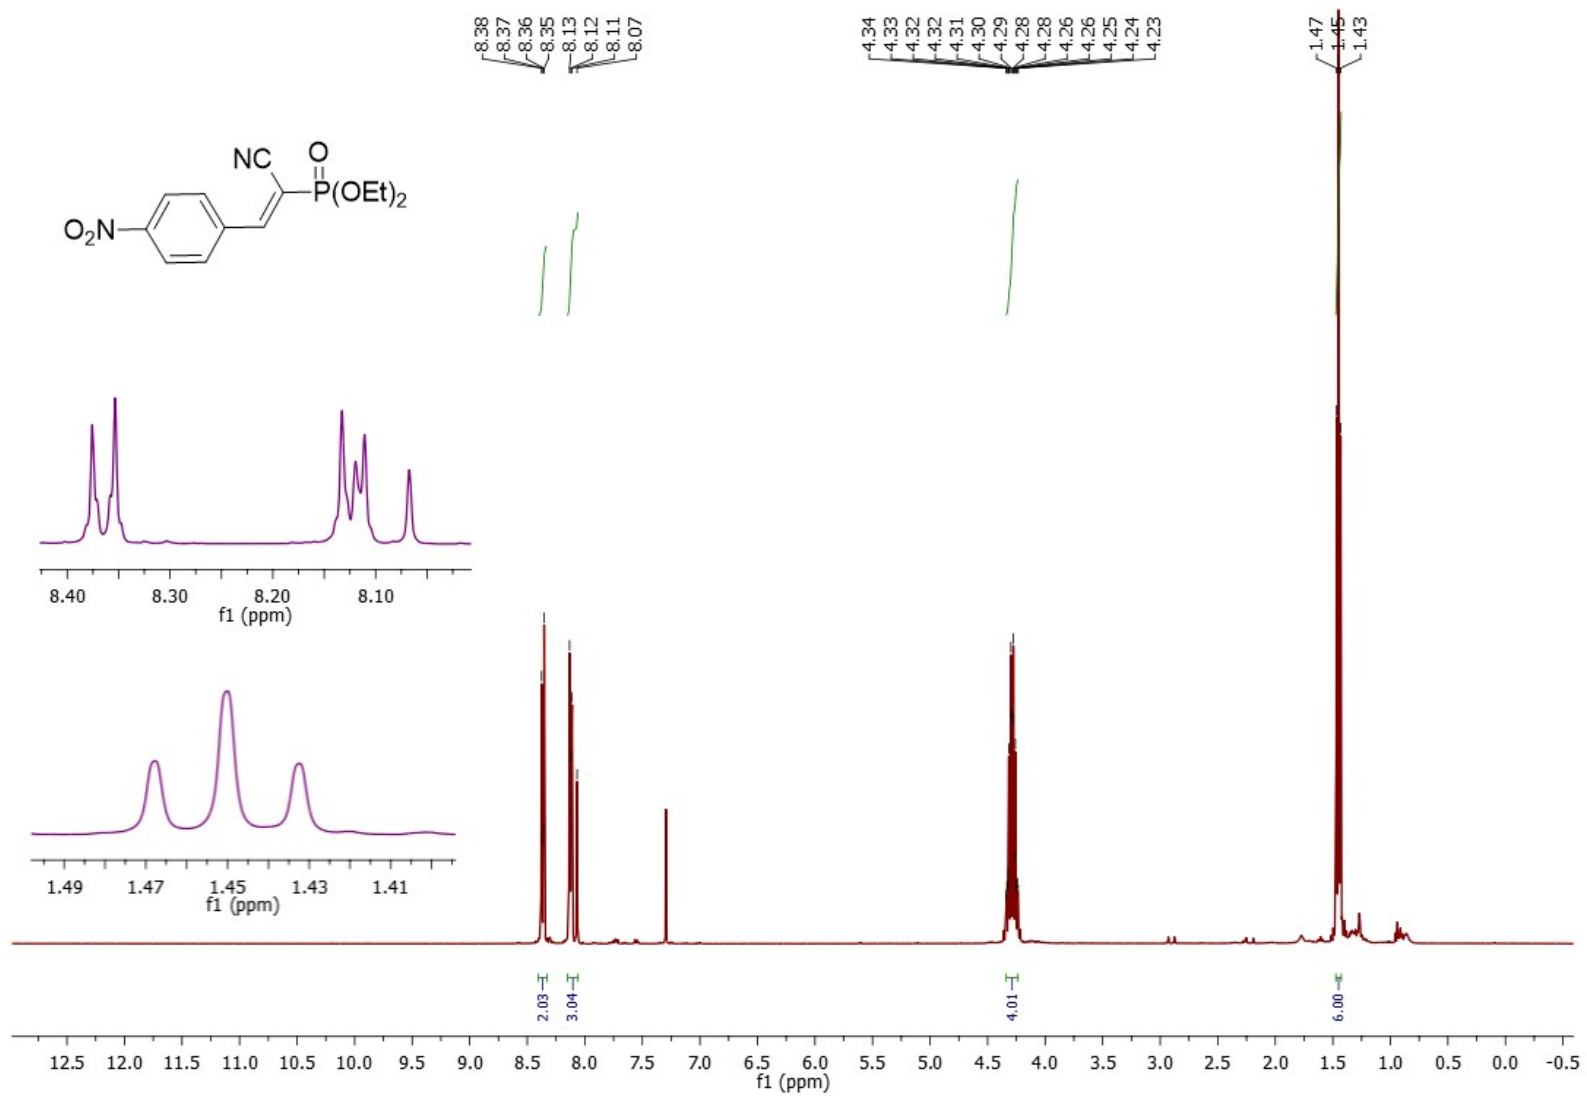

Figure S10: <sup>1</sup>H NMR Spectra of 2d

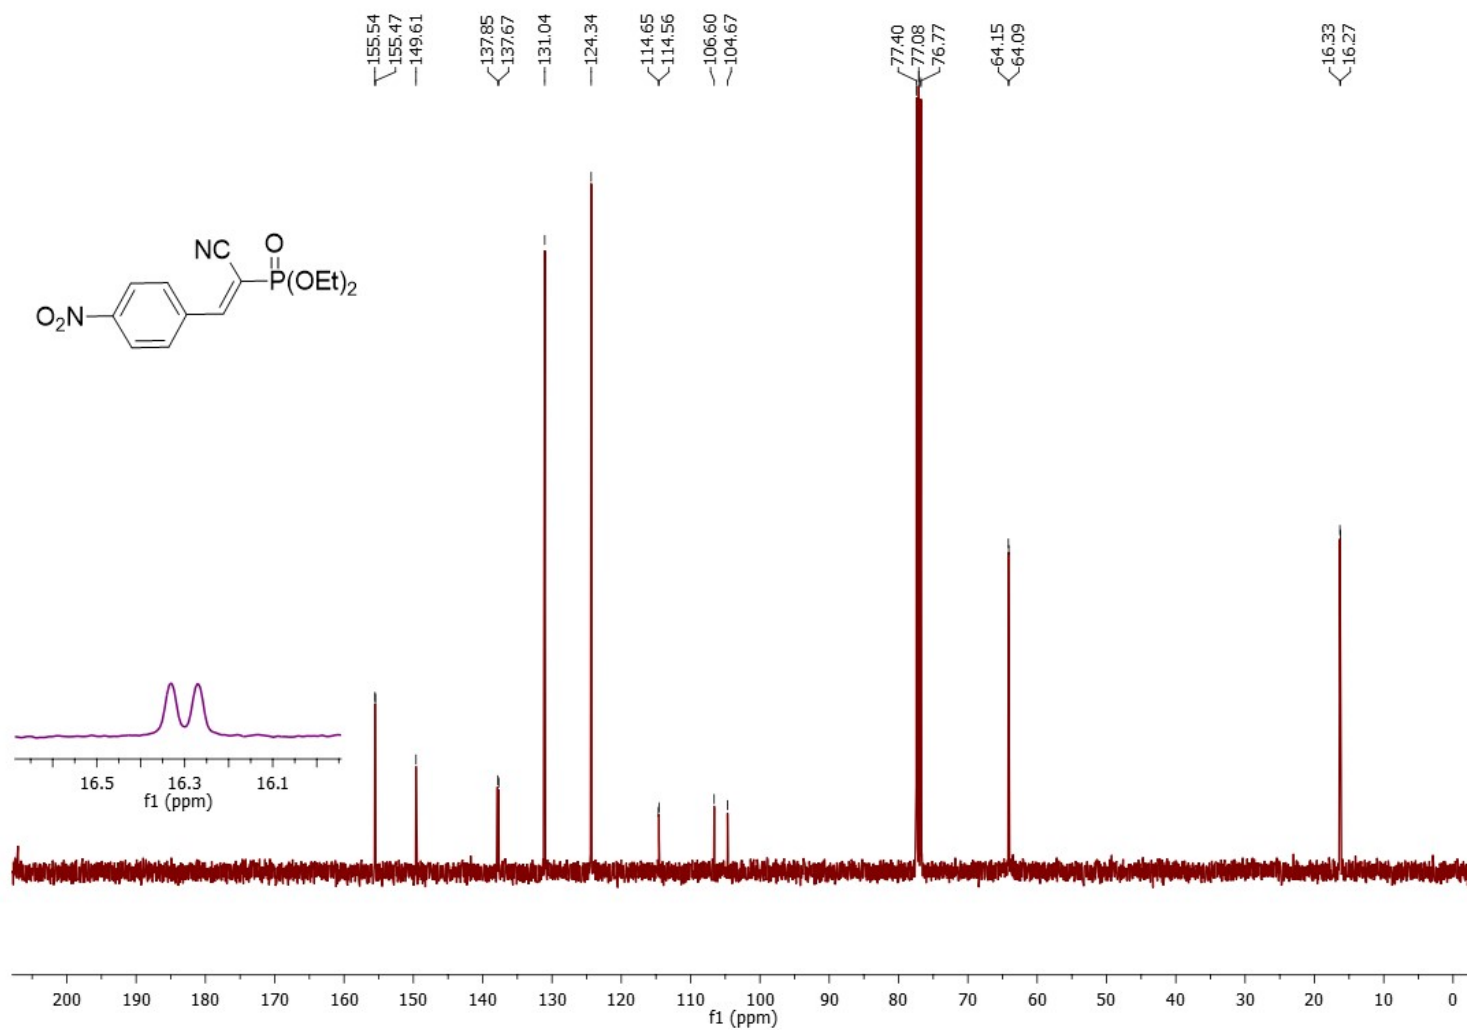

Figure S11: <sup>13</sup>C NMR Spectra of 2d

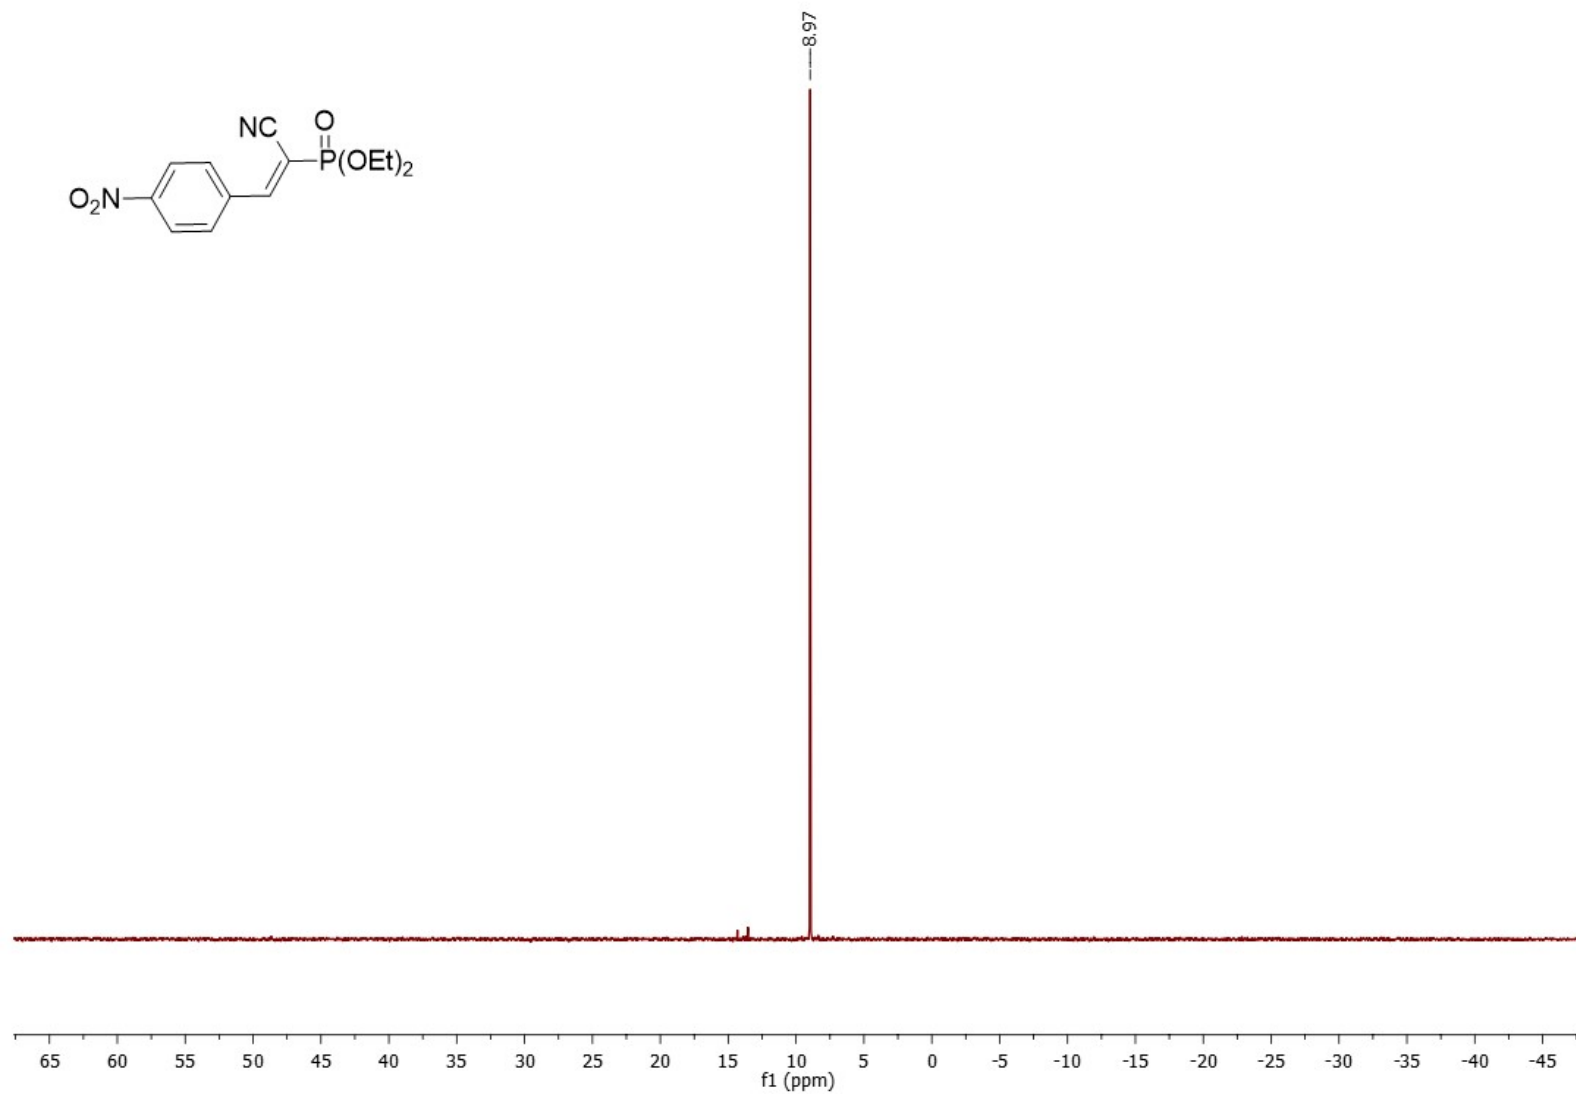

Figure S12:  $^{31}\text{P}$  NMR Spectra of 2d



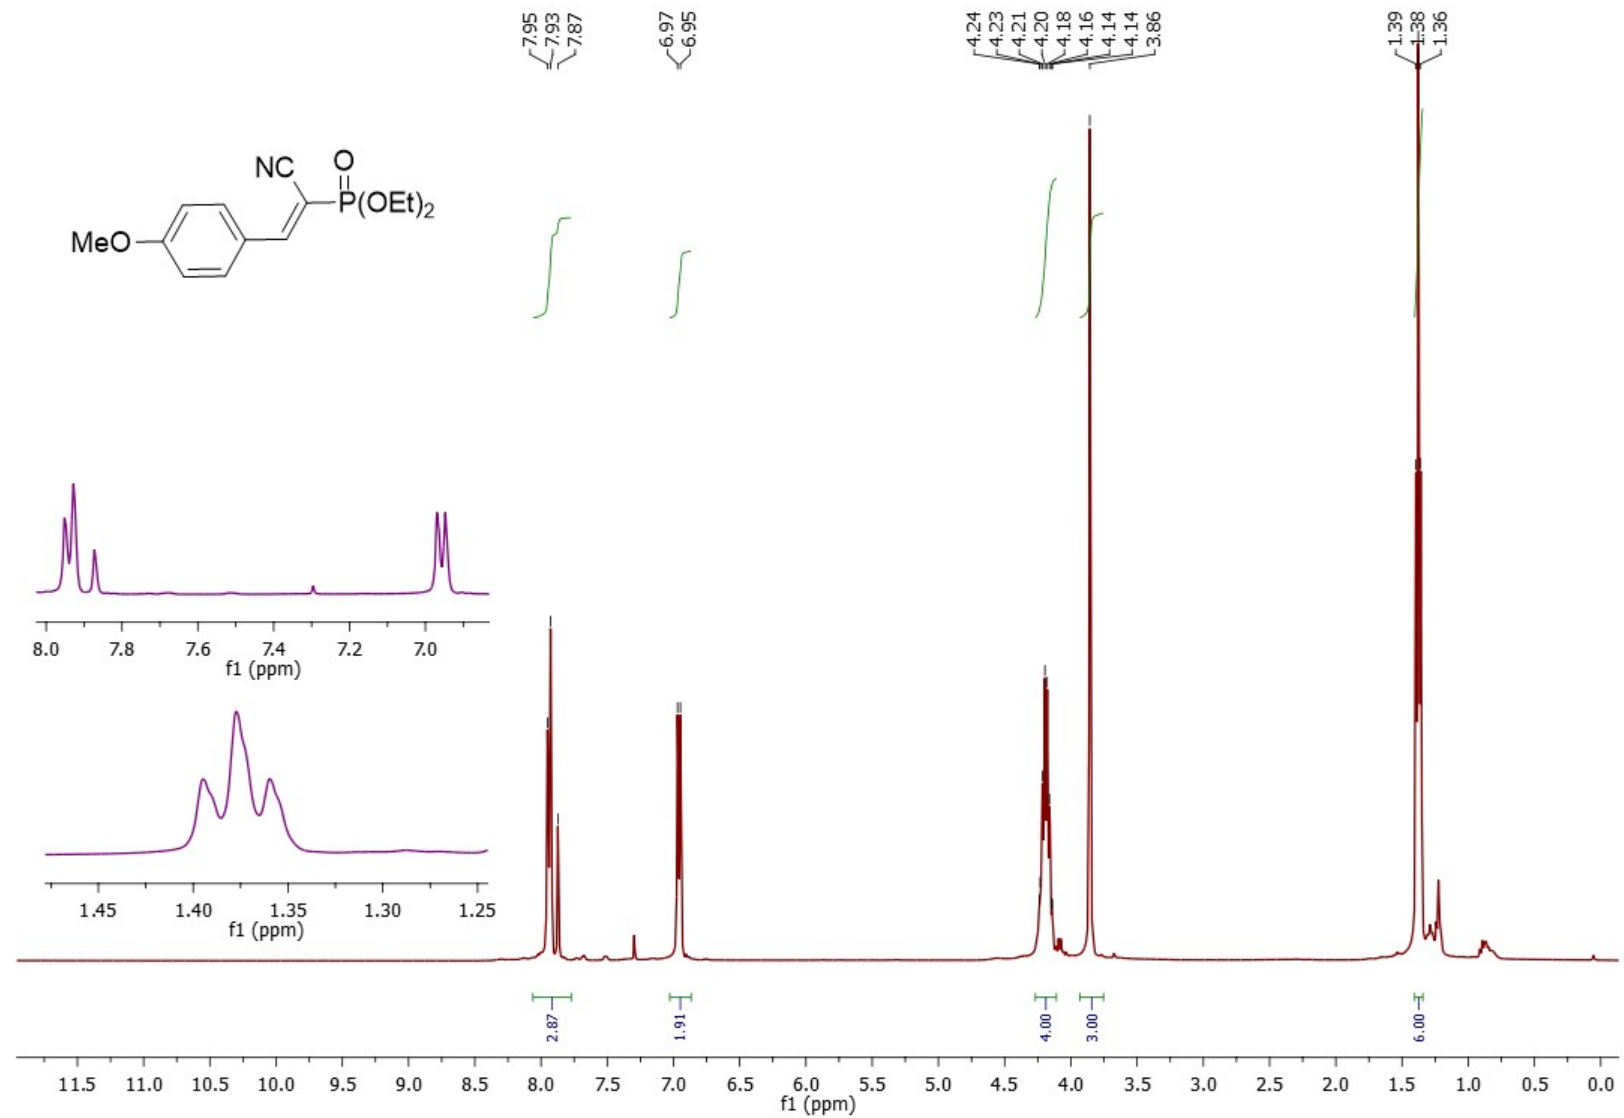

Figure S13: <sup>1</sup>H NMR Spectra of 2e

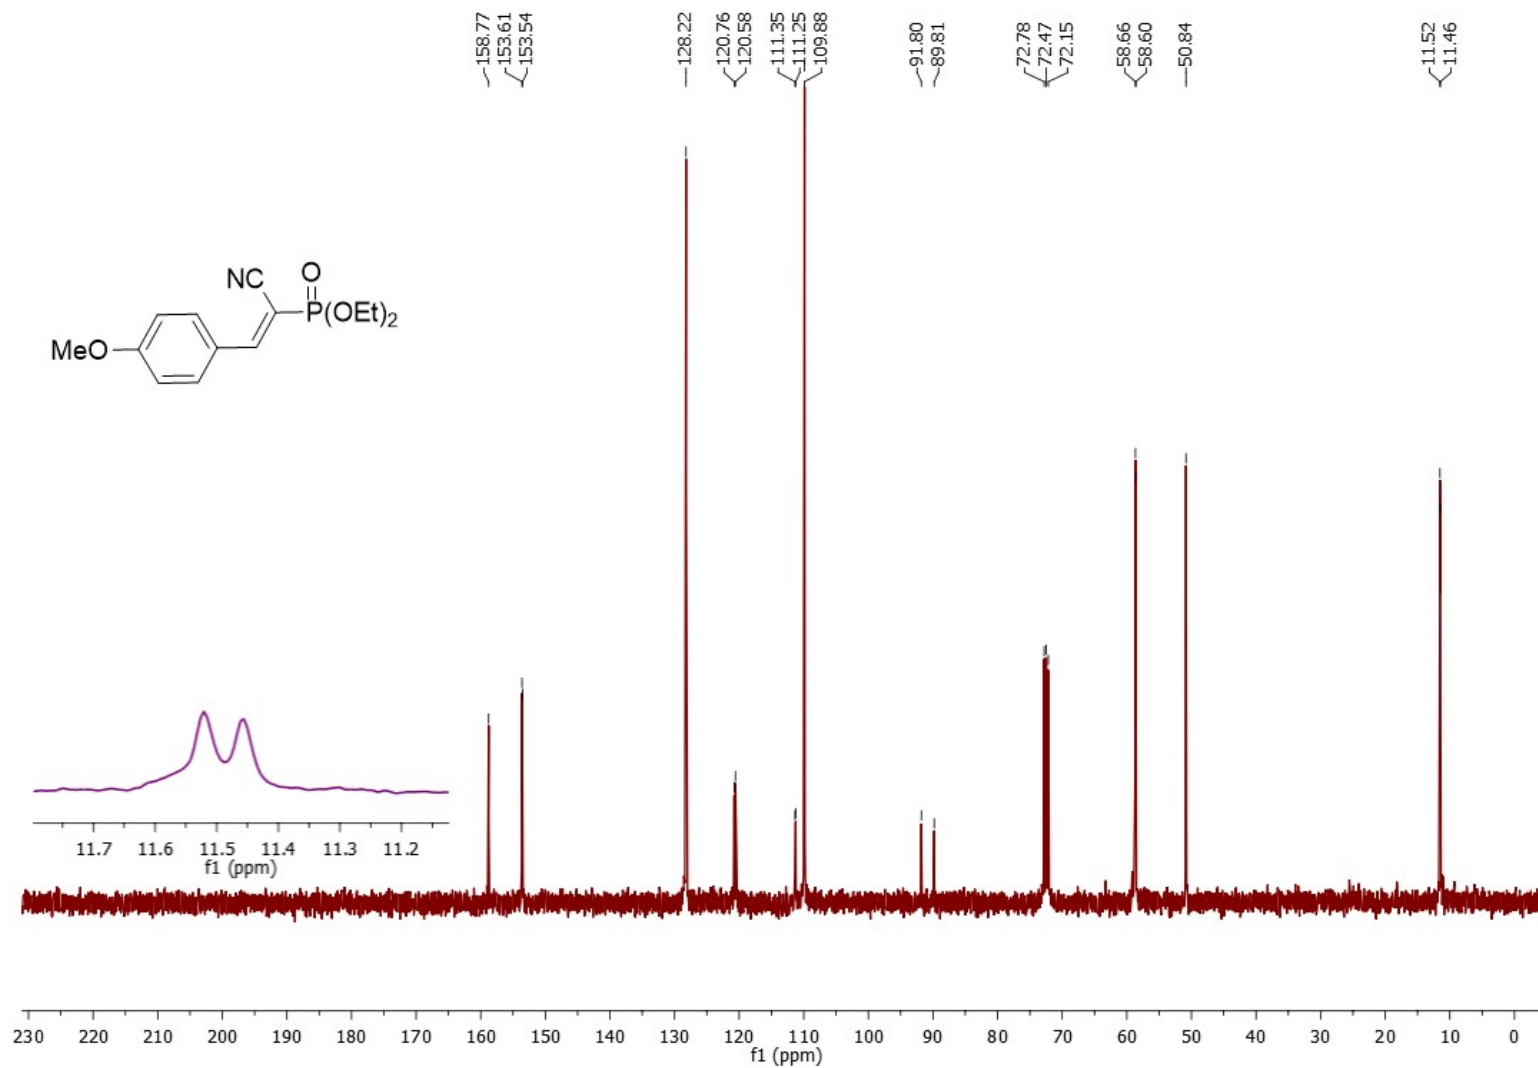

Figure S14: <sup>13</sup>C NMR Spectra of 2e

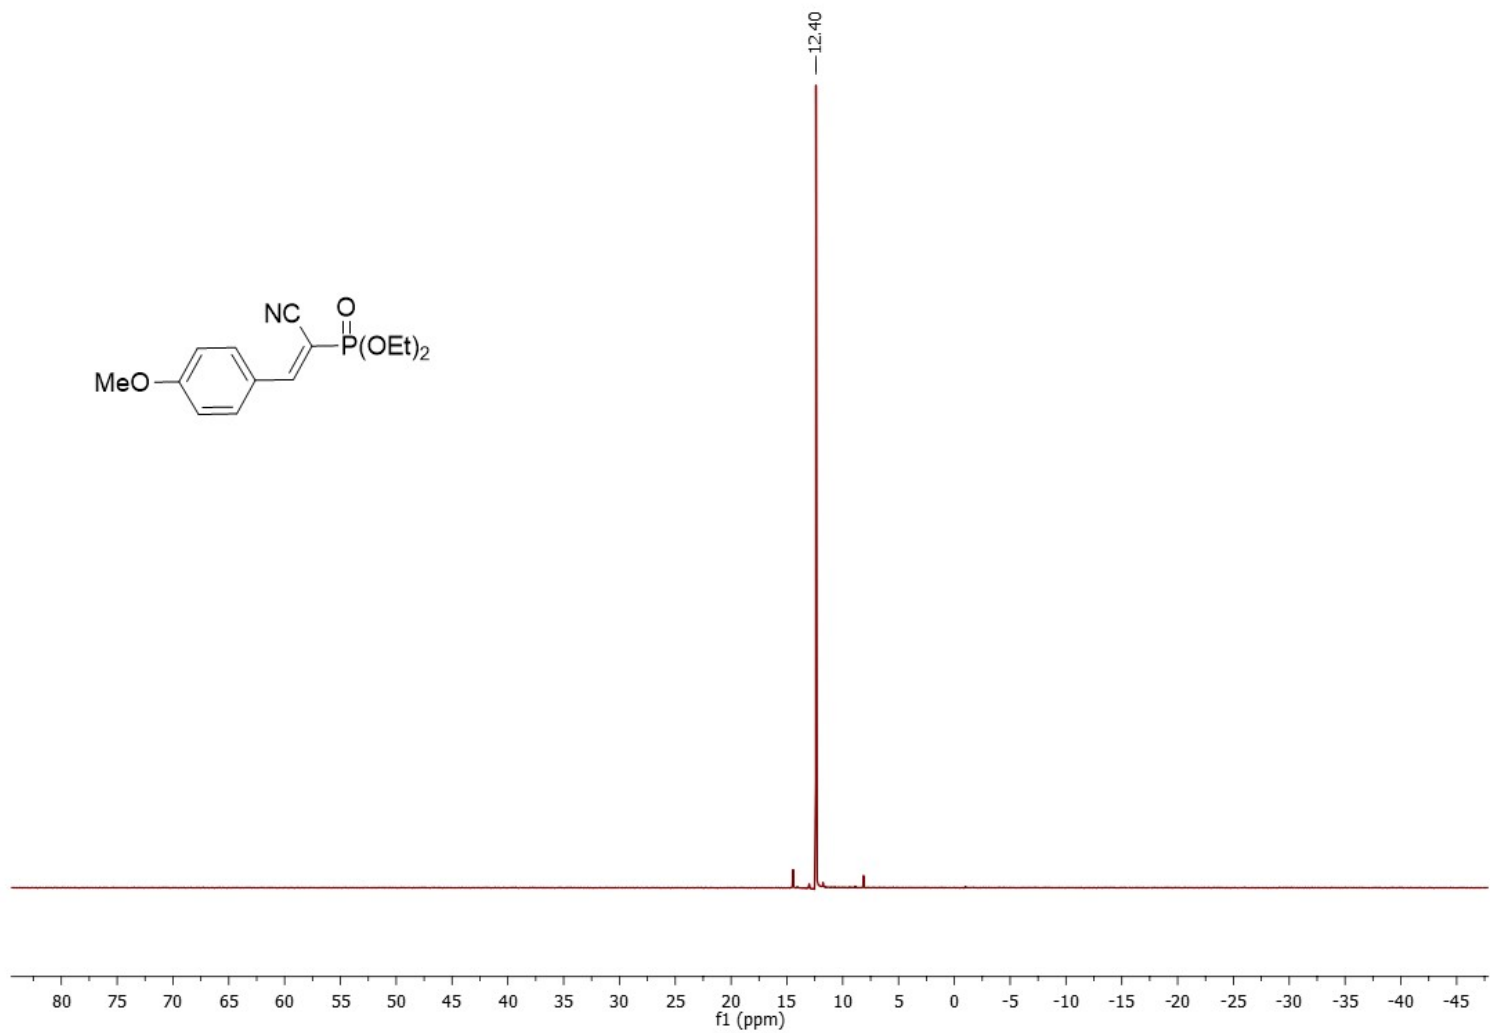

Figure S15: <sup>31</sup>P NMR Spectra of 2e

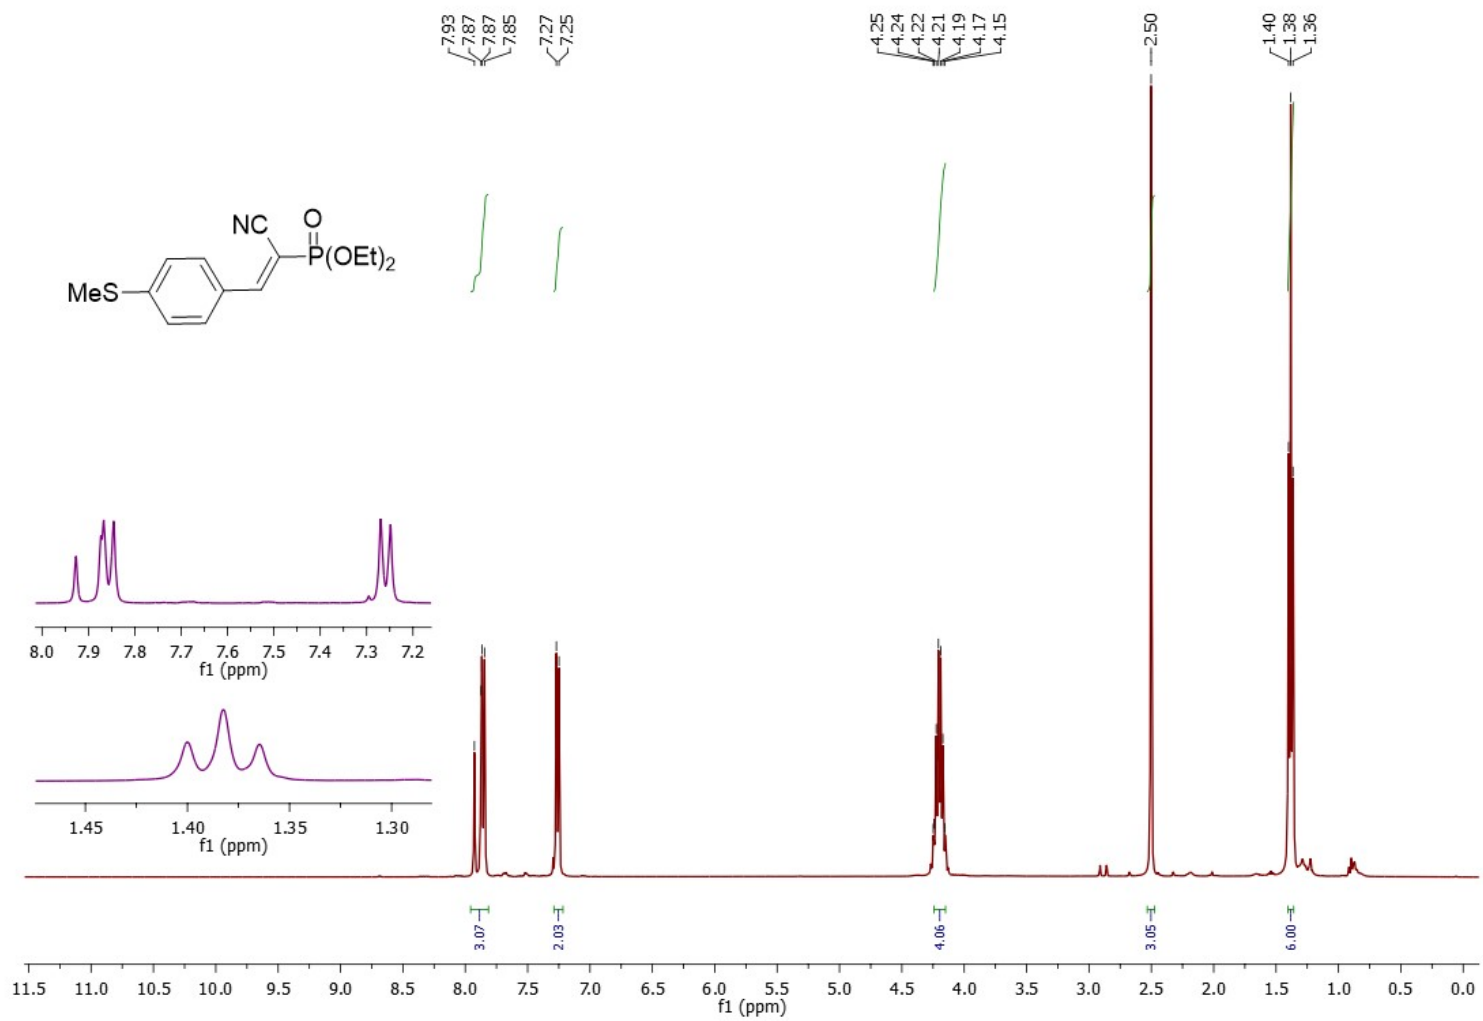

Figure S16: <sup>1</sup>H NMR Spectra of 2f

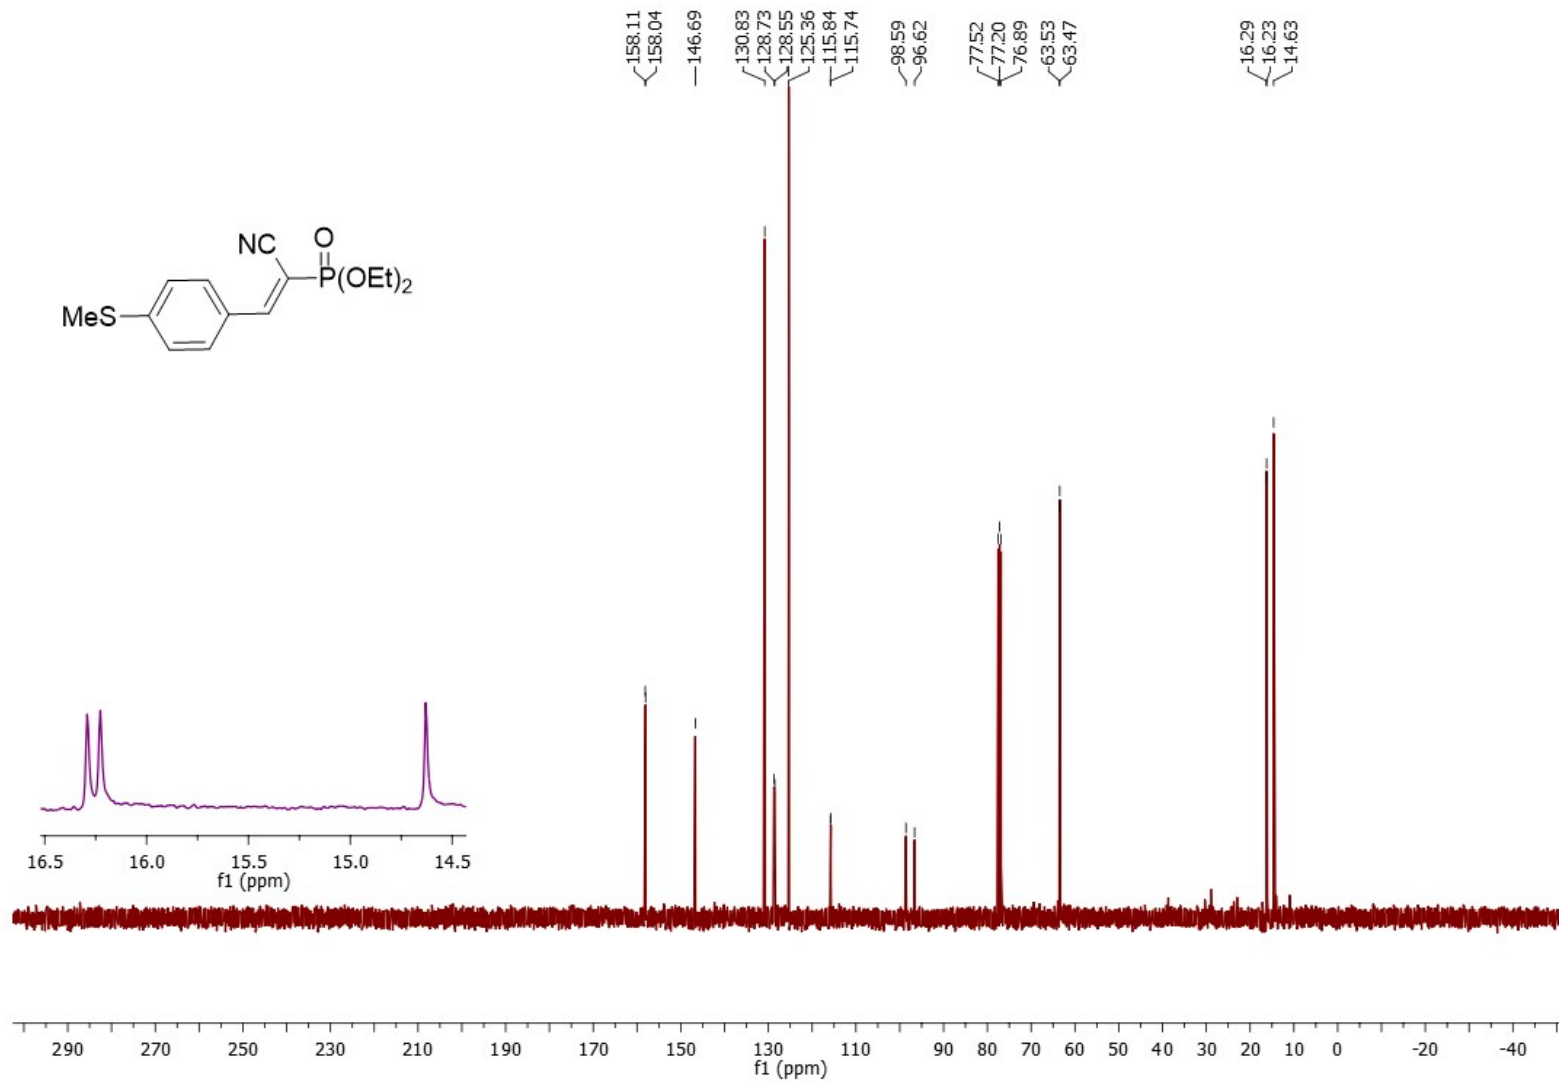

Figure S17: <sup>13</sup>C NMR Spectra of 2f

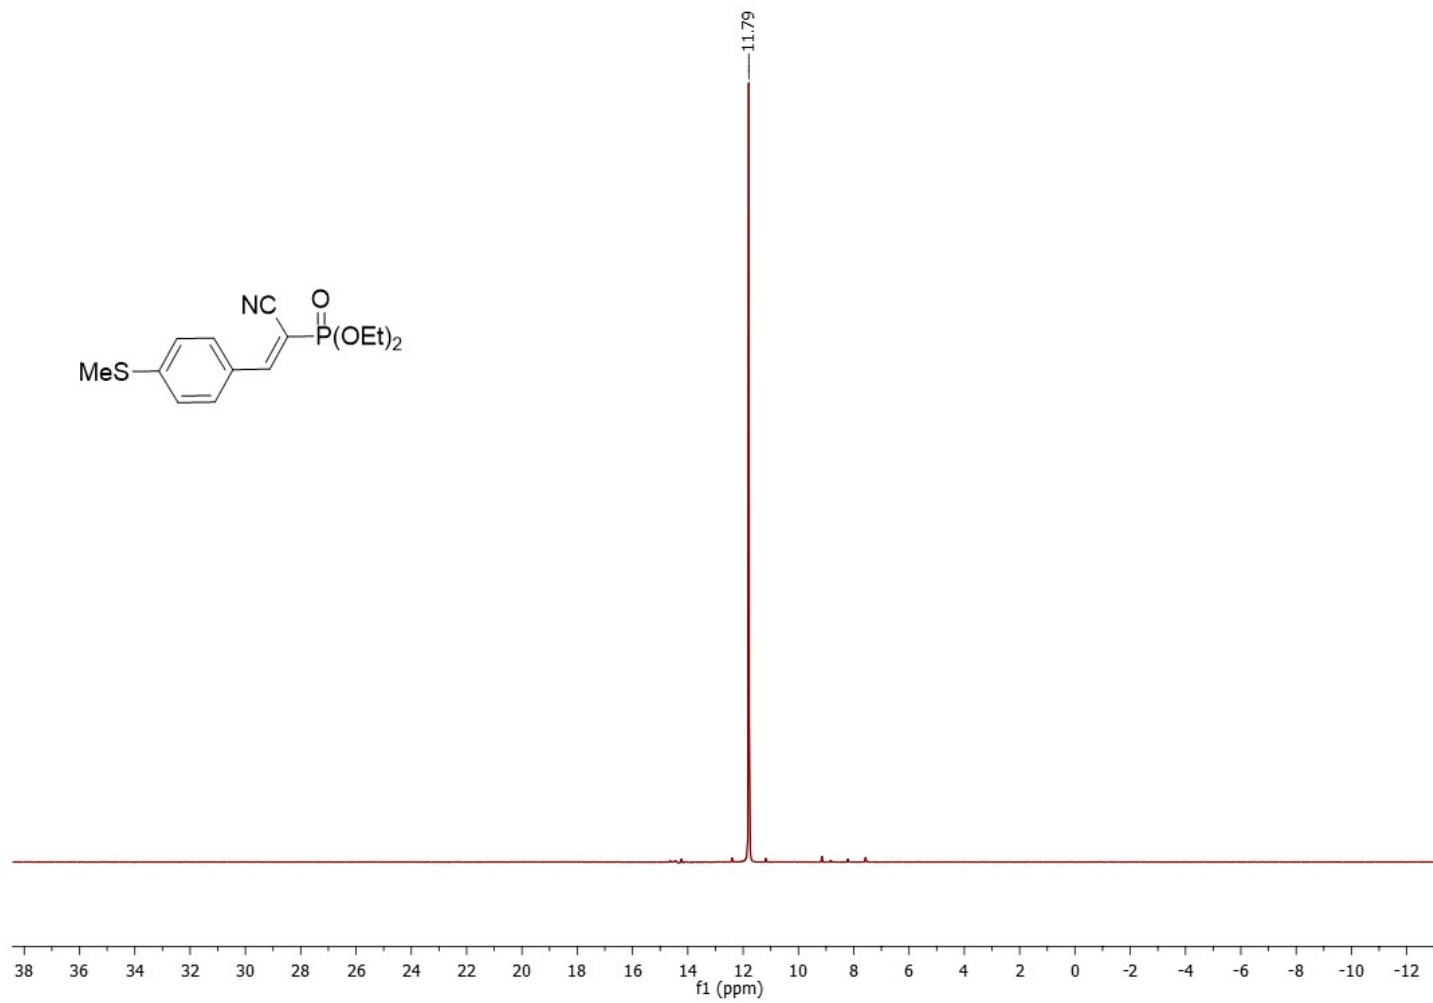

Figure S18:  $^{31}\text{P}$  NMR Spectra of 2f

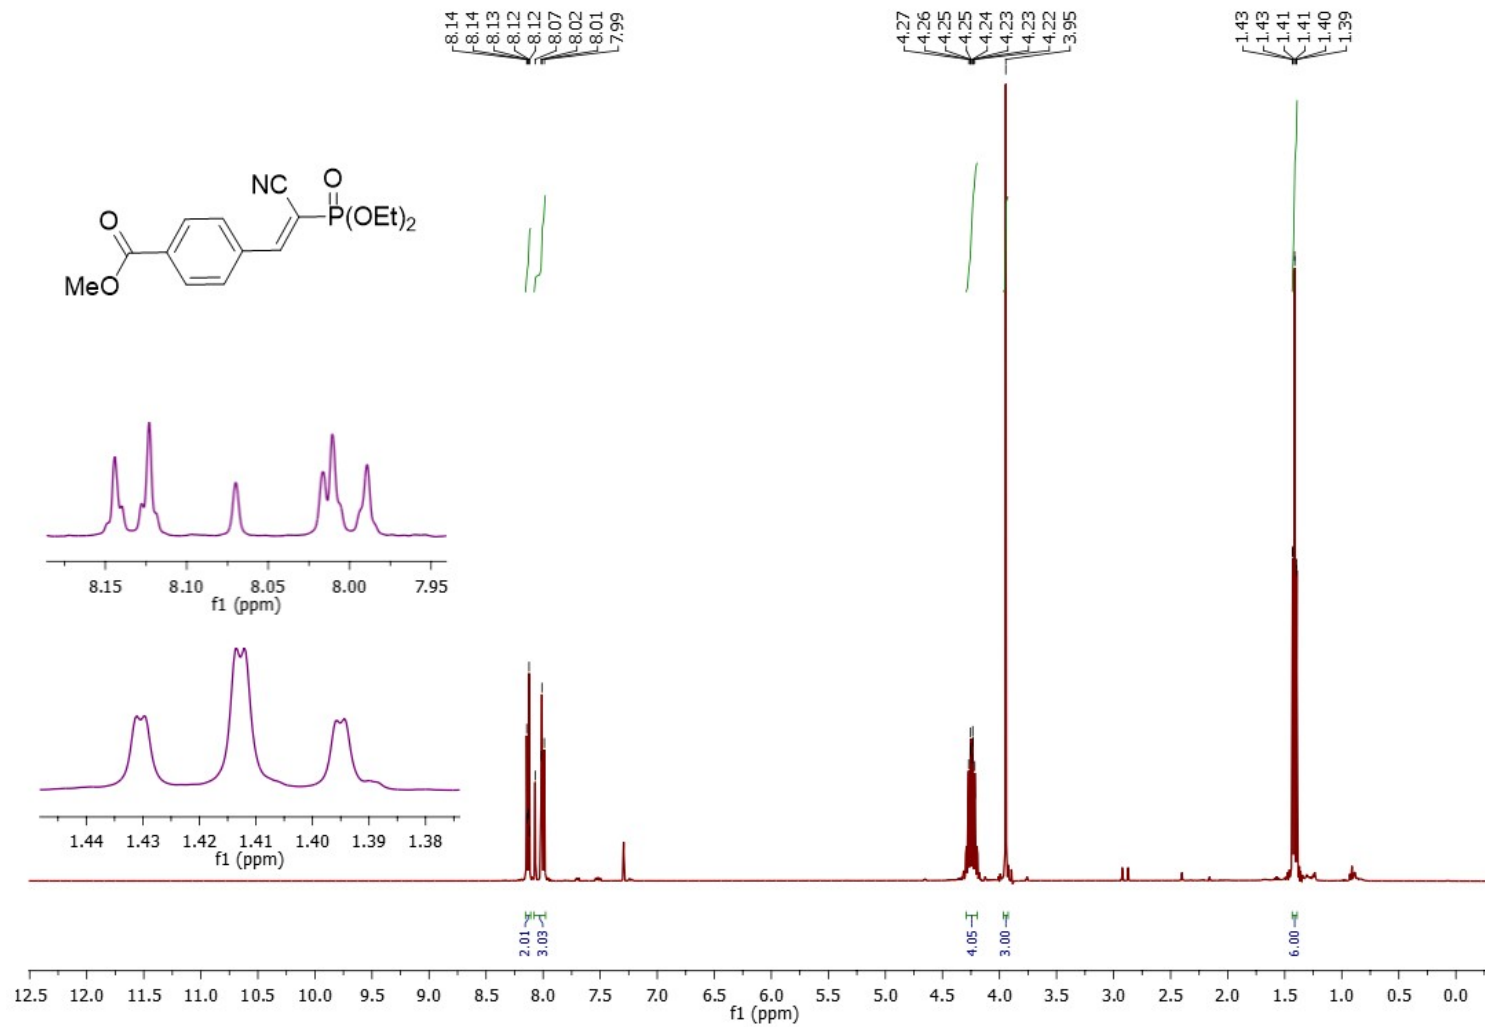

Figure S19: <sup>1</sup>H NMR Spectra of 2g

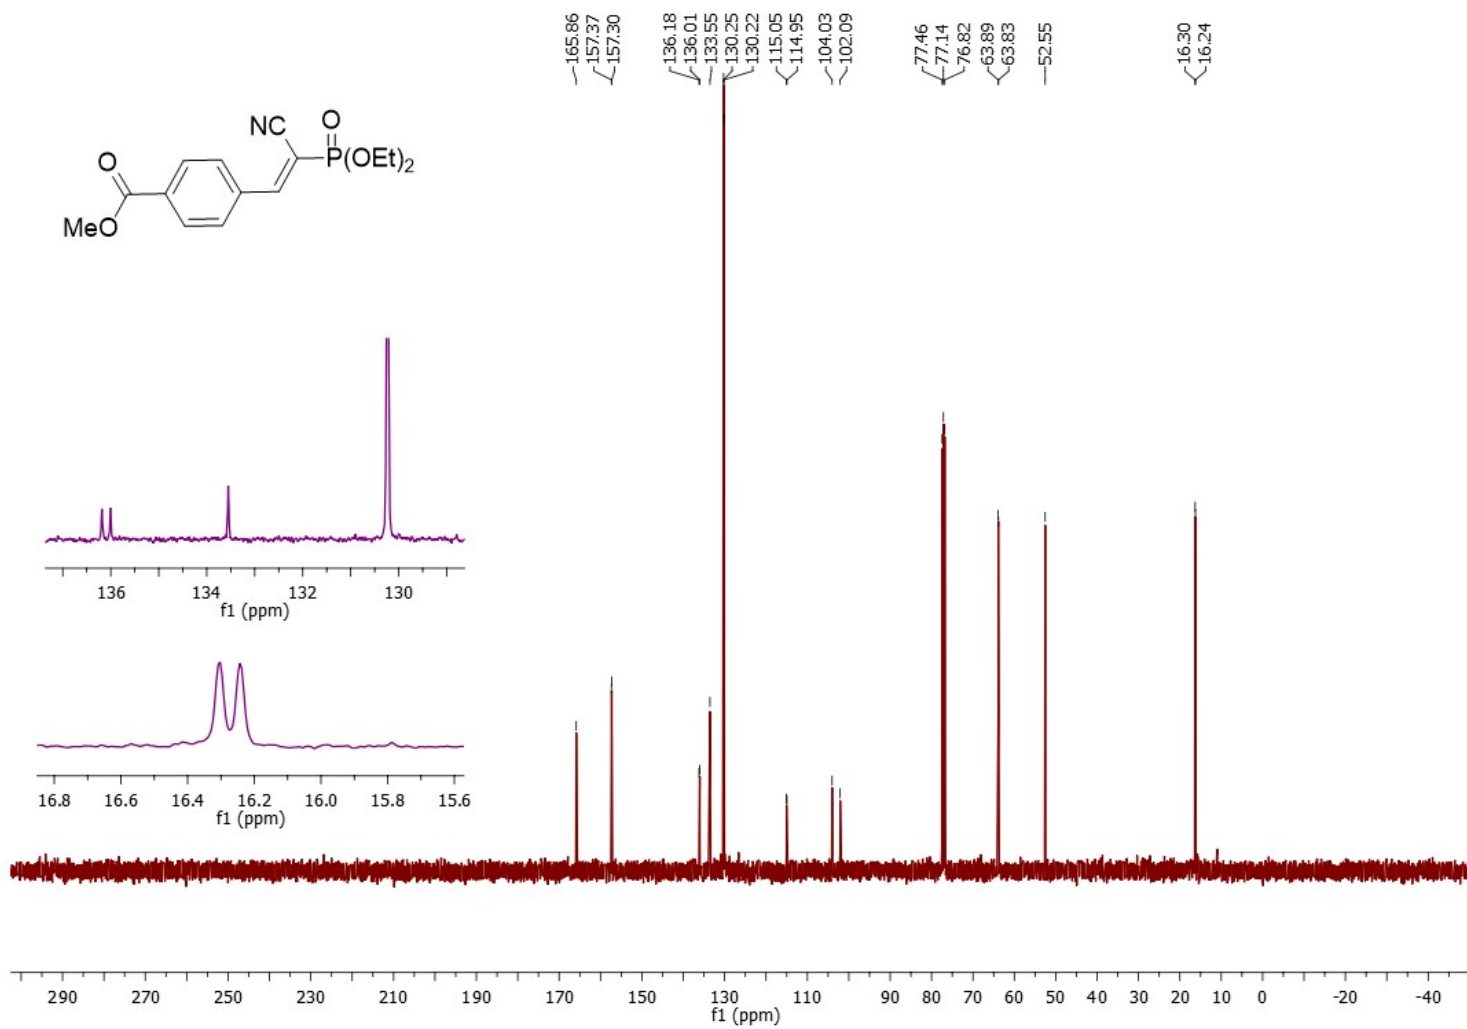

Figure S20: <sup>13</sup>C NMR Spectra of 2g



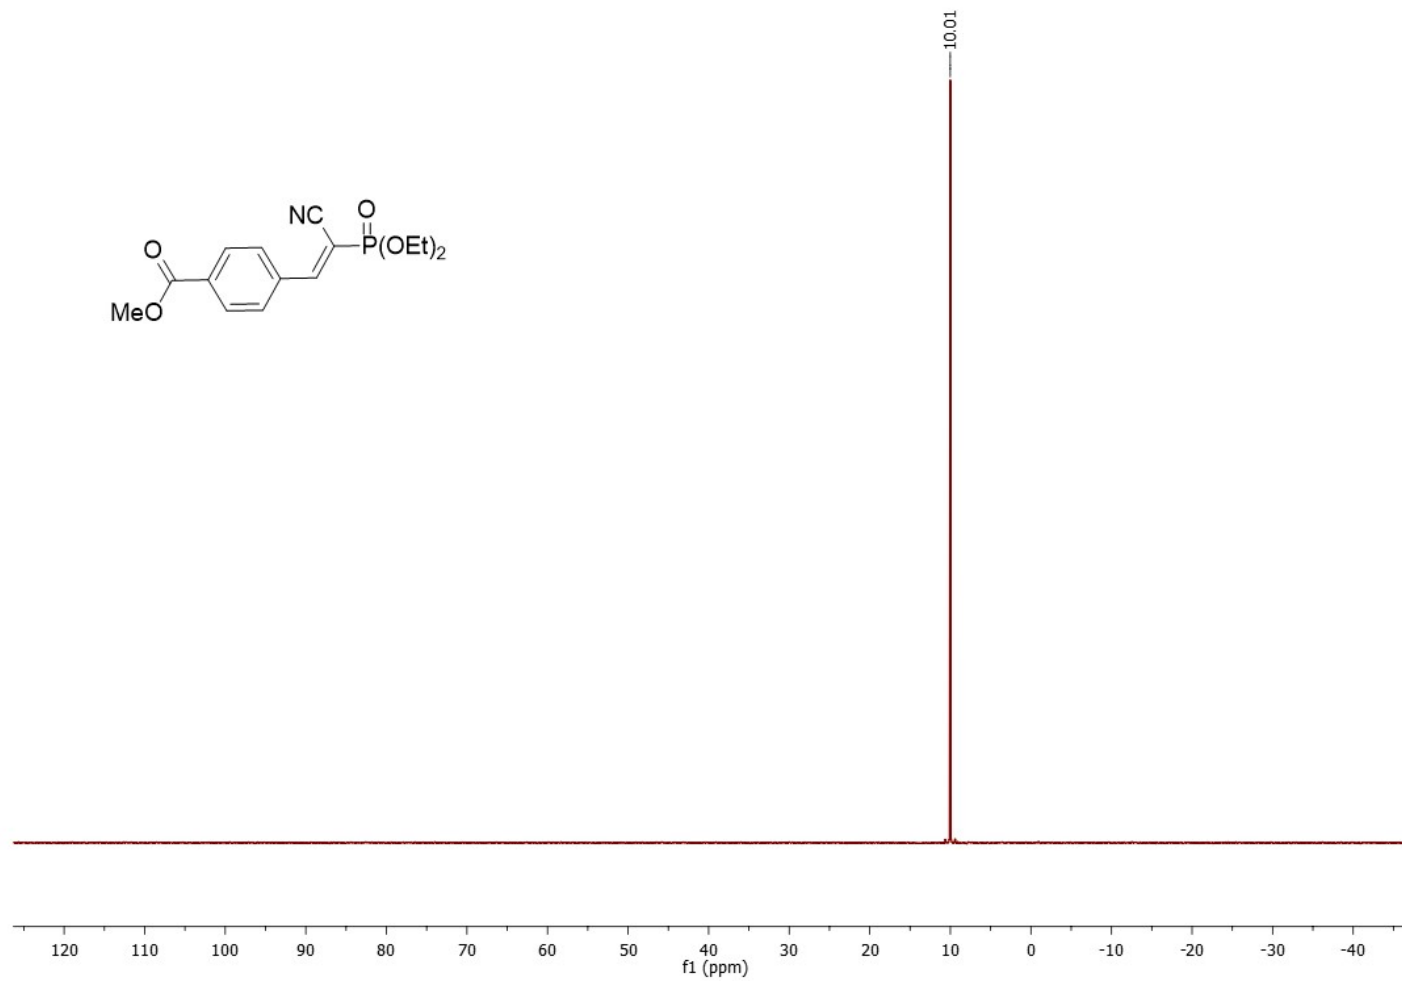

Figure S21:  $^{31}\text{P}$  NMR Spectra of 2g

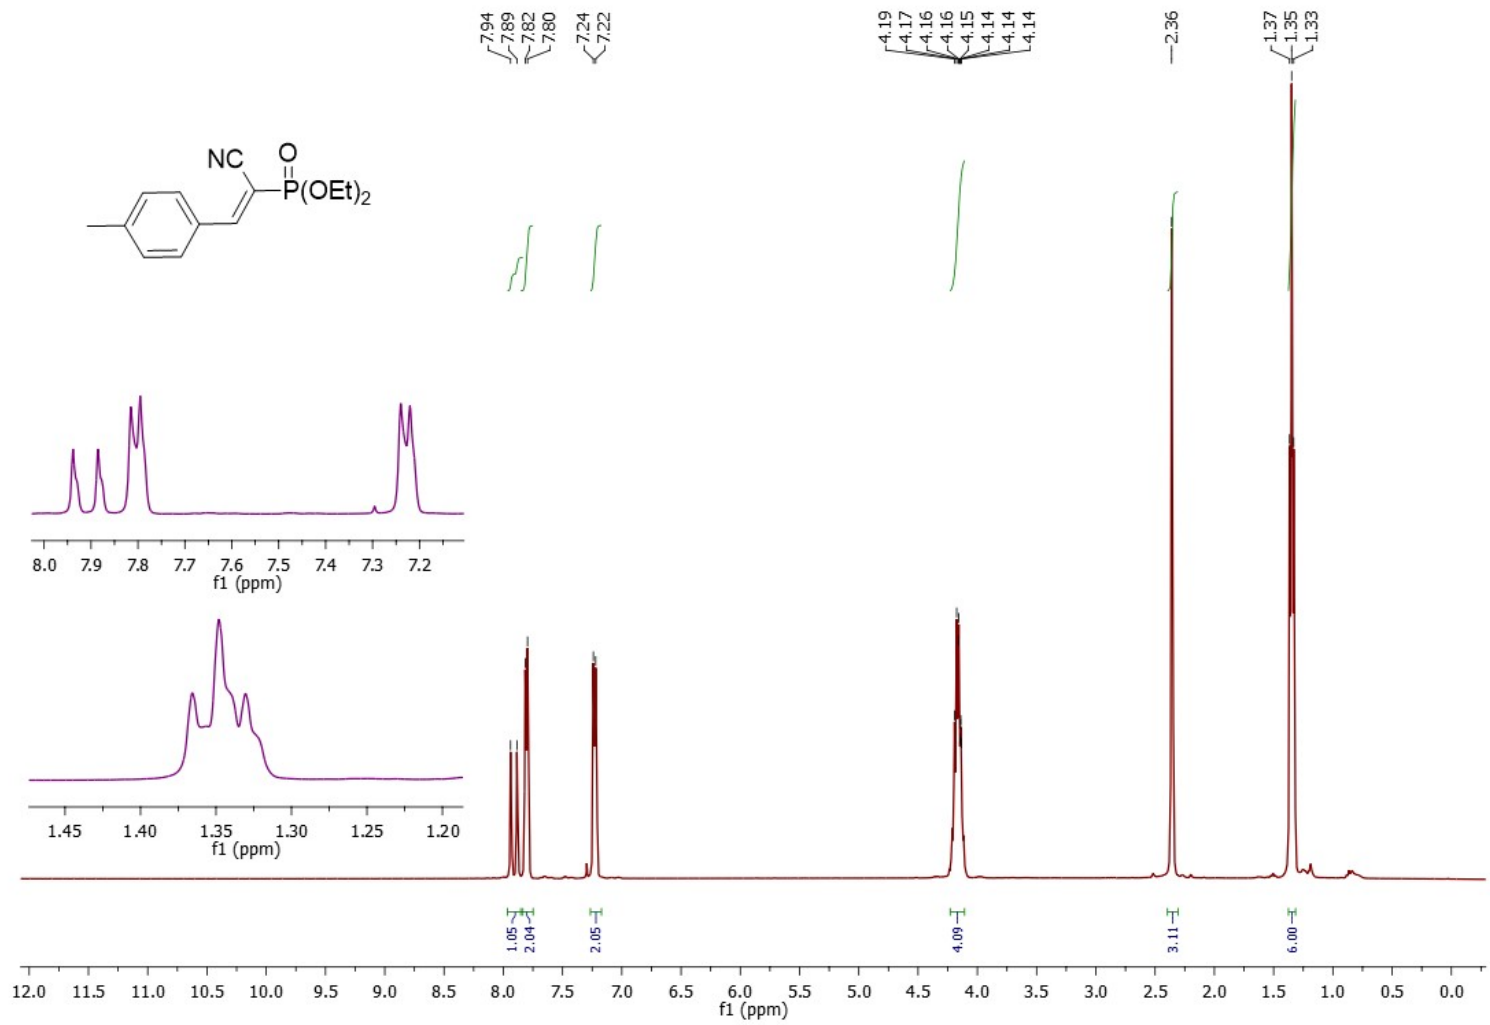

Figure S22: <sup>1</sup>H NMR Spectra of 2h

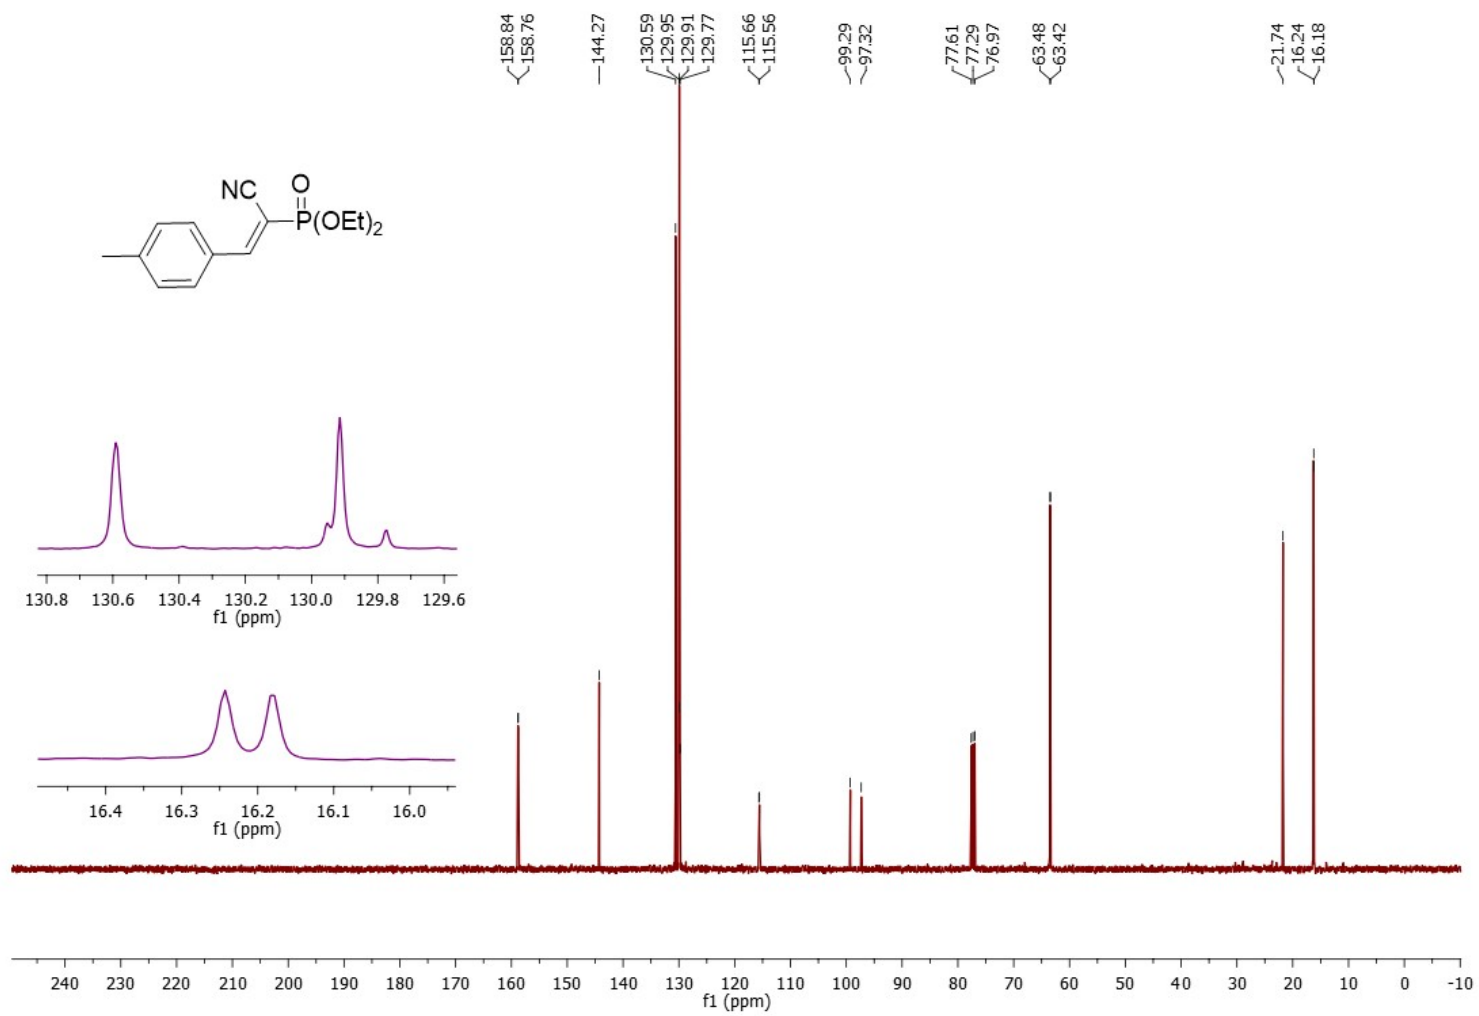

Figure S23: <sup>13</sup>C NMR Spectra of 2h

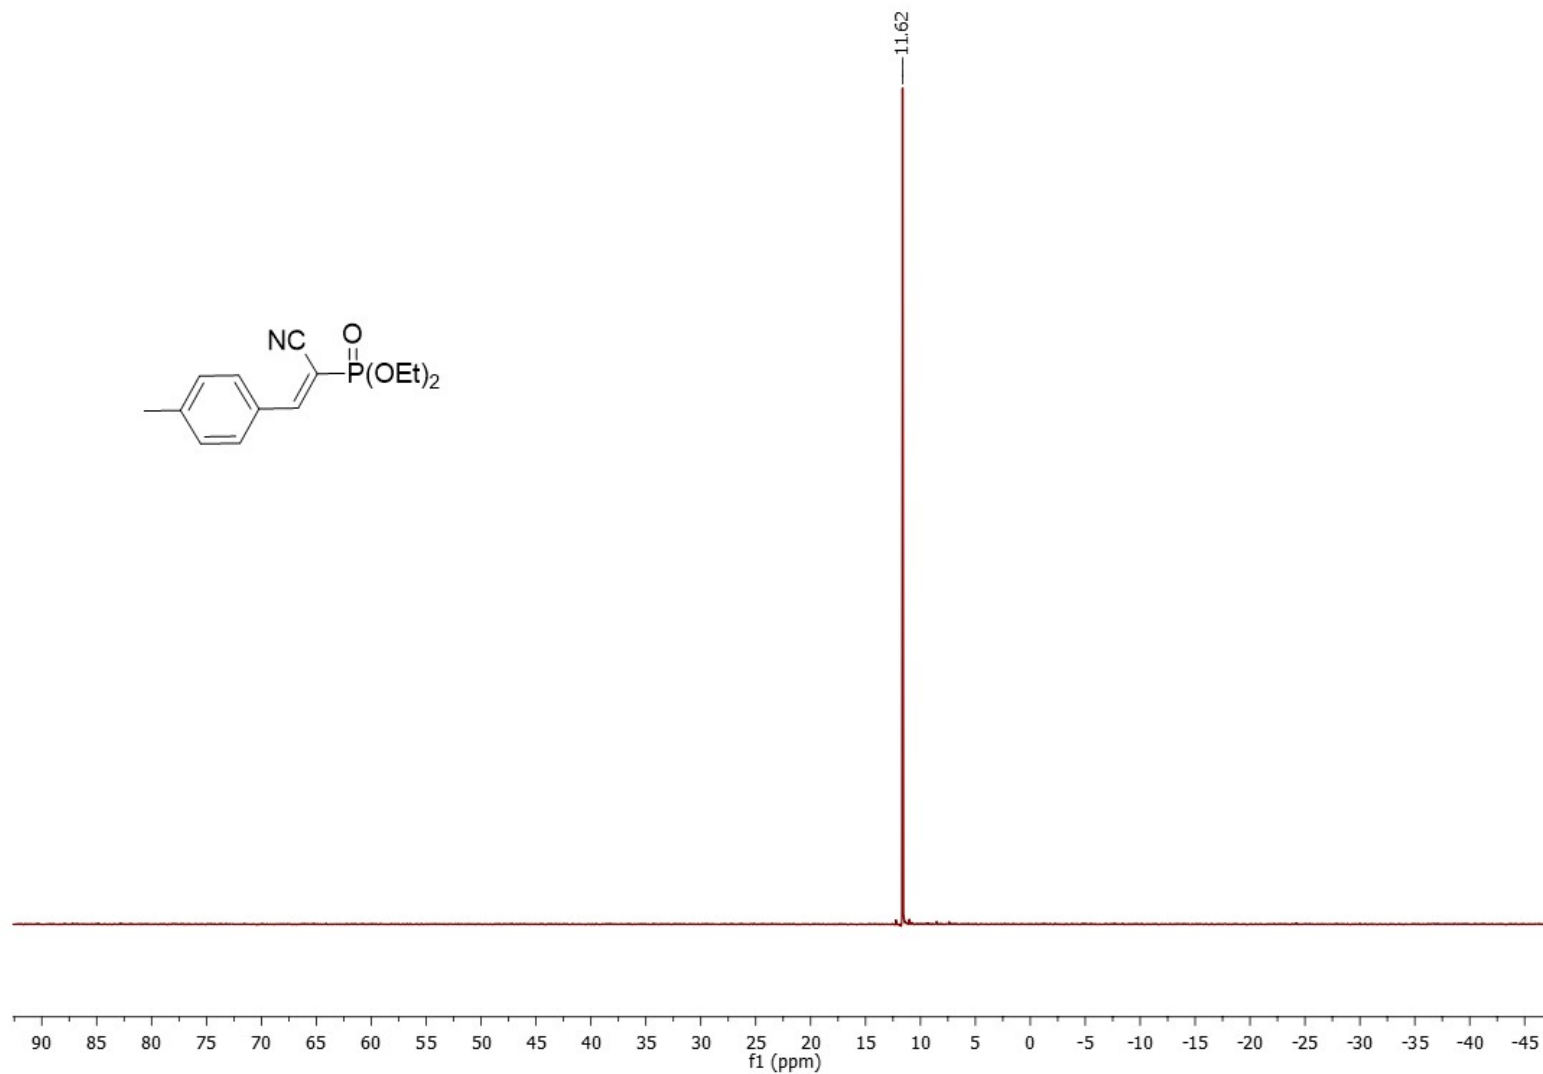

Figure S24:  $^{31}\text{P}$  NMR Spectra of 2h

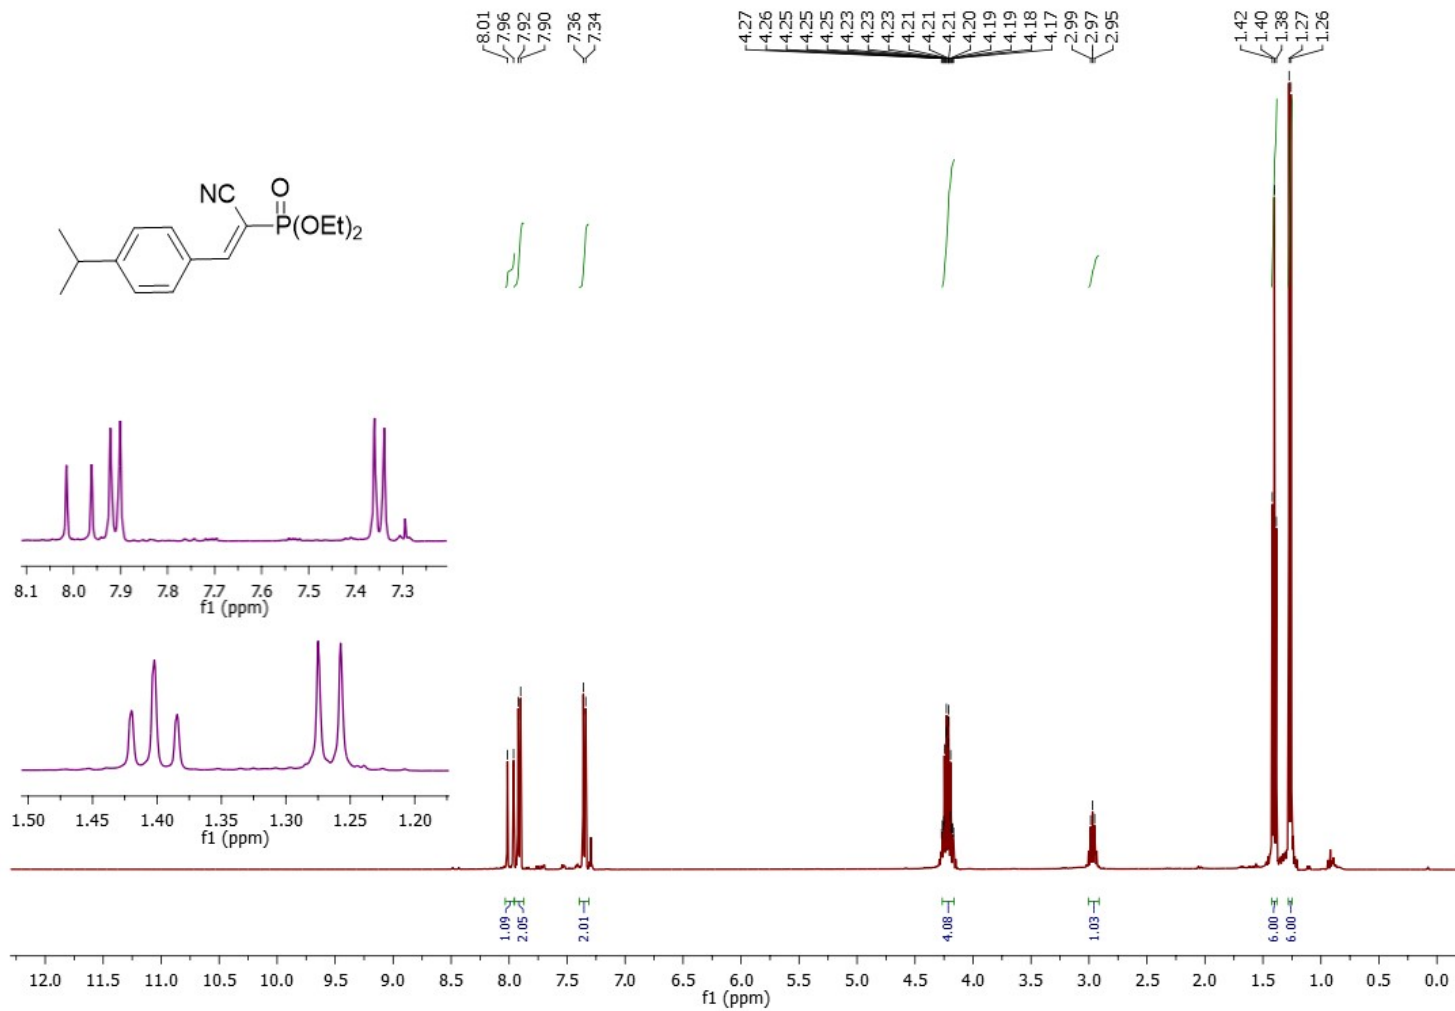

Figure S25: <sup>1</sup>H NMR Spectra of 2i

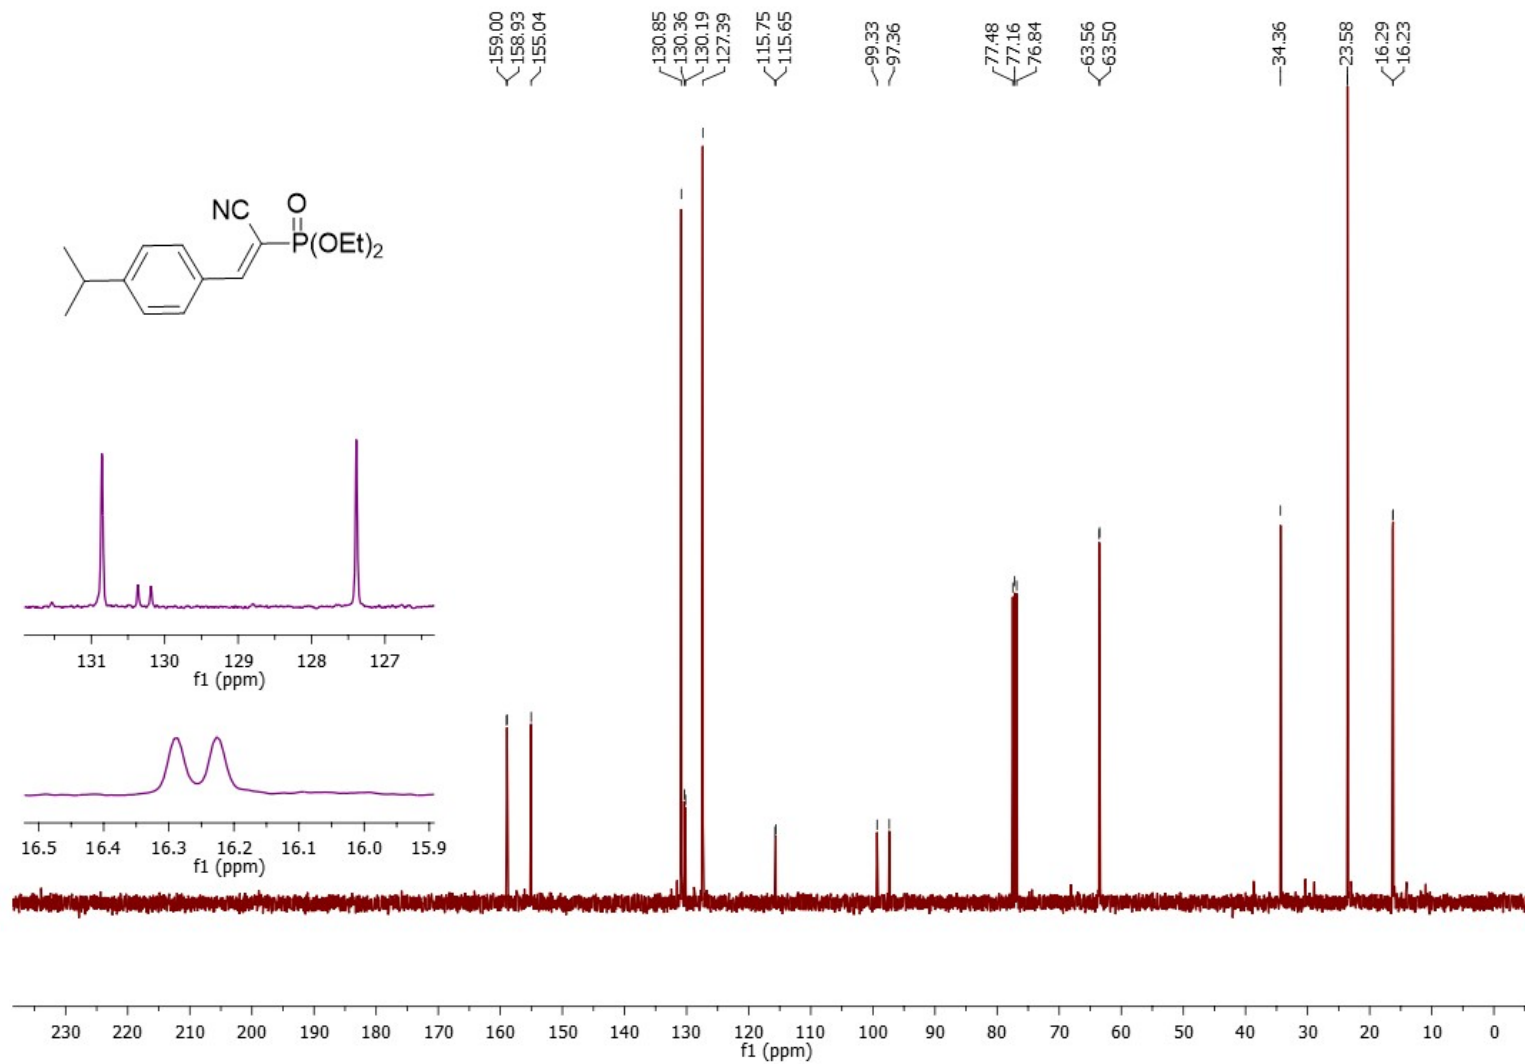

Figure S26:  $^{13}\text{C}$  NMR Spectra of 2i

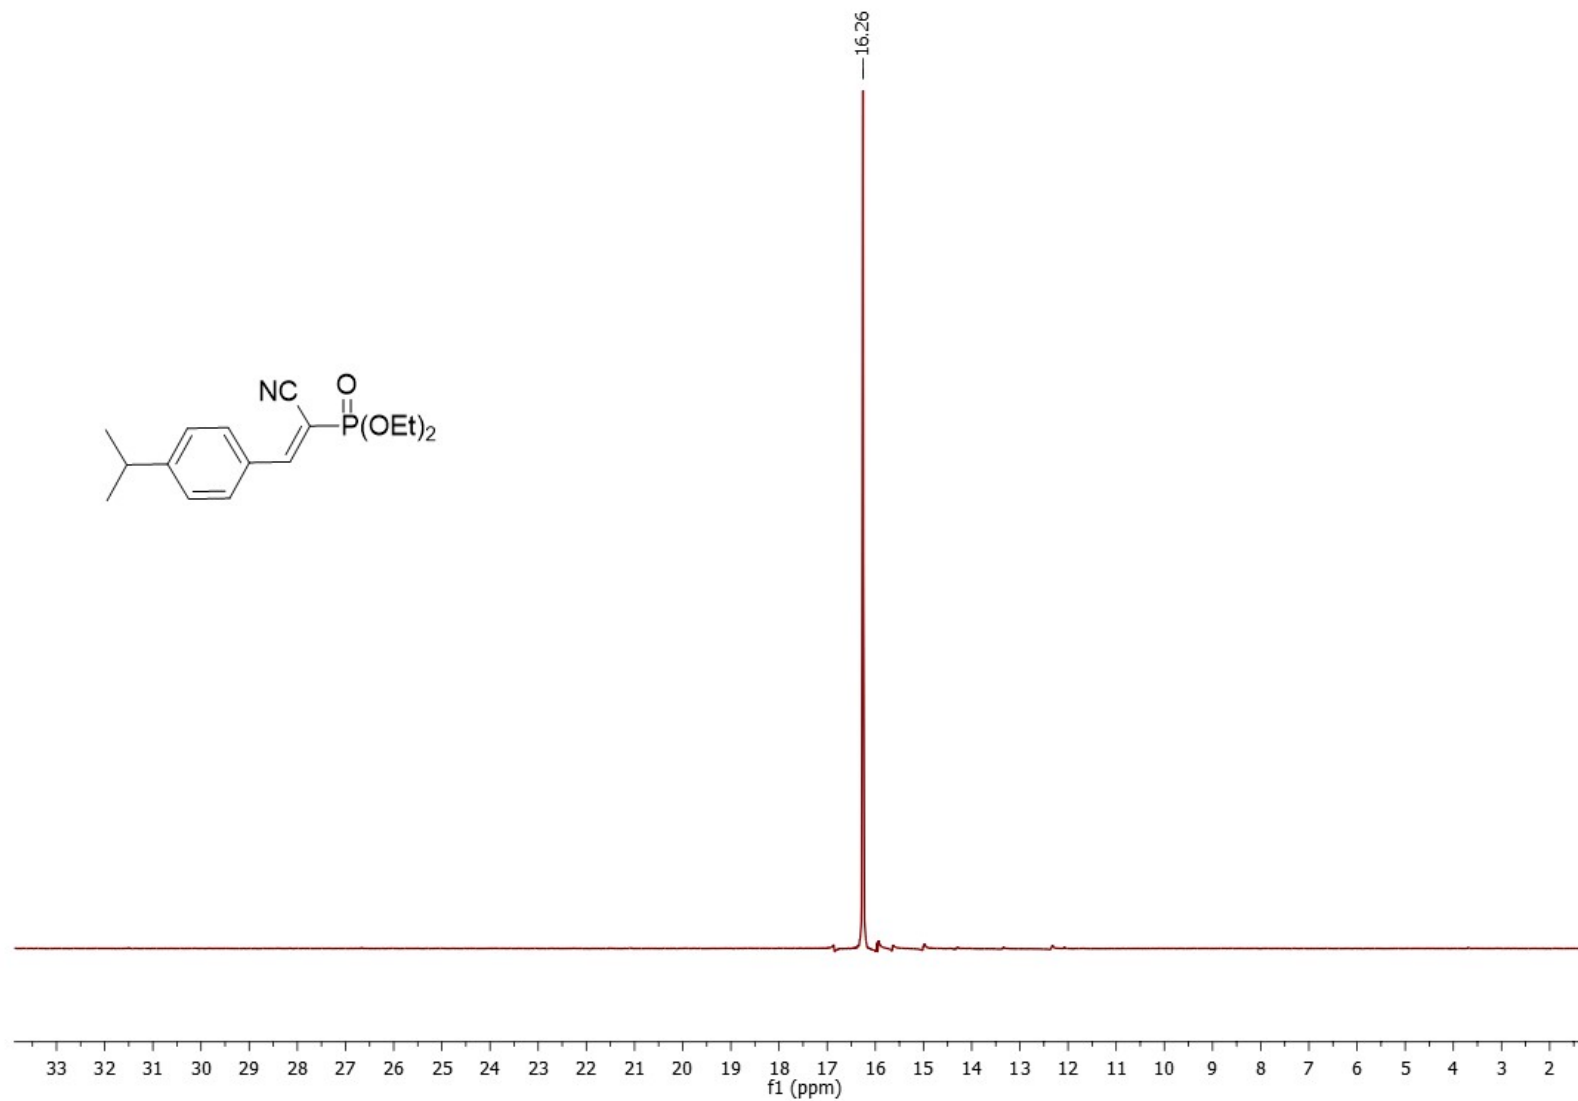

Figure S27:  $^{31}\text{P}$  NMR Spectra of 2i

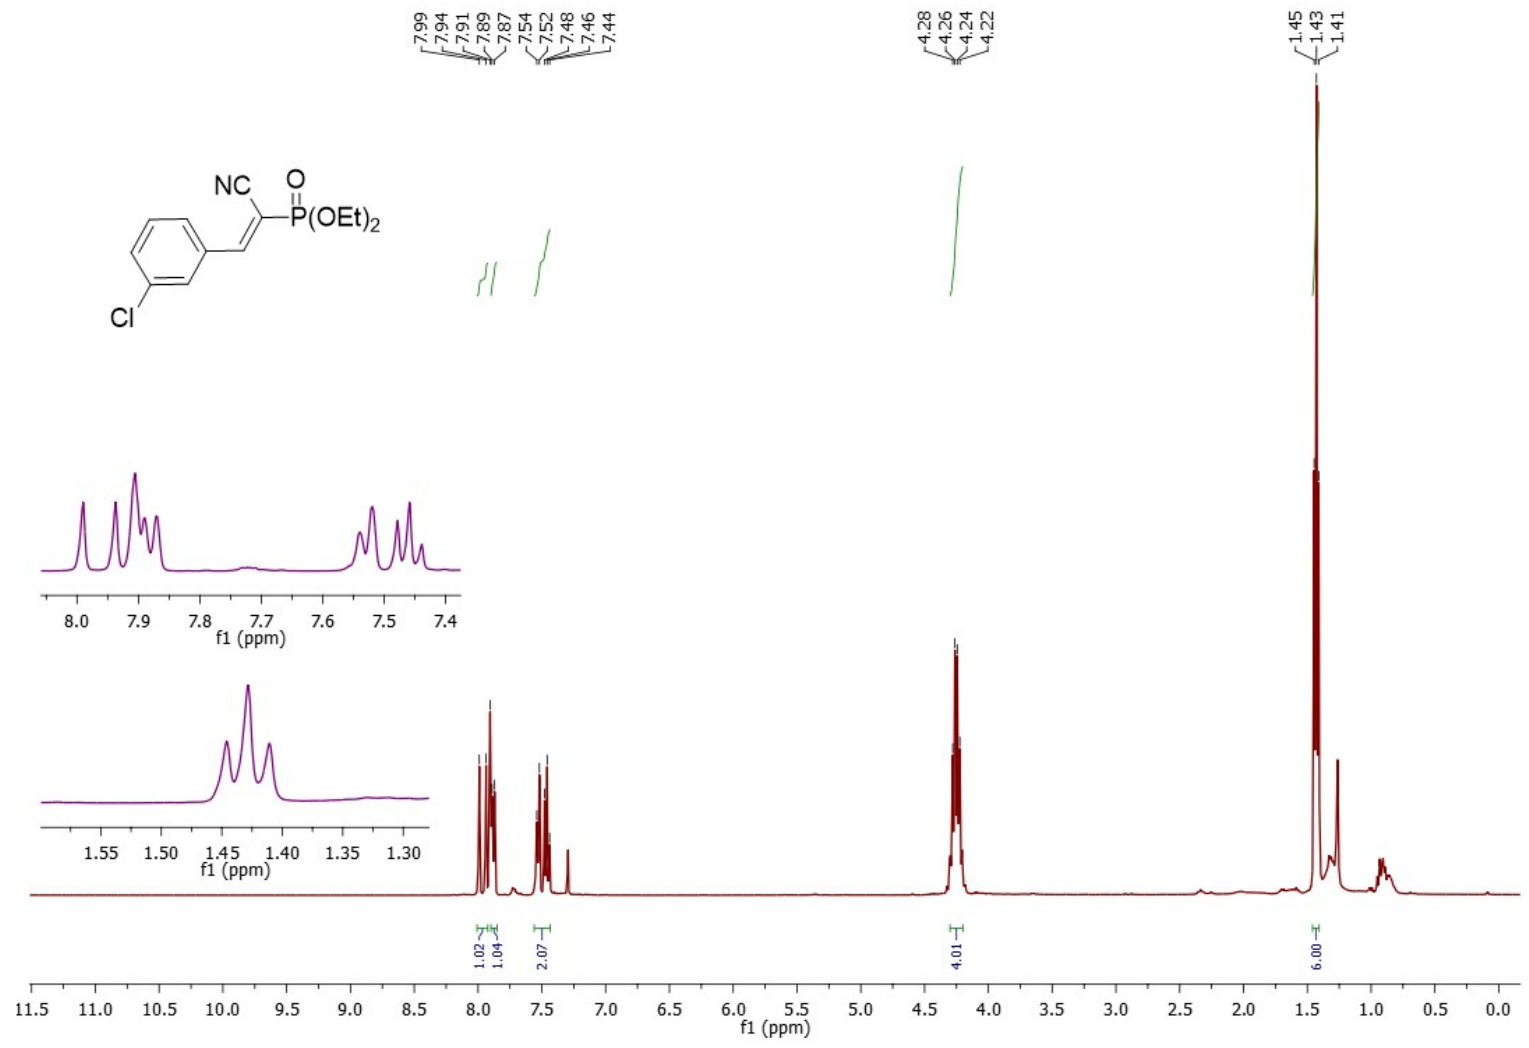

Figure S28: <sup>1</sup>H NMR Spectra of 2j



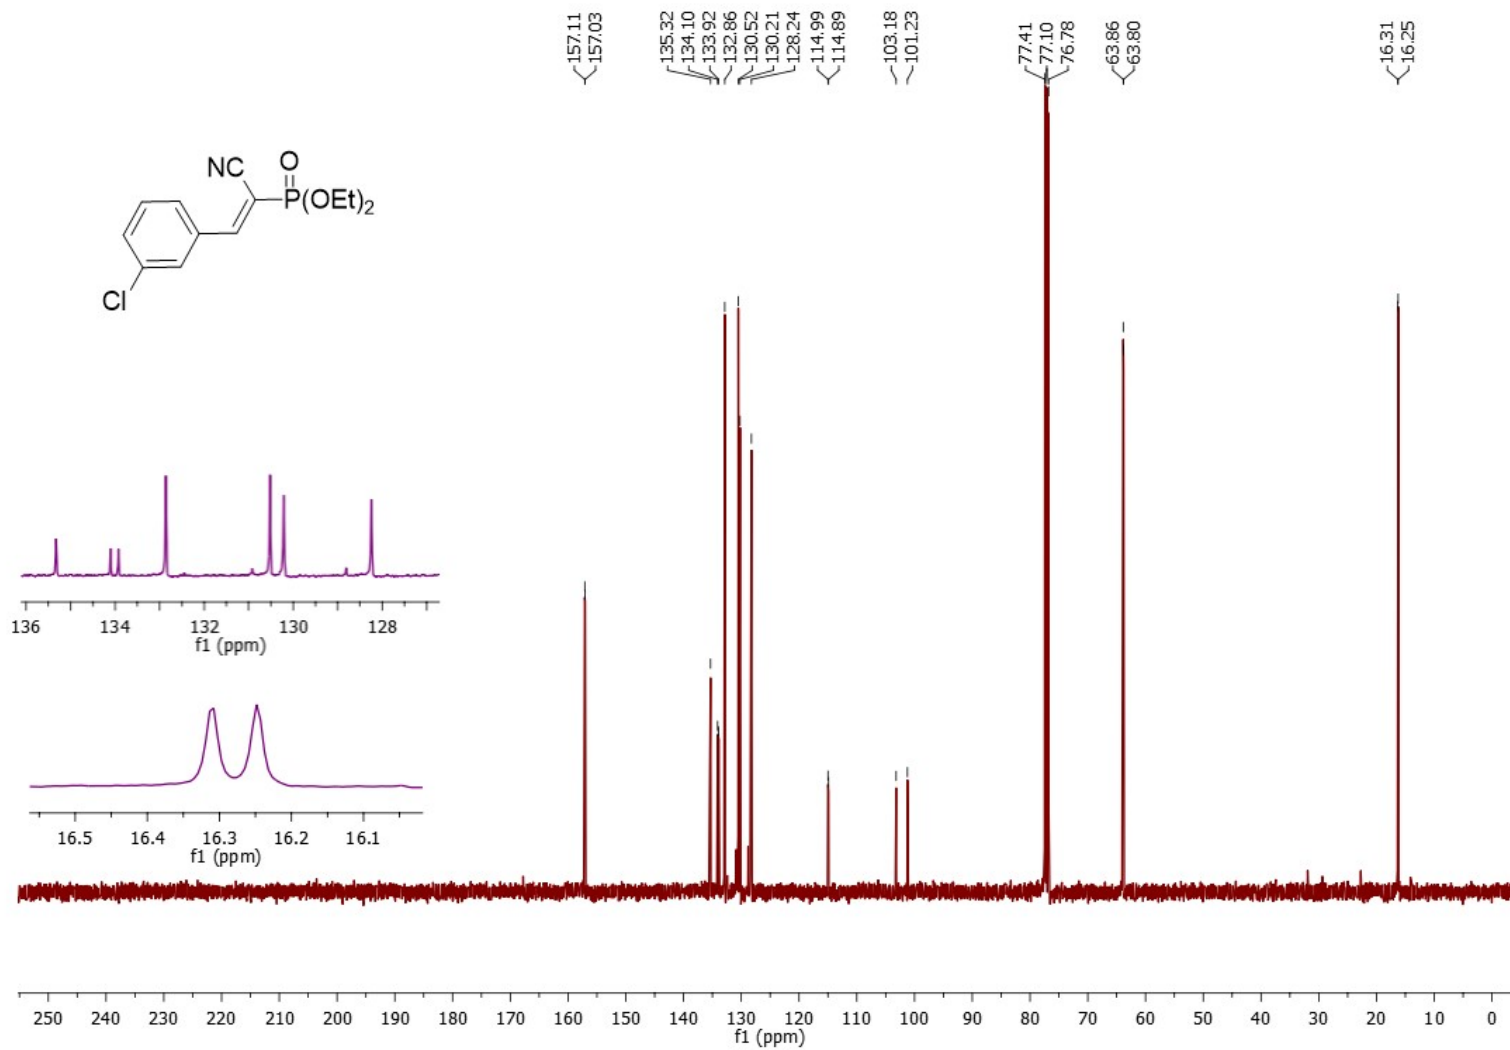

Figure S29: <sup>13</sup>C NMR Spectra of 2j

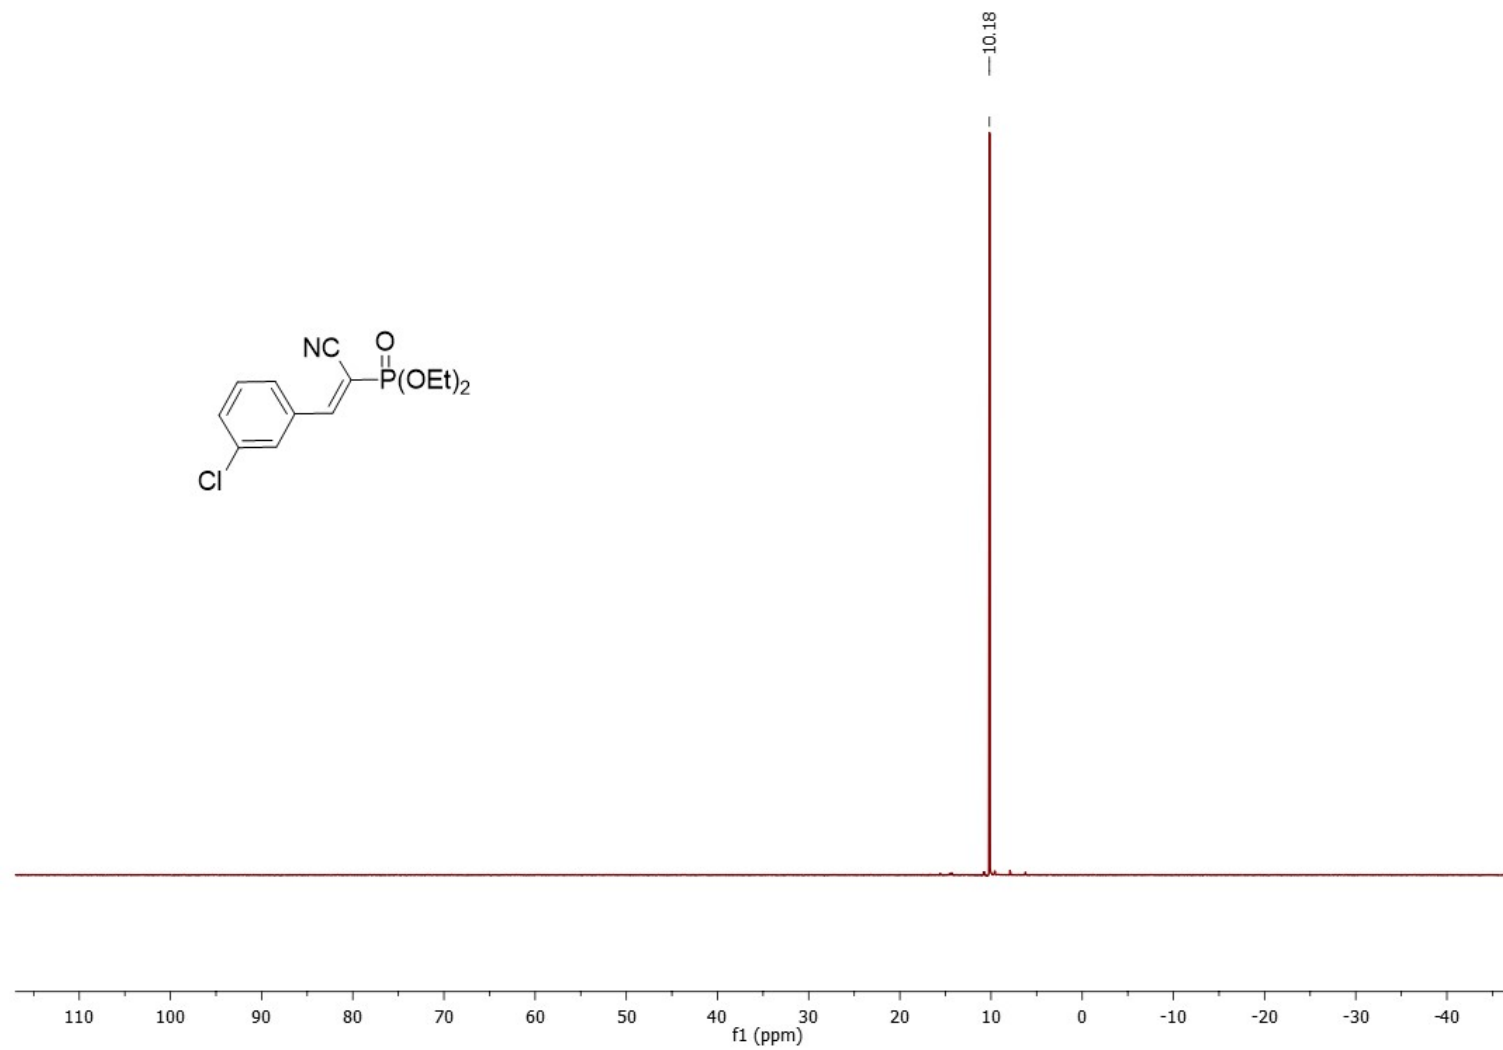

Figure S30:  $^{31}\text{P}$  NMR Spectra of 2j

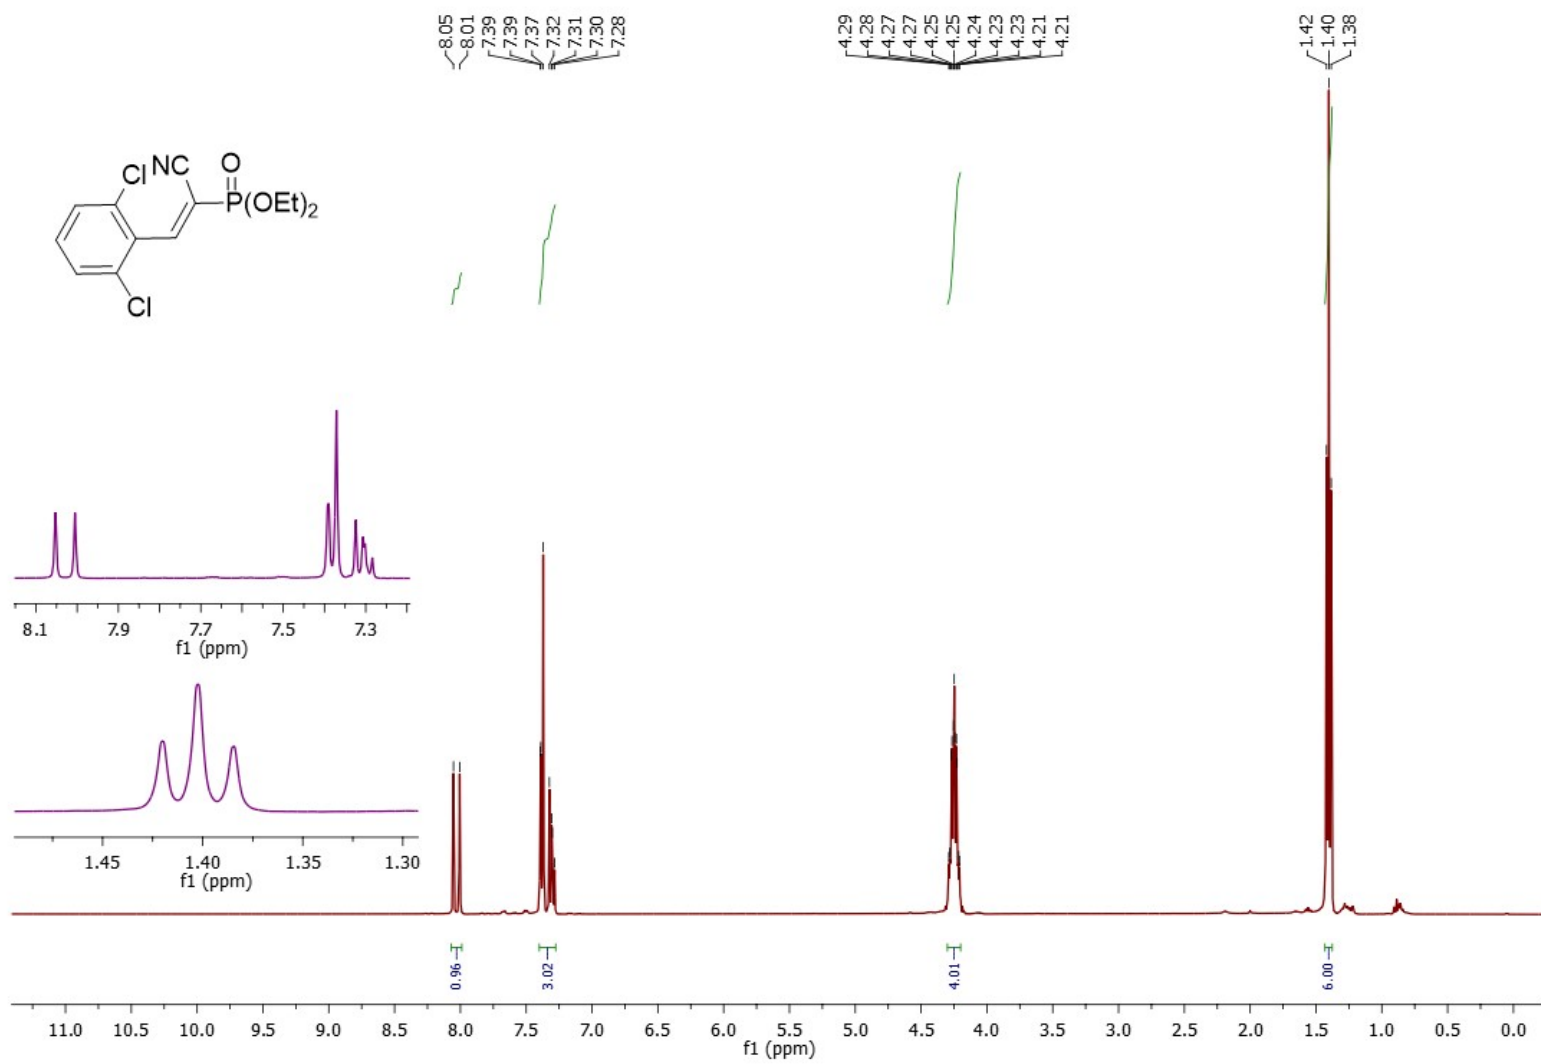

Figure S31: <sup>1</sup>H NMR Spectra of 2k

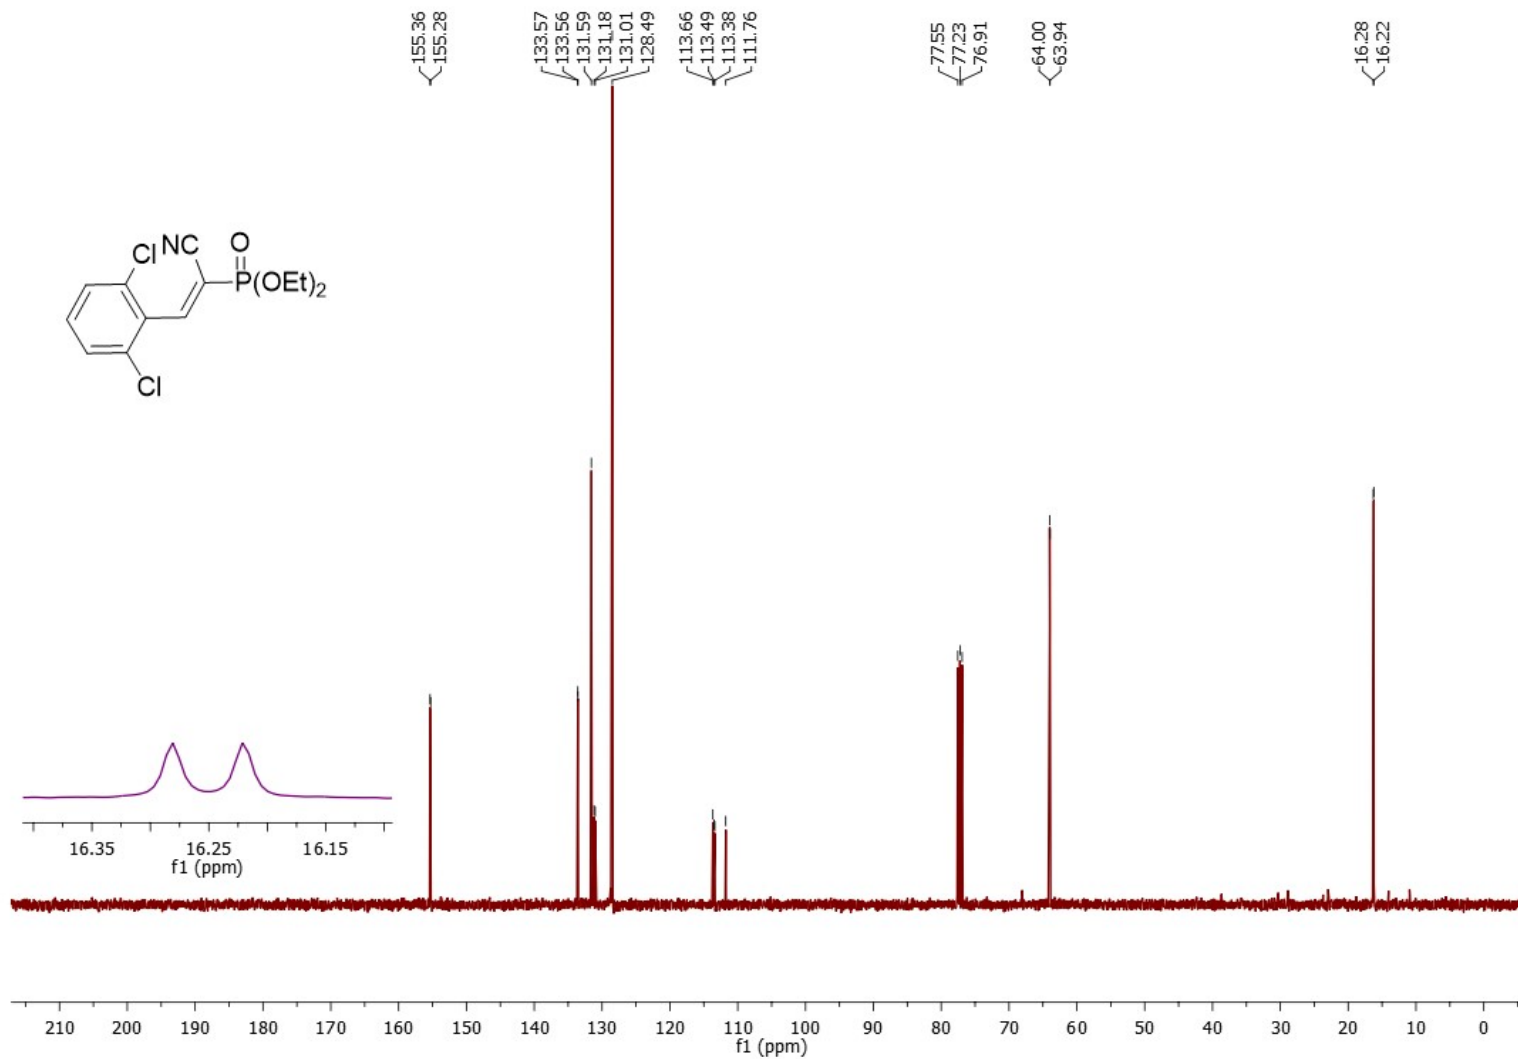

Figure S32: <sup>13</sup>C NMR Spectra of 2k

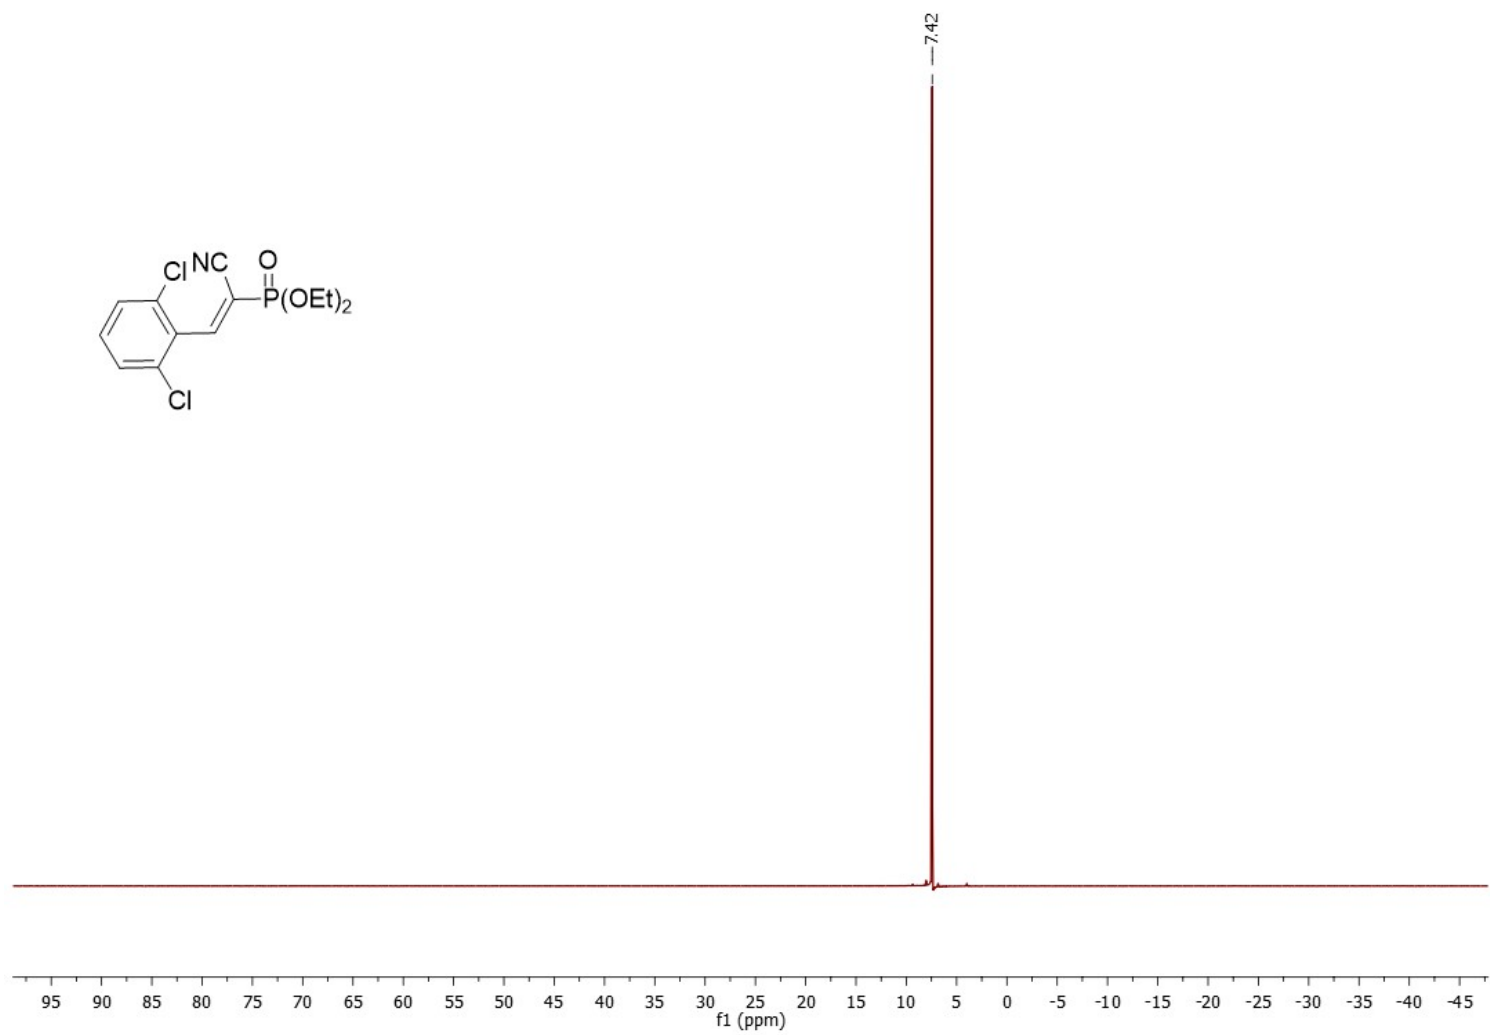

Figure S33:  $^{31}\text{P}$  NMR Spectra of 2k

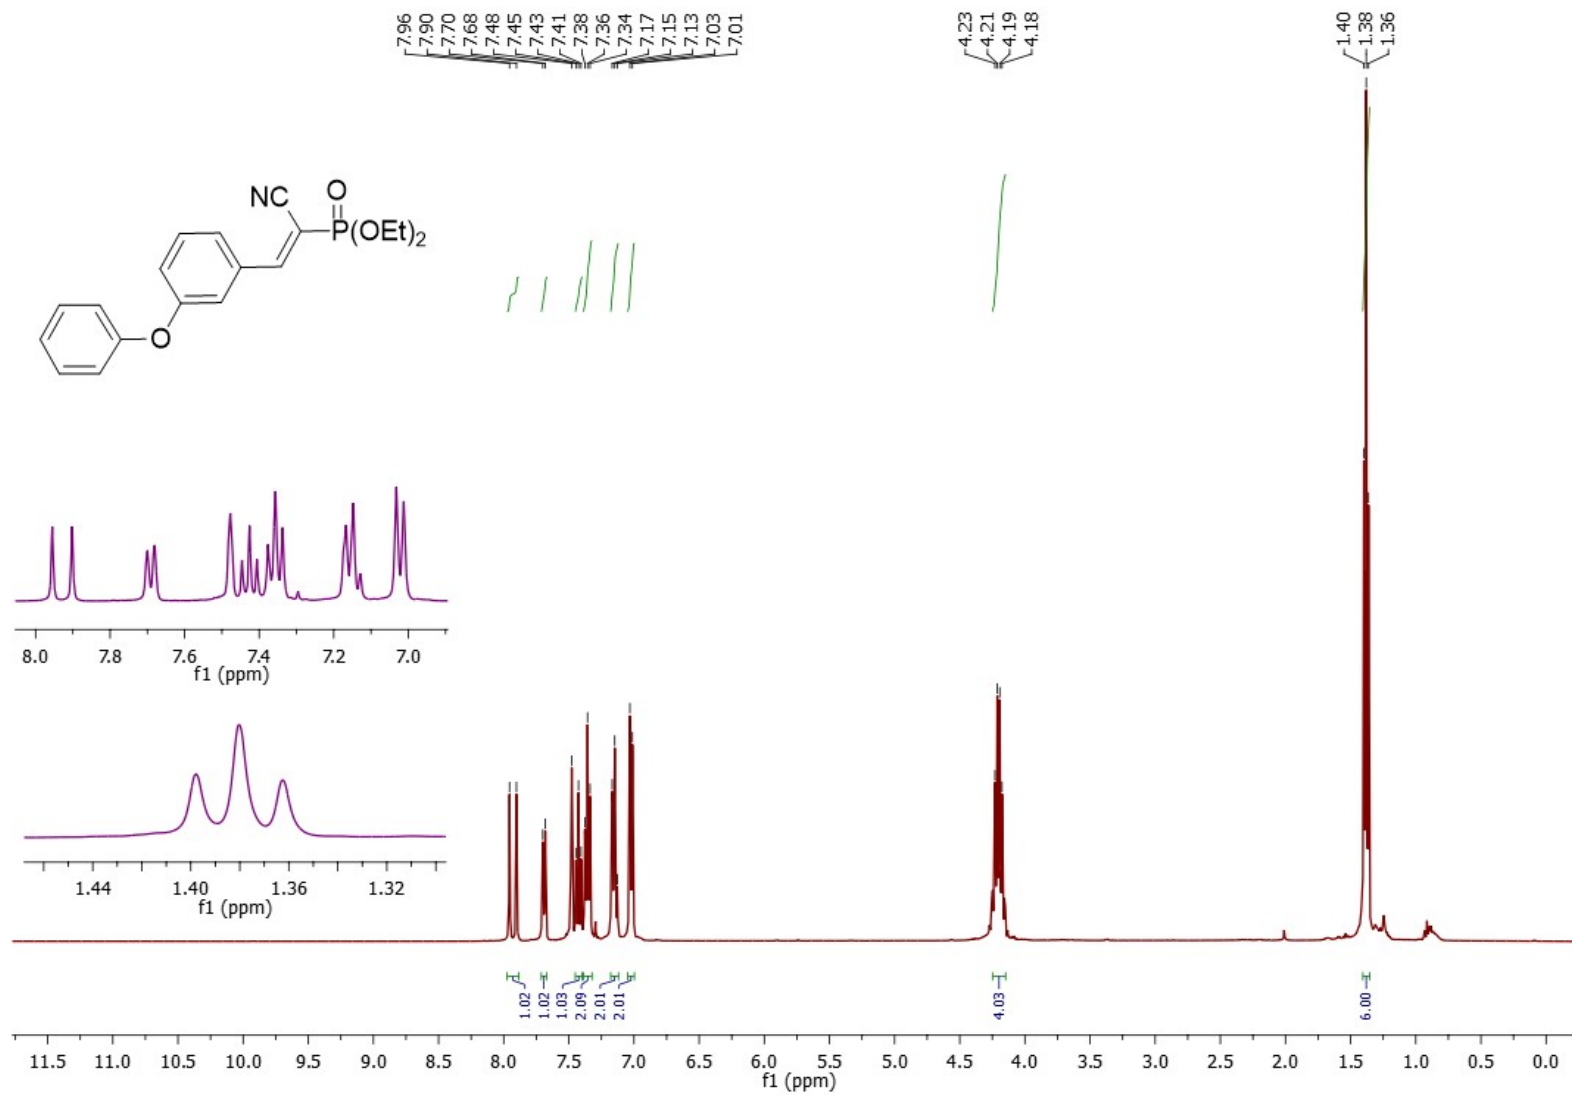

Figure S34: <sup>1</sup>H NMR Spectra of 21

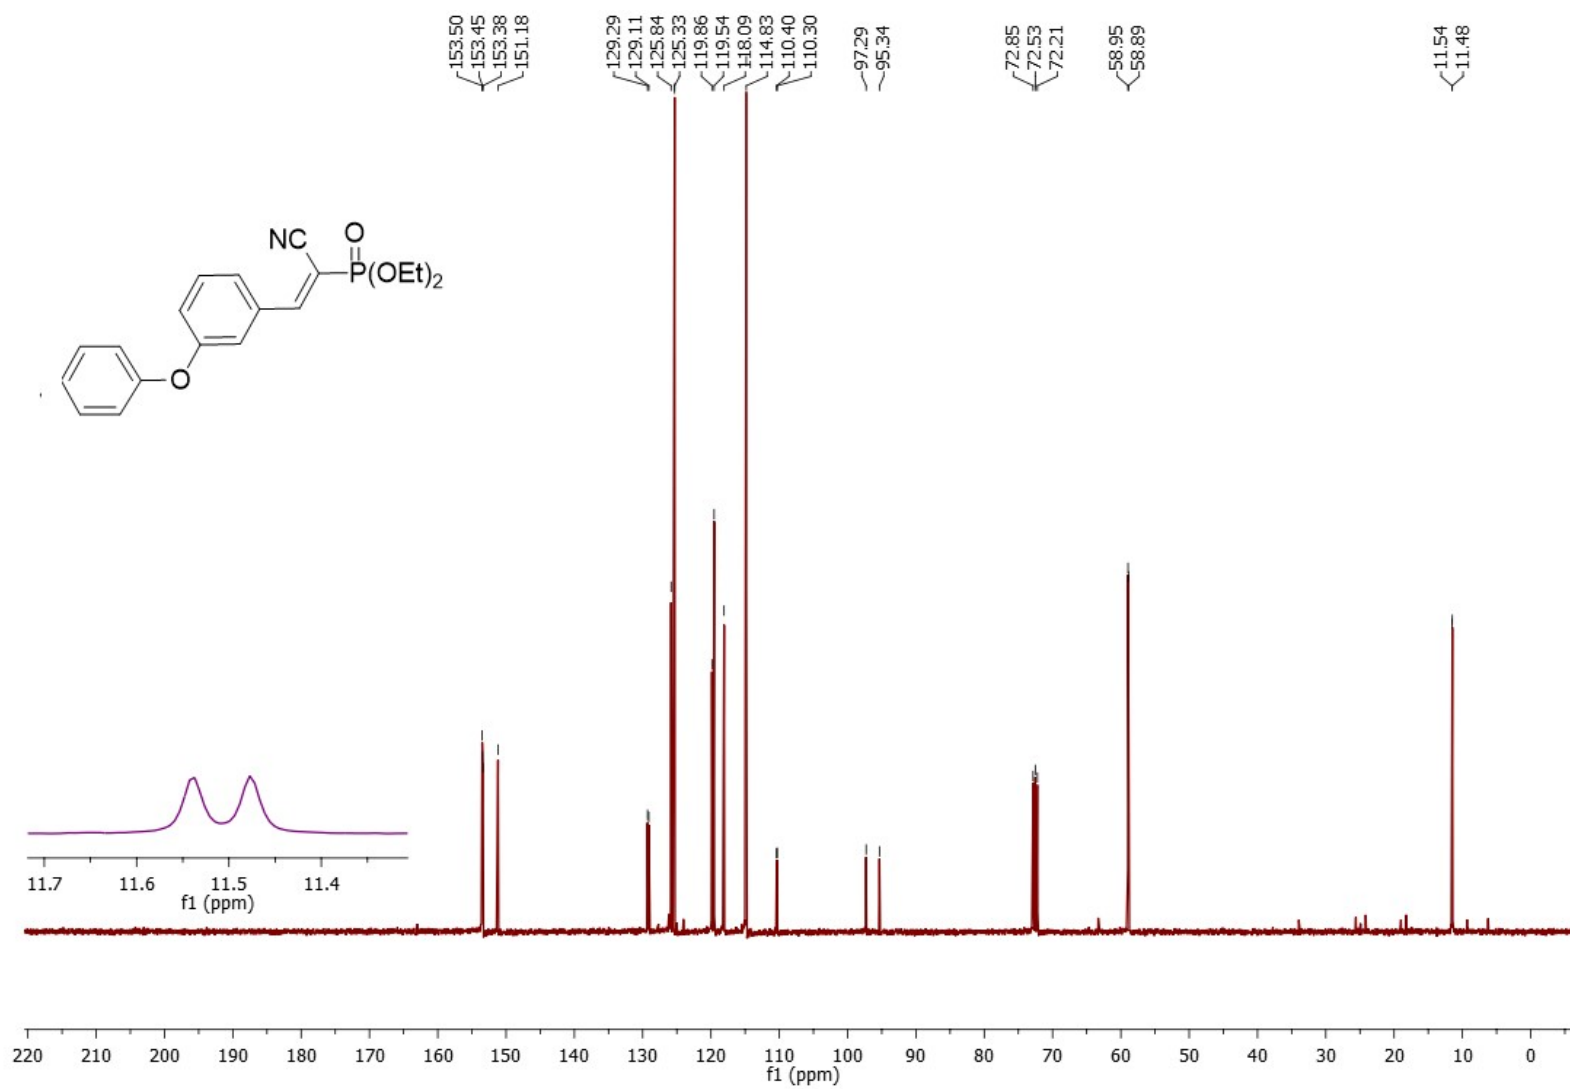

Figure S35: <sup>13</sup>C NMR Spectra of 2l

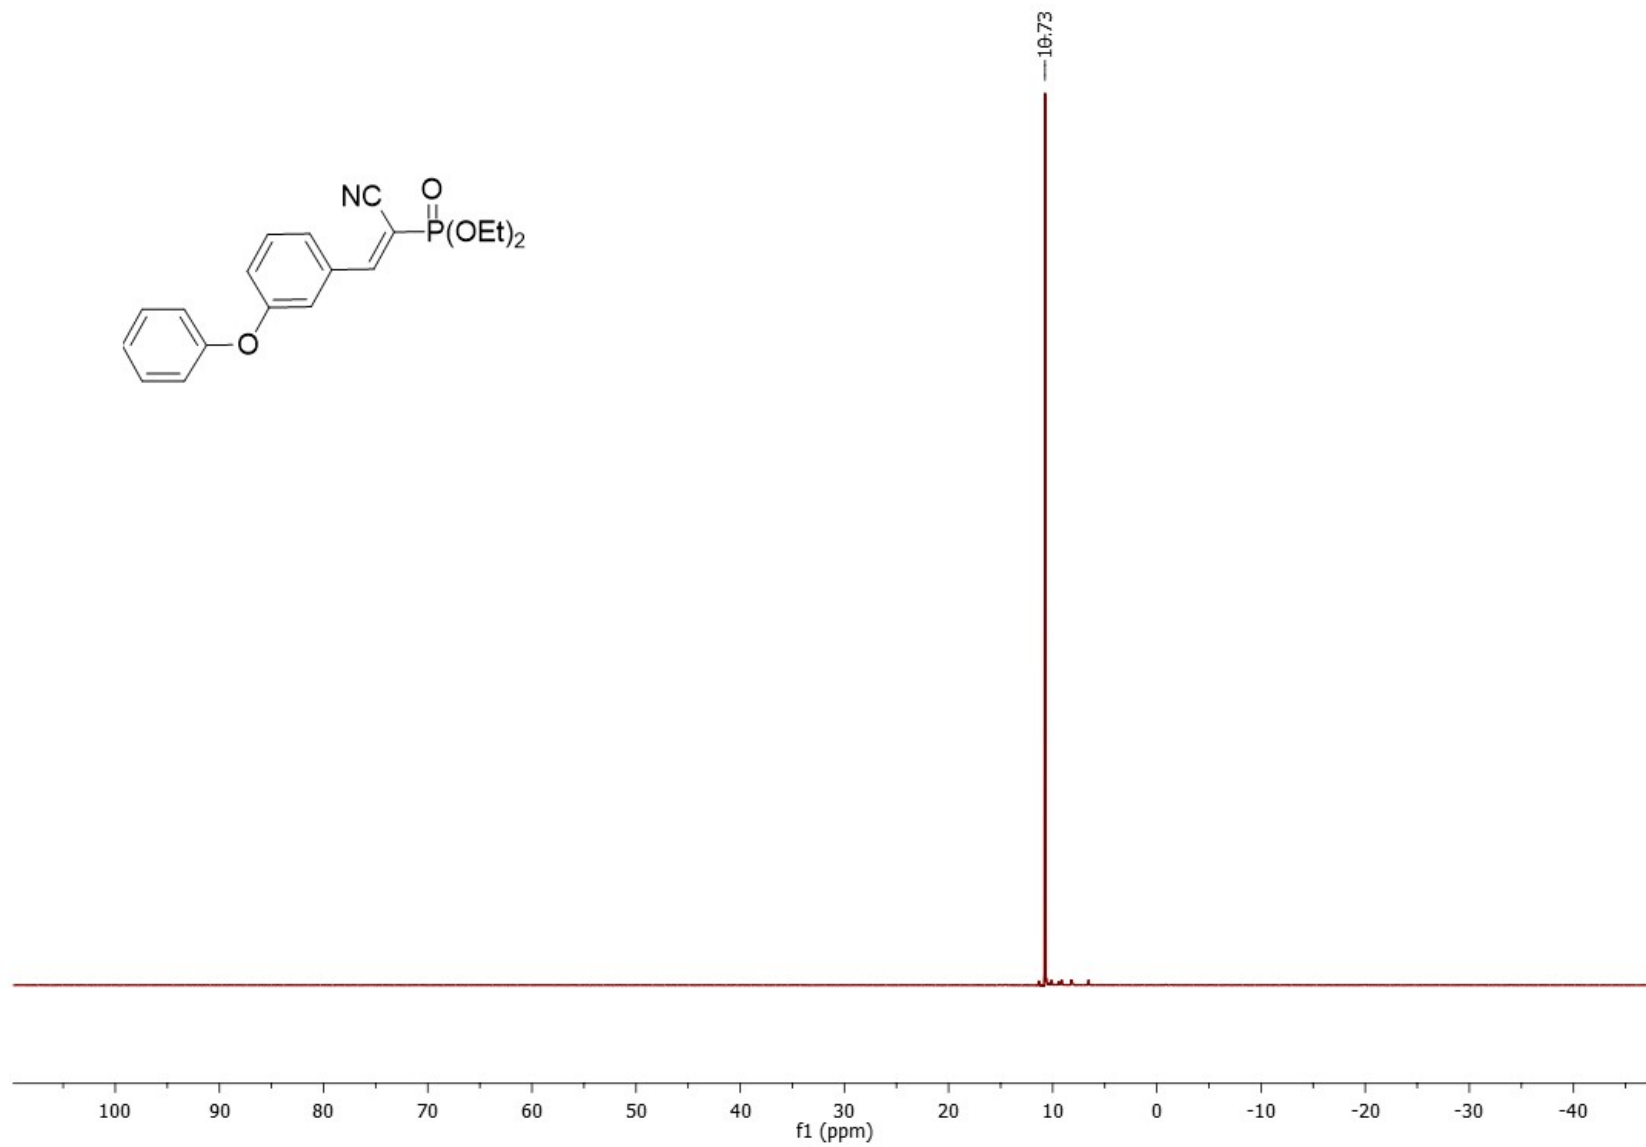

Figure S36:  $^{31}\text{P}$ NMR Spectra of 21



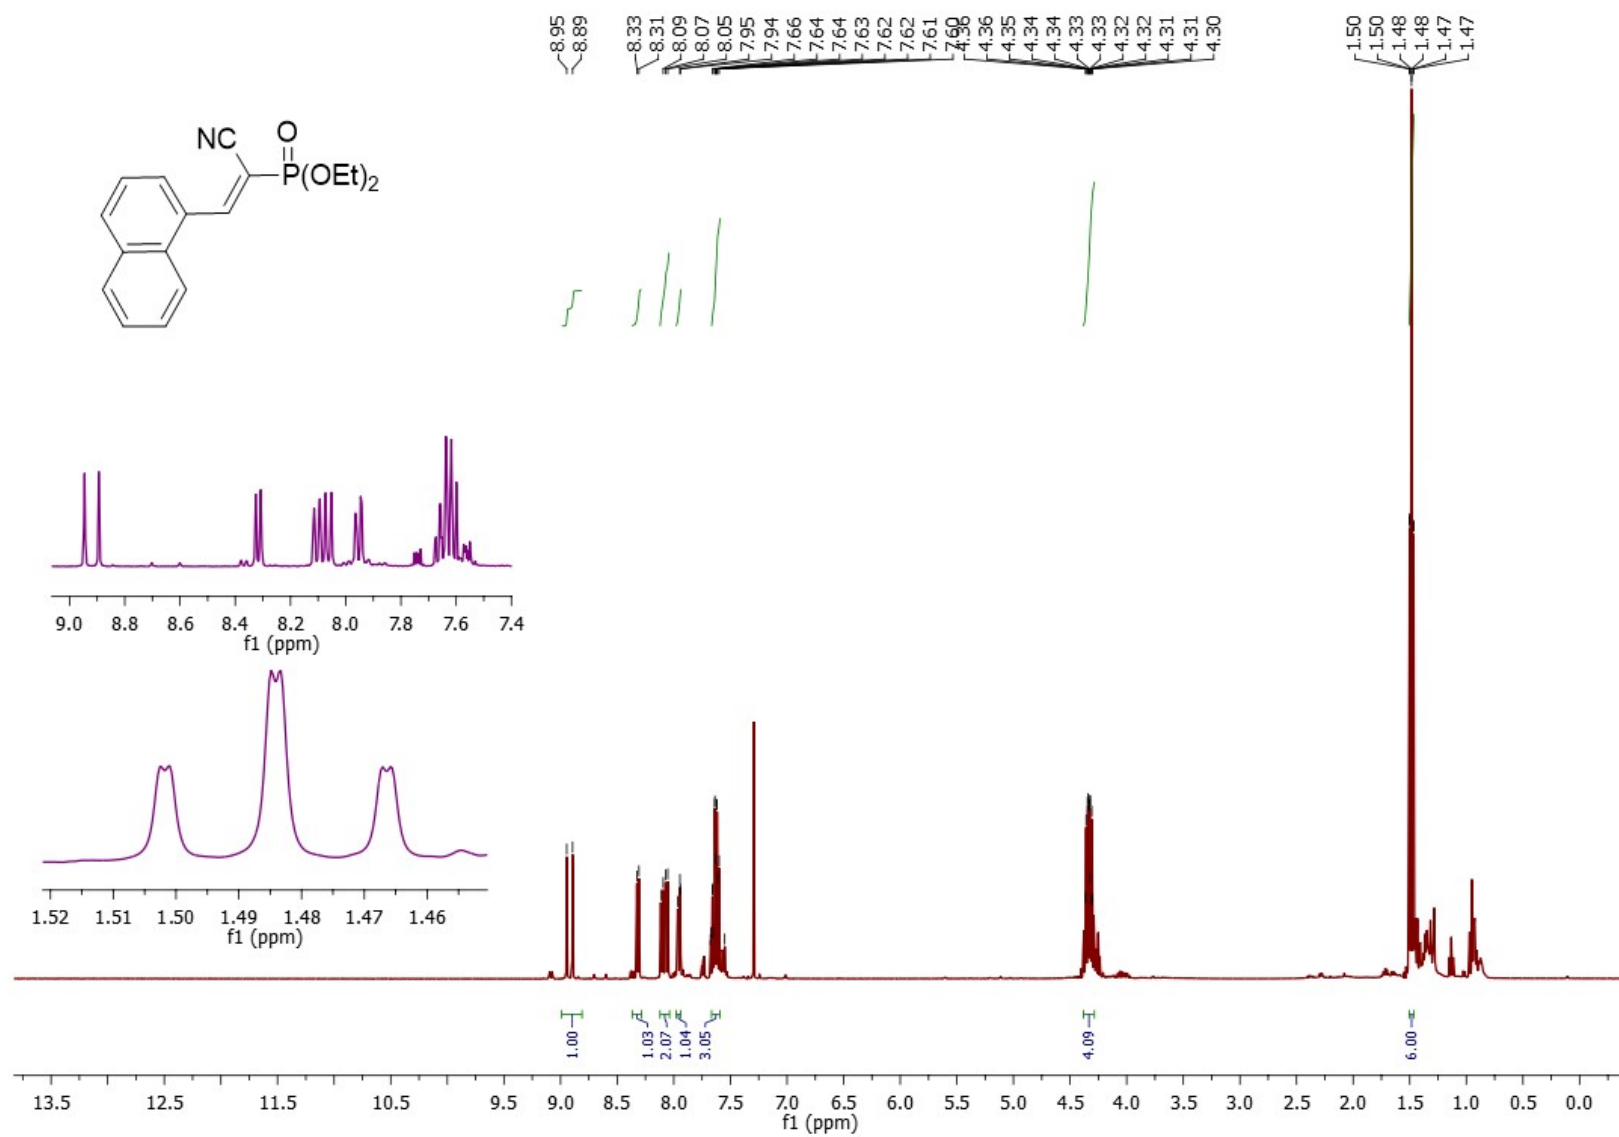

Figure S37: <sup>1</sup>H NMR Spectra of 2m

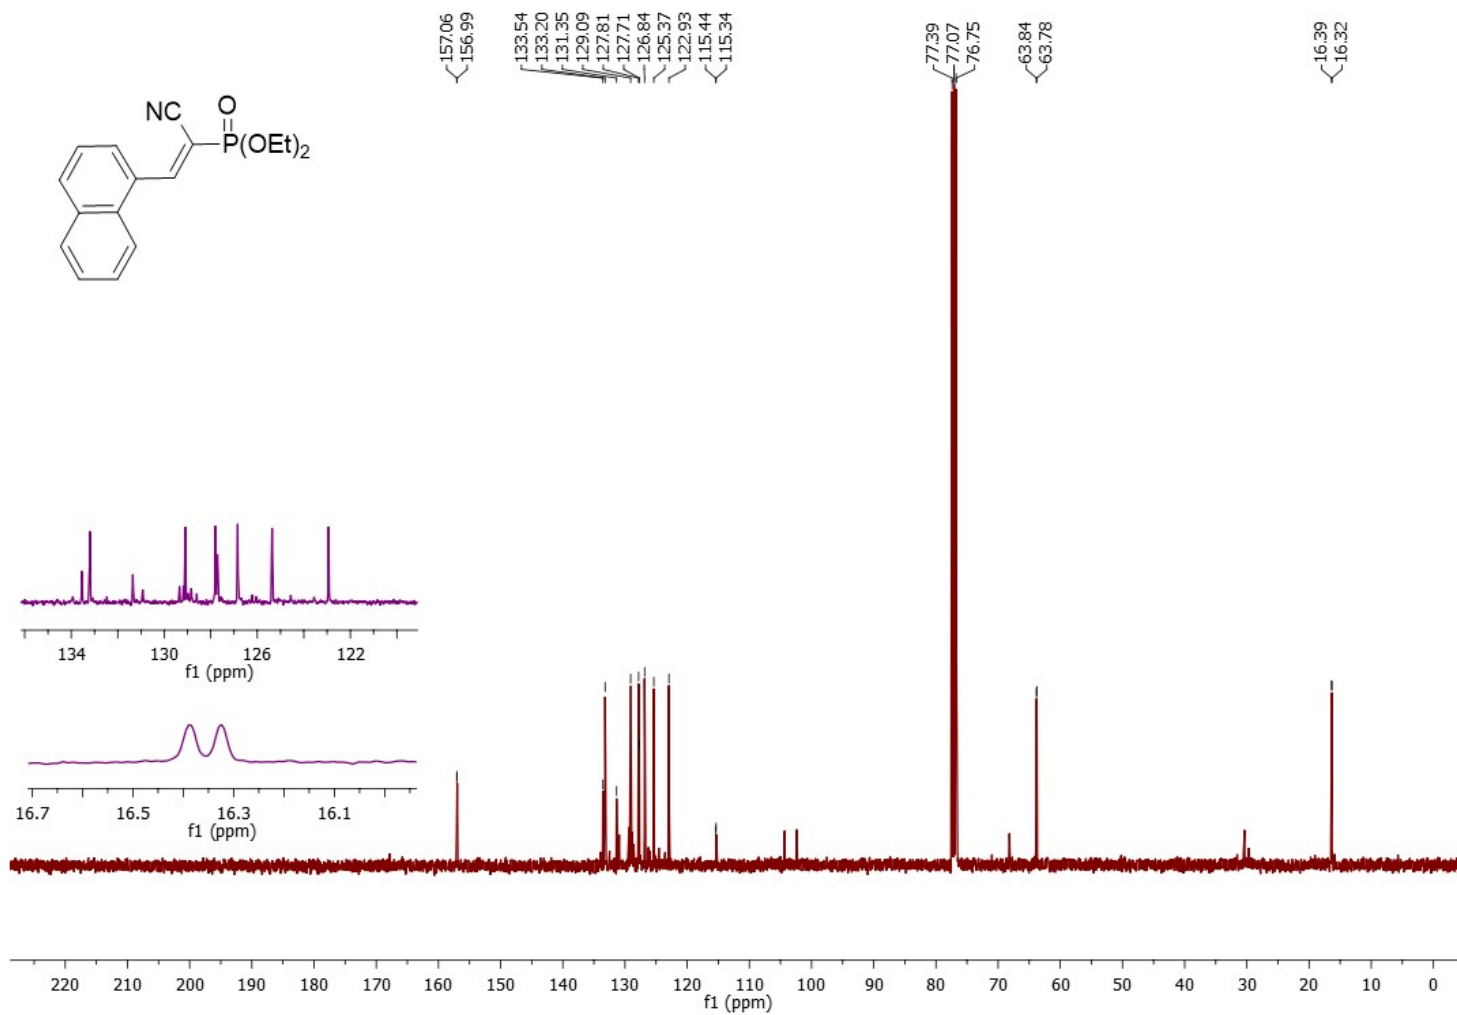

Figure S38: <sup>13</sup>C NMR Spectra of 2m

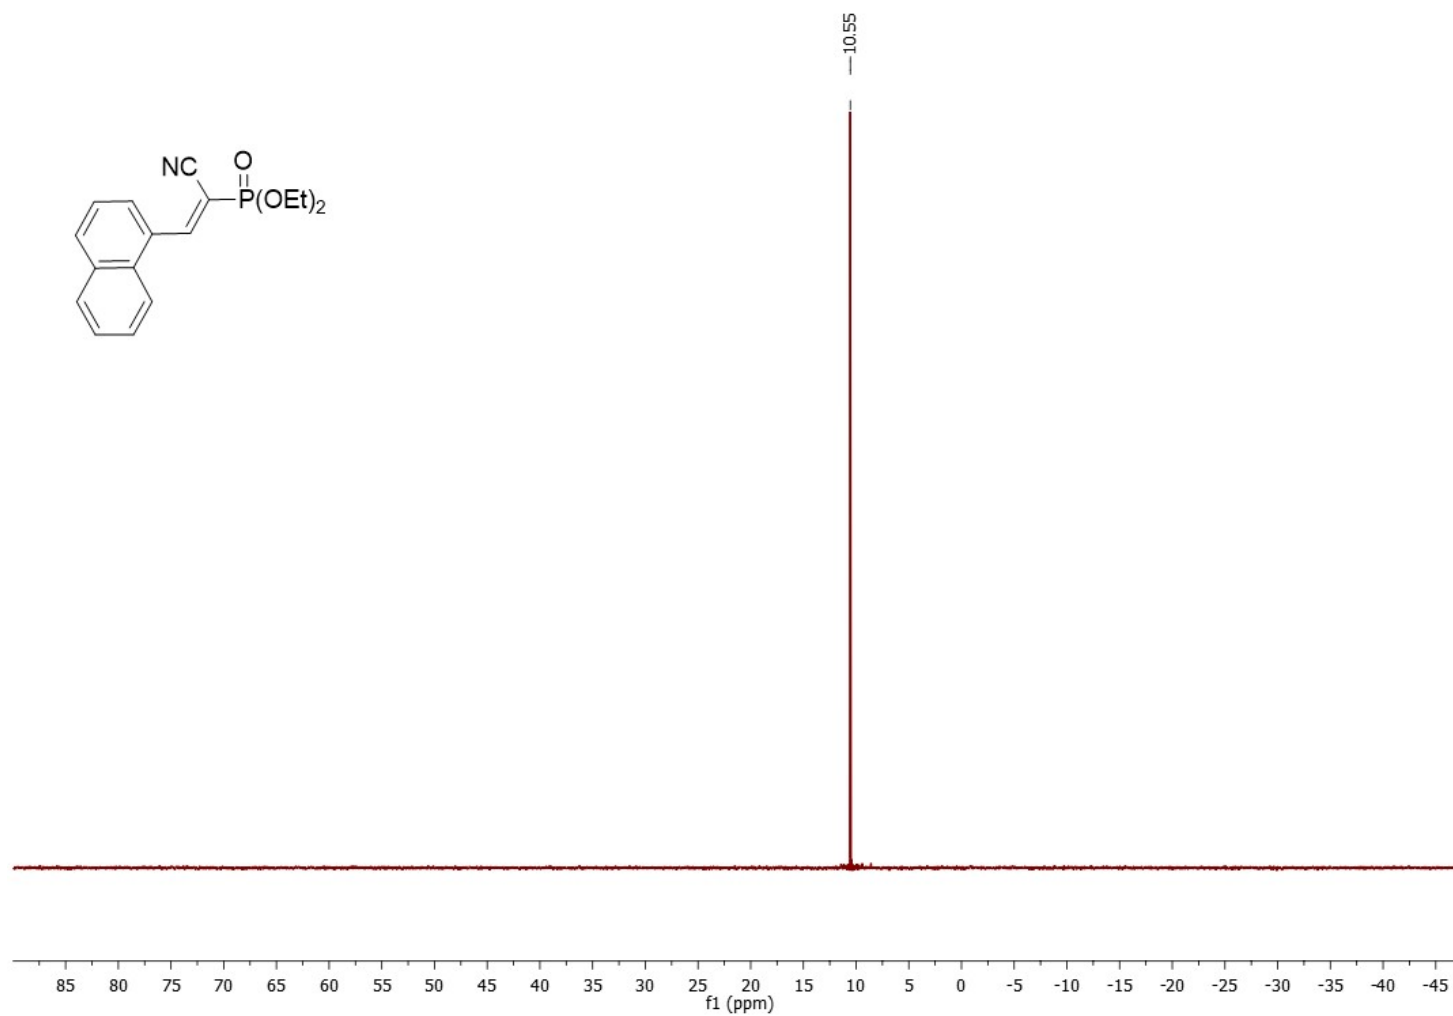

Figure S39:  $^{31}\text{P}$  NMR Spectra of 2m

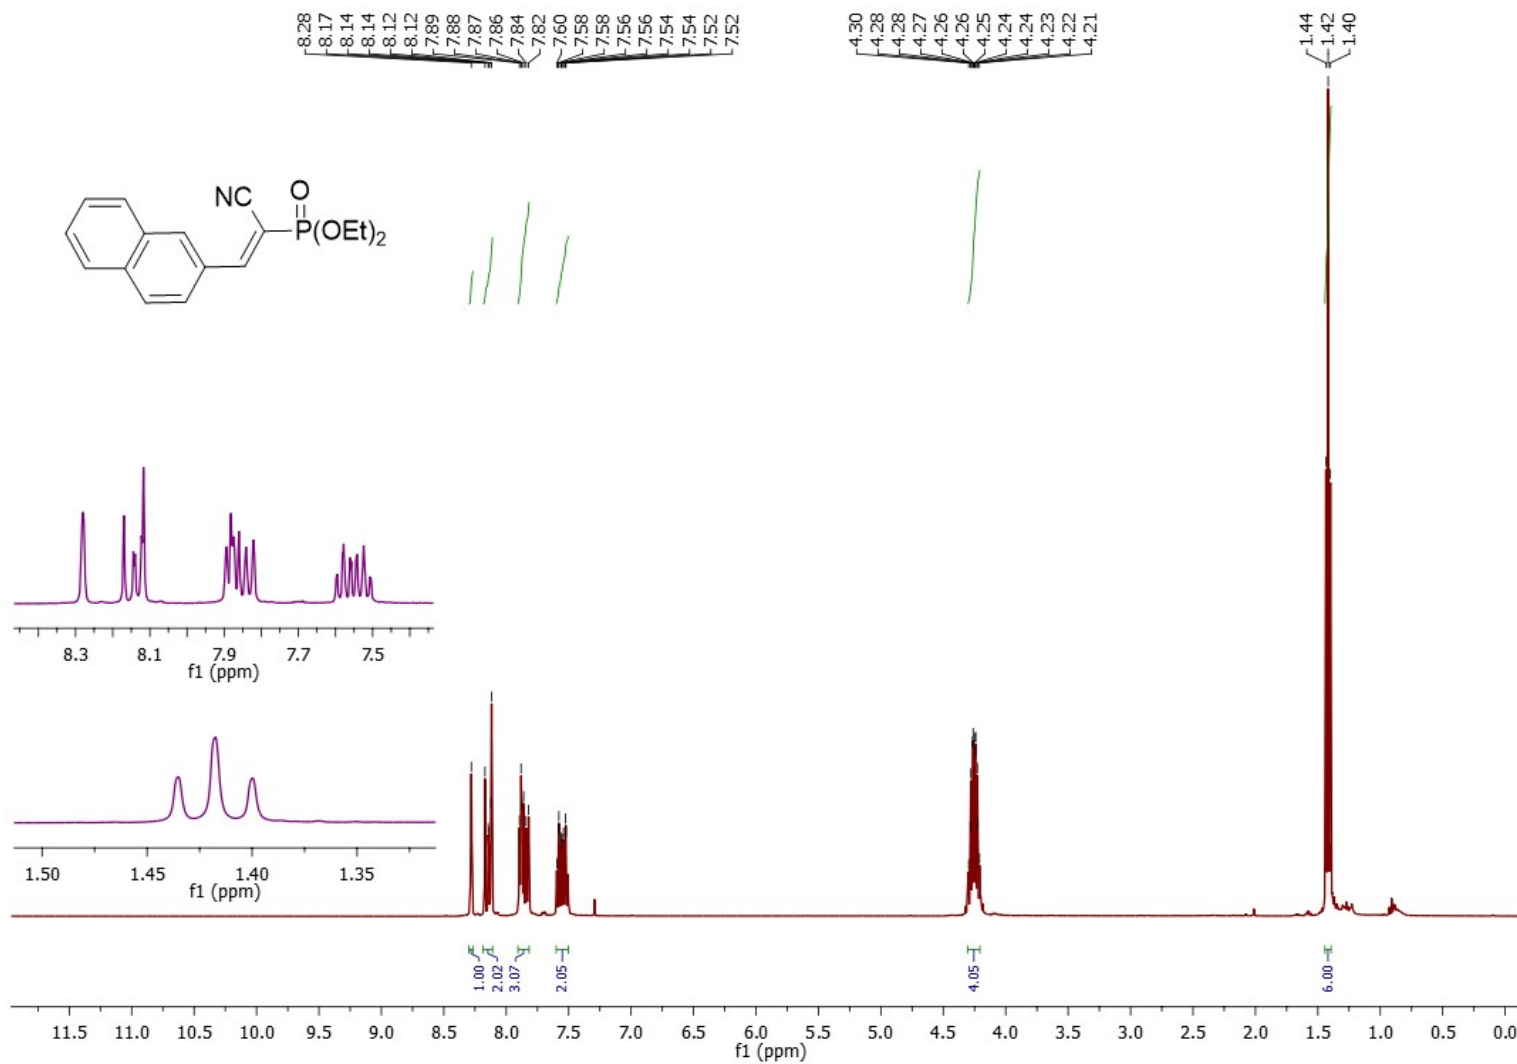

Figure S40: <sup>1</sup>H NMR Spectra of 2n

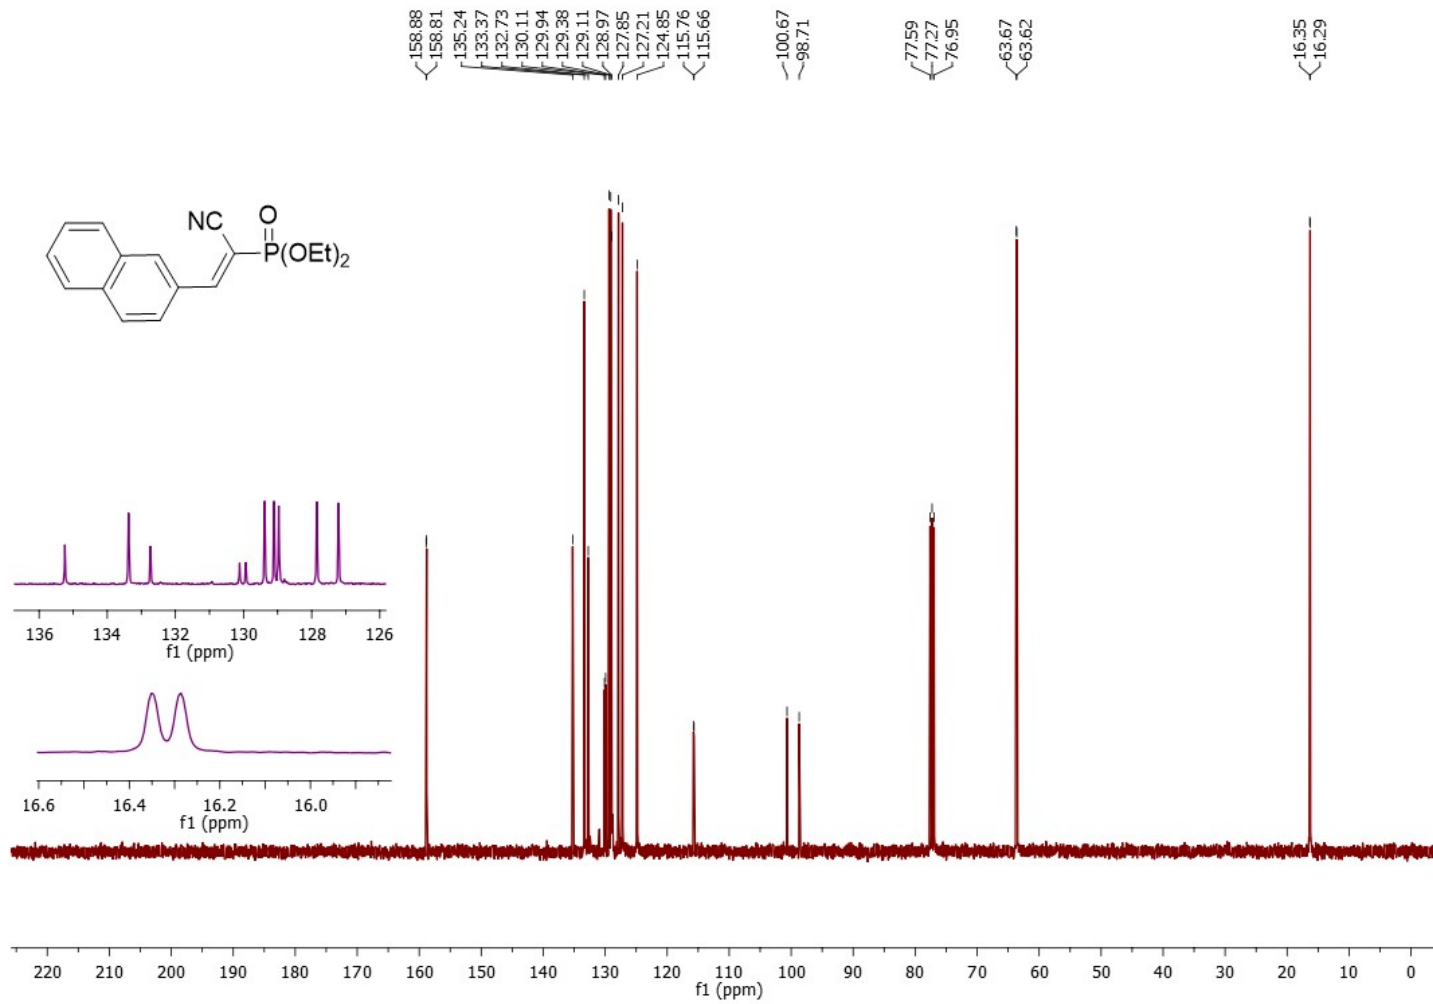

Figure S41:  $^{13}\text{C}$  NMR Spectra of 2n

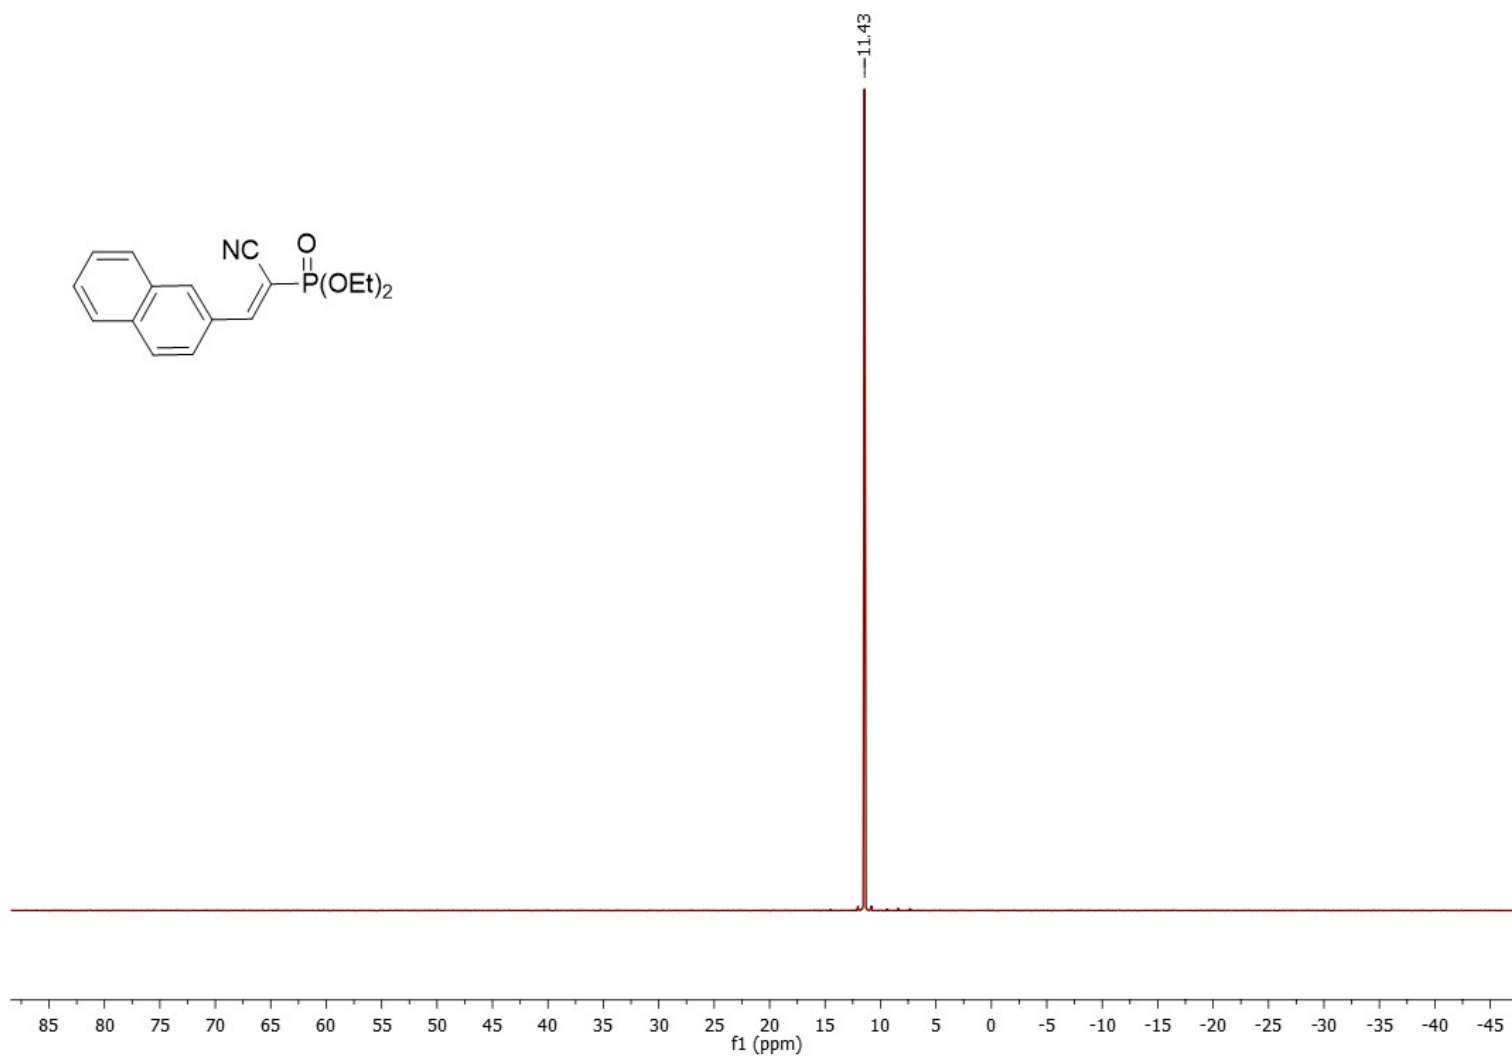

Figure S42:  $^{31}\text{P}$  NMR Spectra of 2n

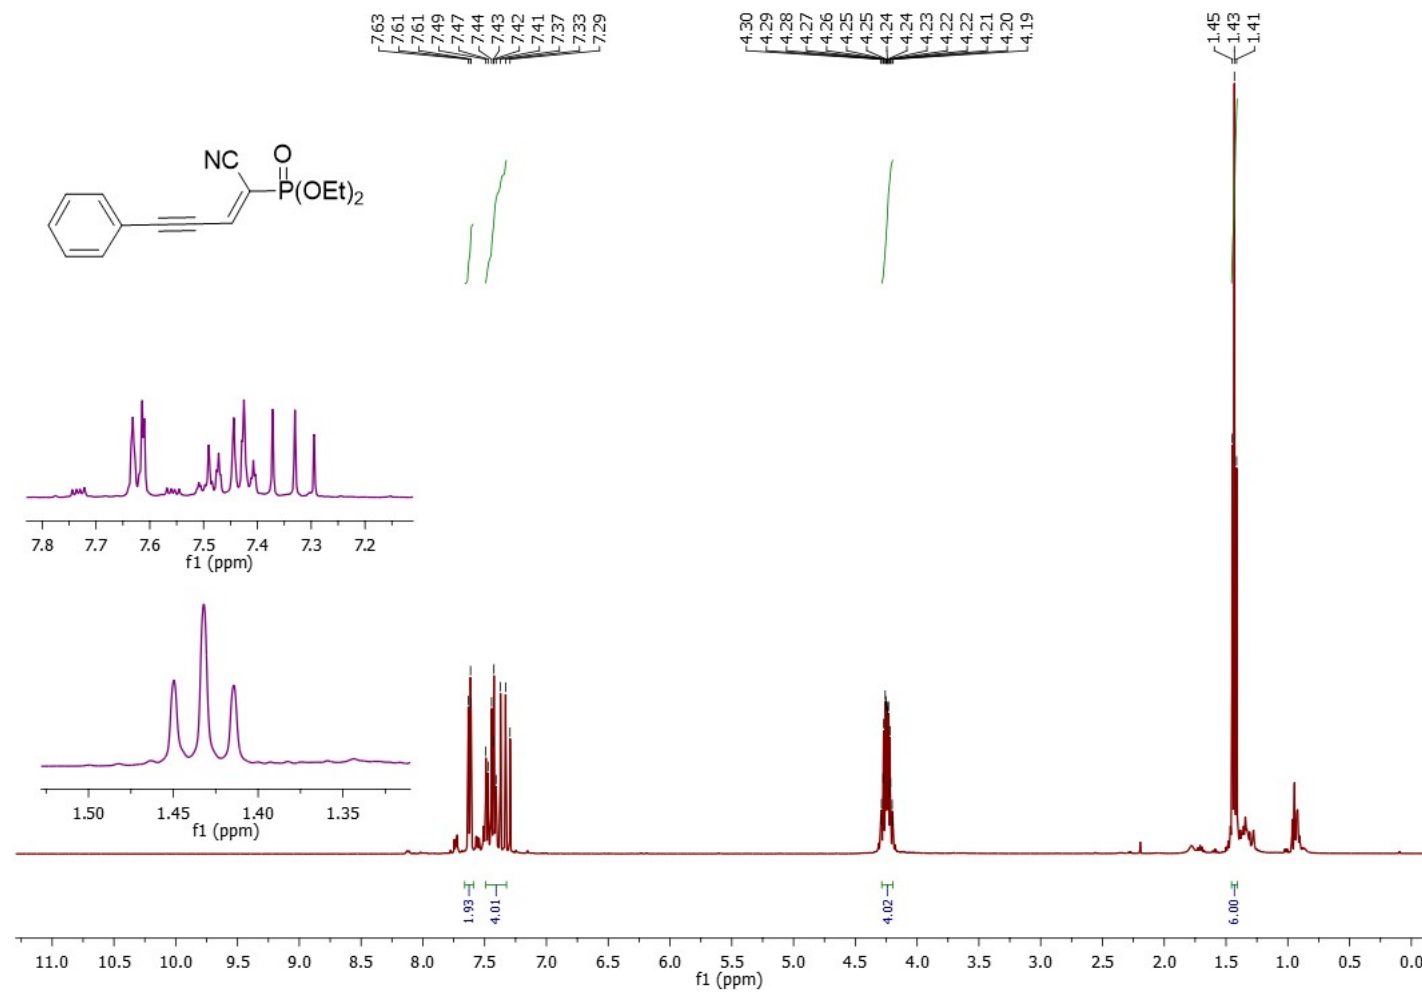

Figure S43: <sup>1</sup>H NMR Spectra of 2o

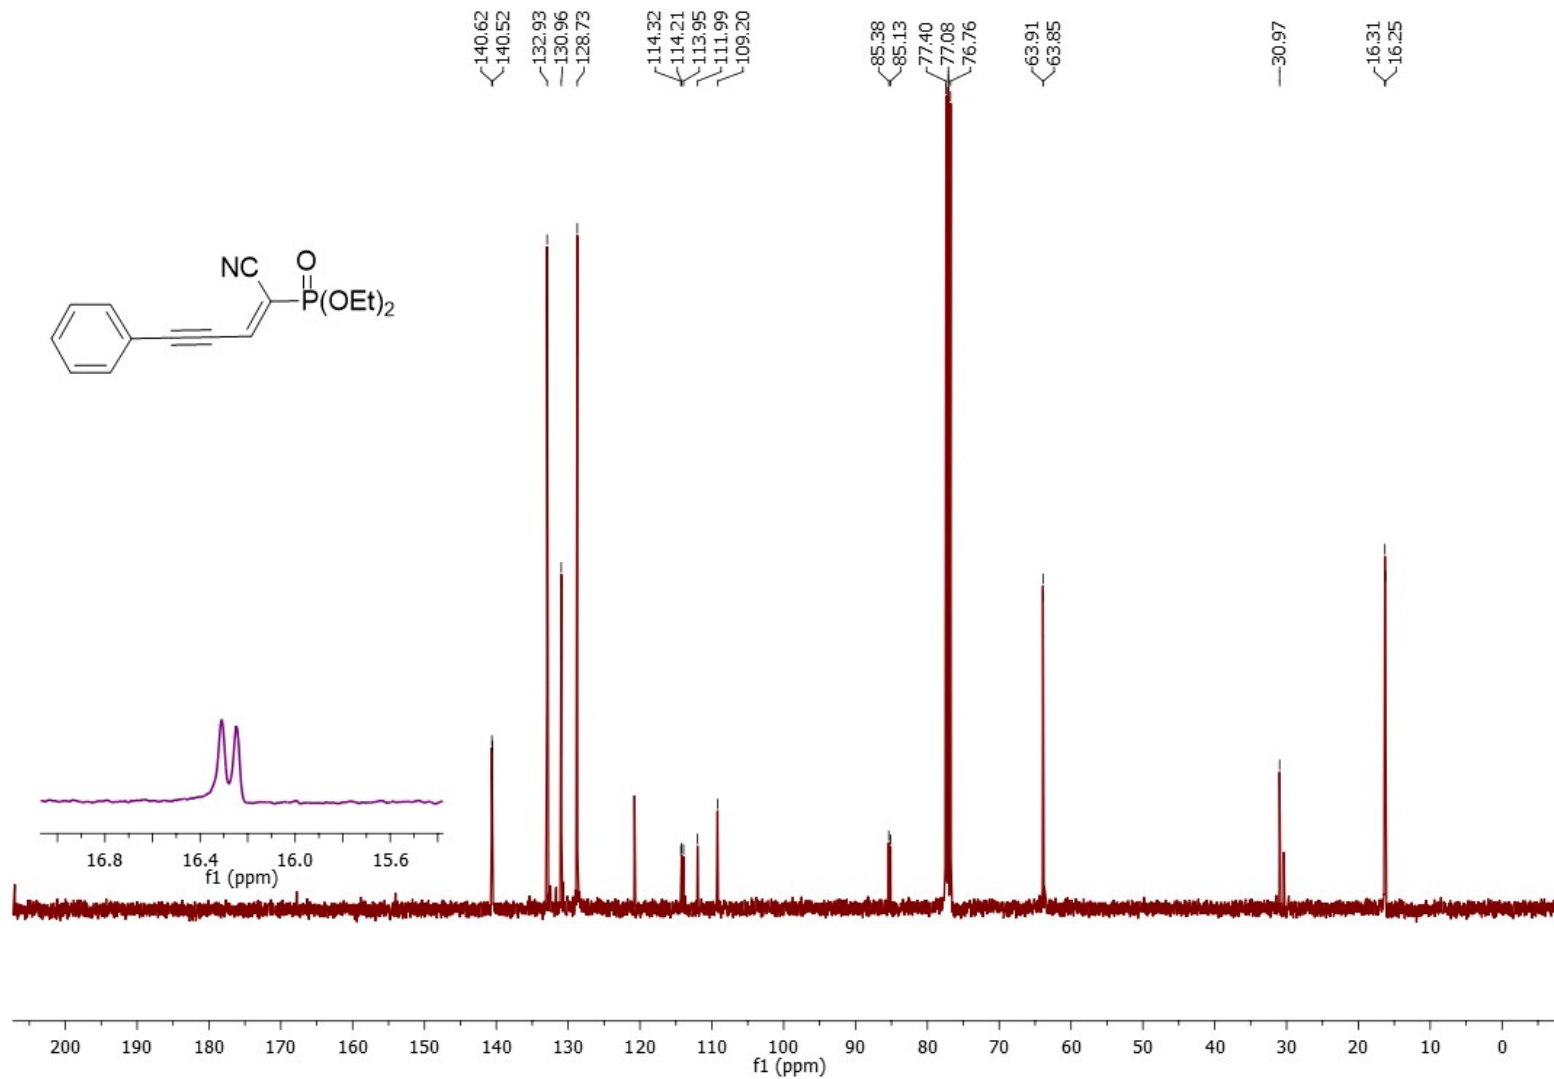

Figure S44: <sup>13</sup>C NMR Spectra of 2o



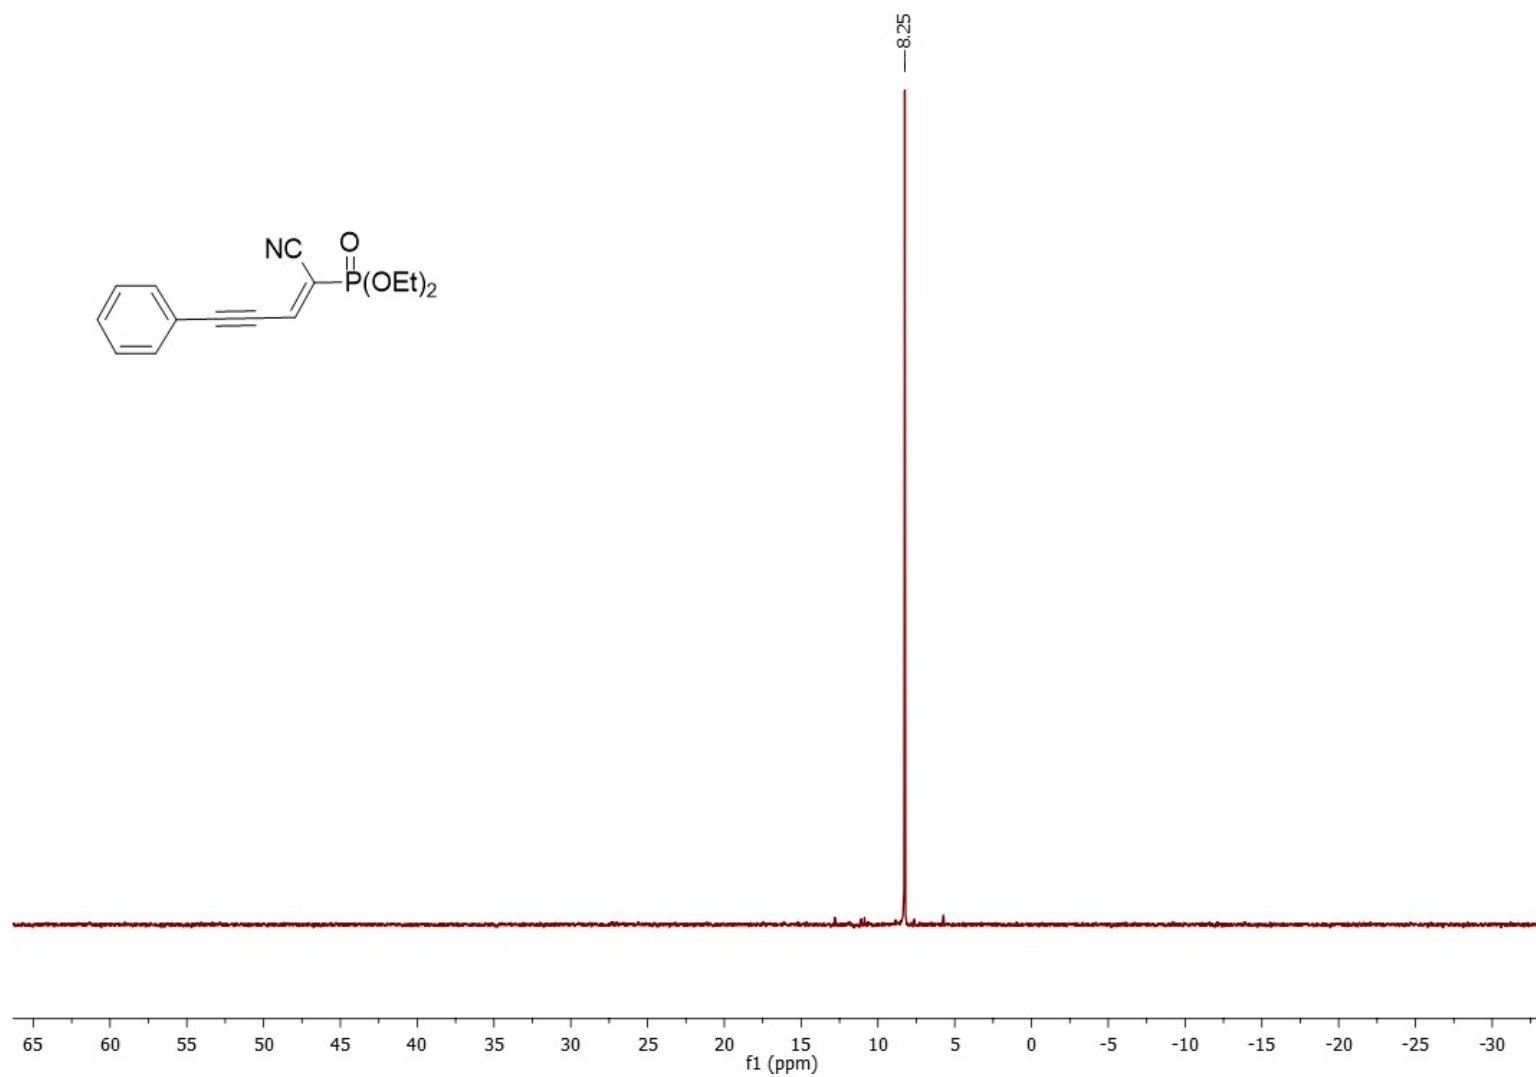

Figure S45:  $^{31}\text{P}$  NMR Spectra of 2o

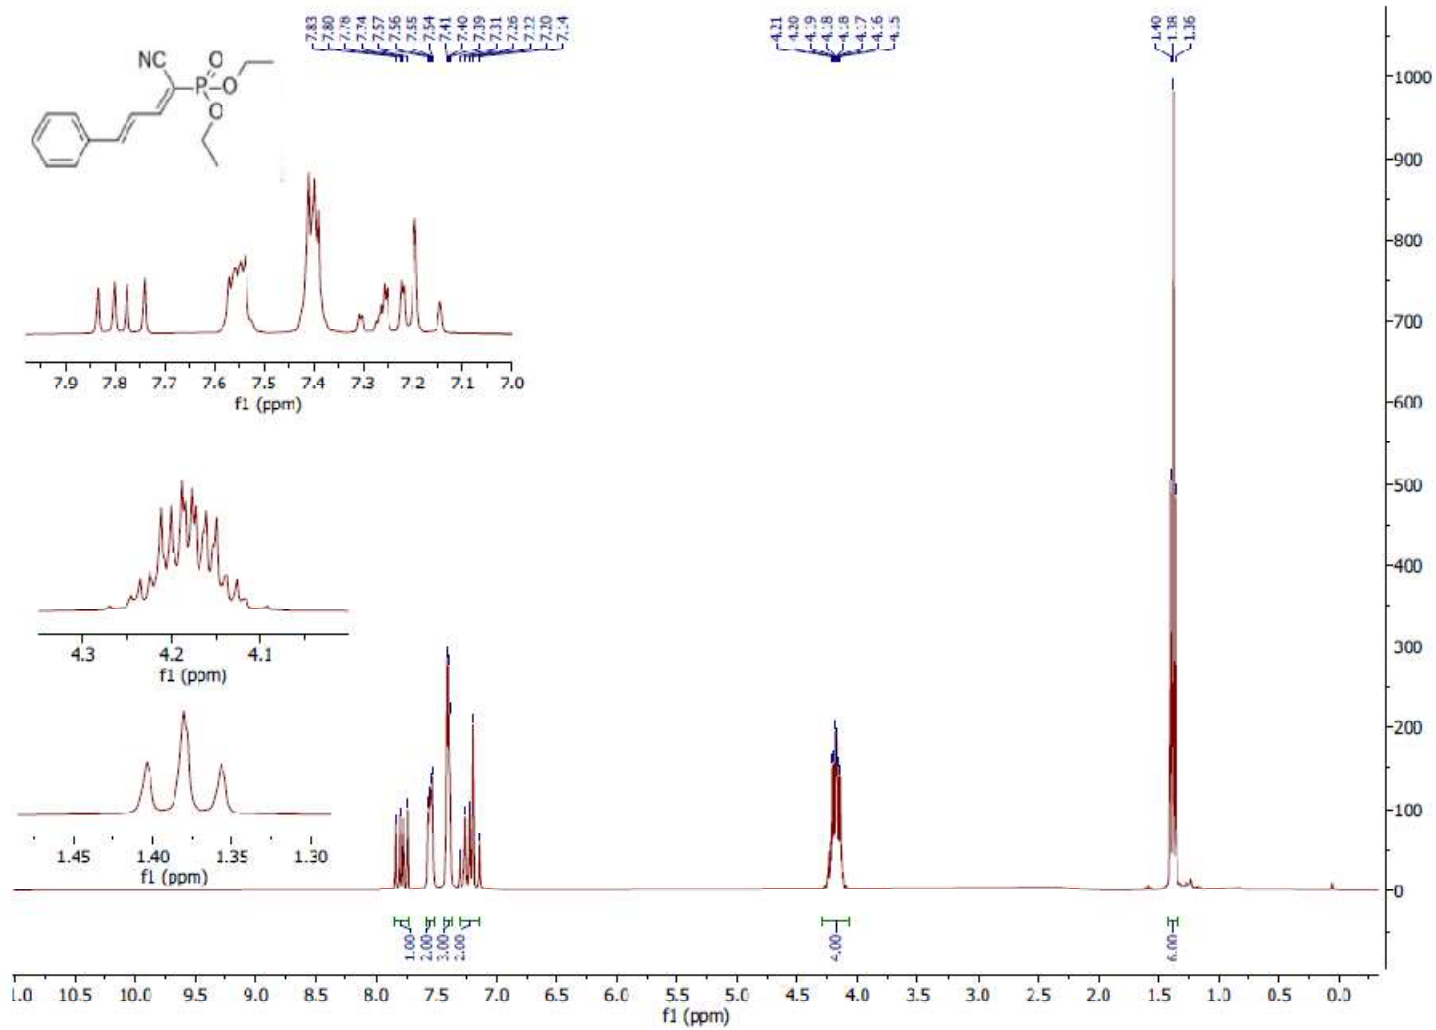

Figure S46: <sup>1</sup>H NMR Spectra of 2p

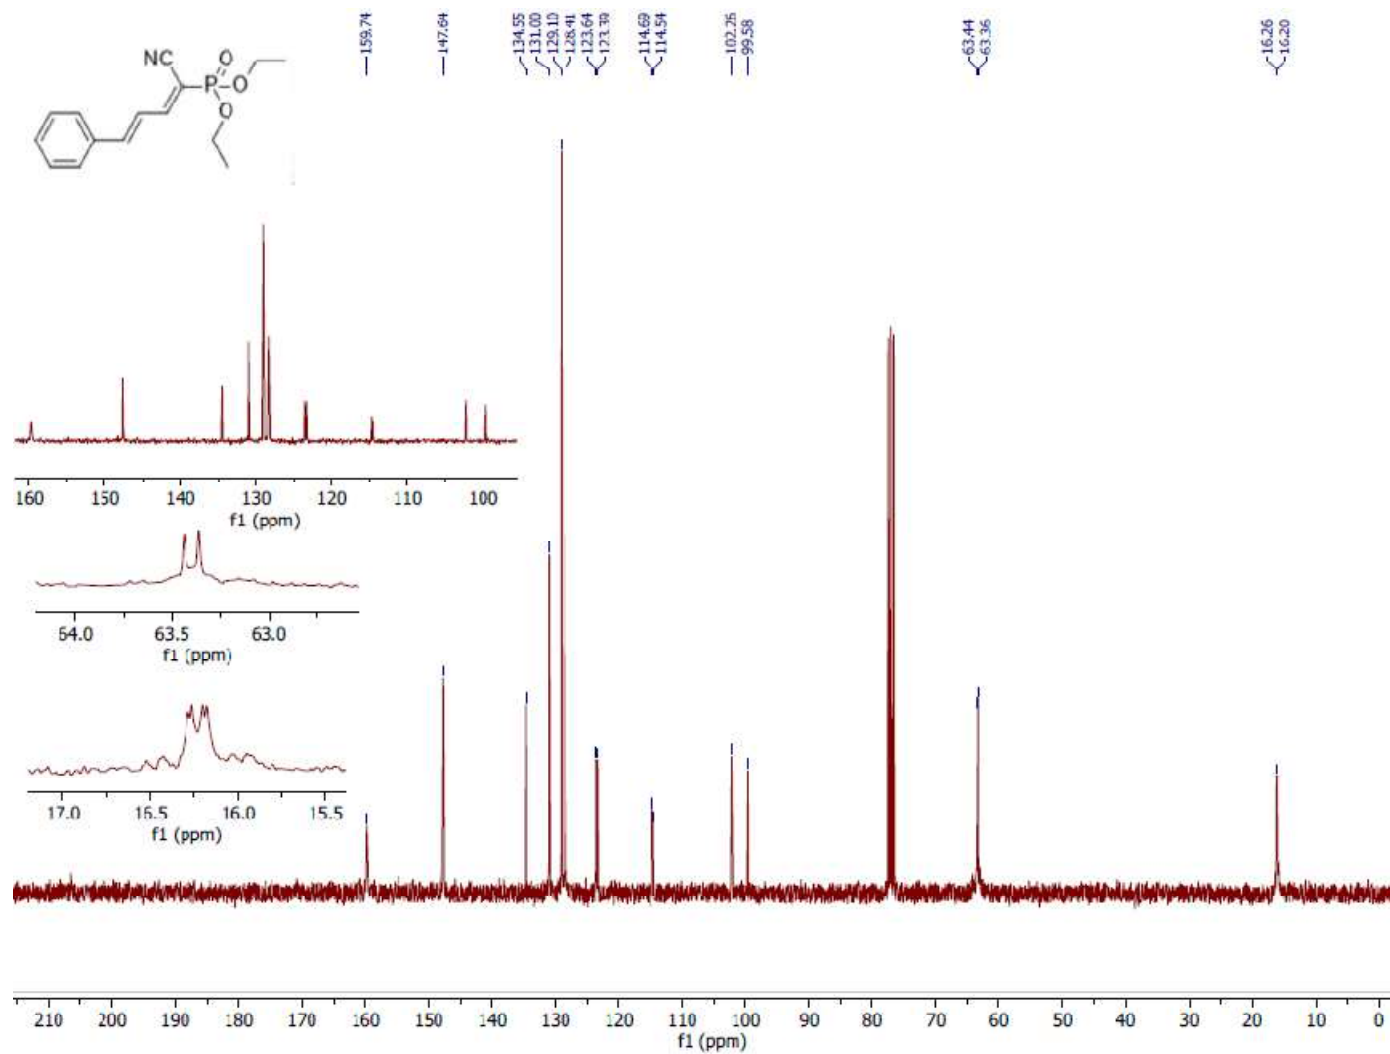

Figure S47: <sup>13</sup>C NMR Spectra of 2p

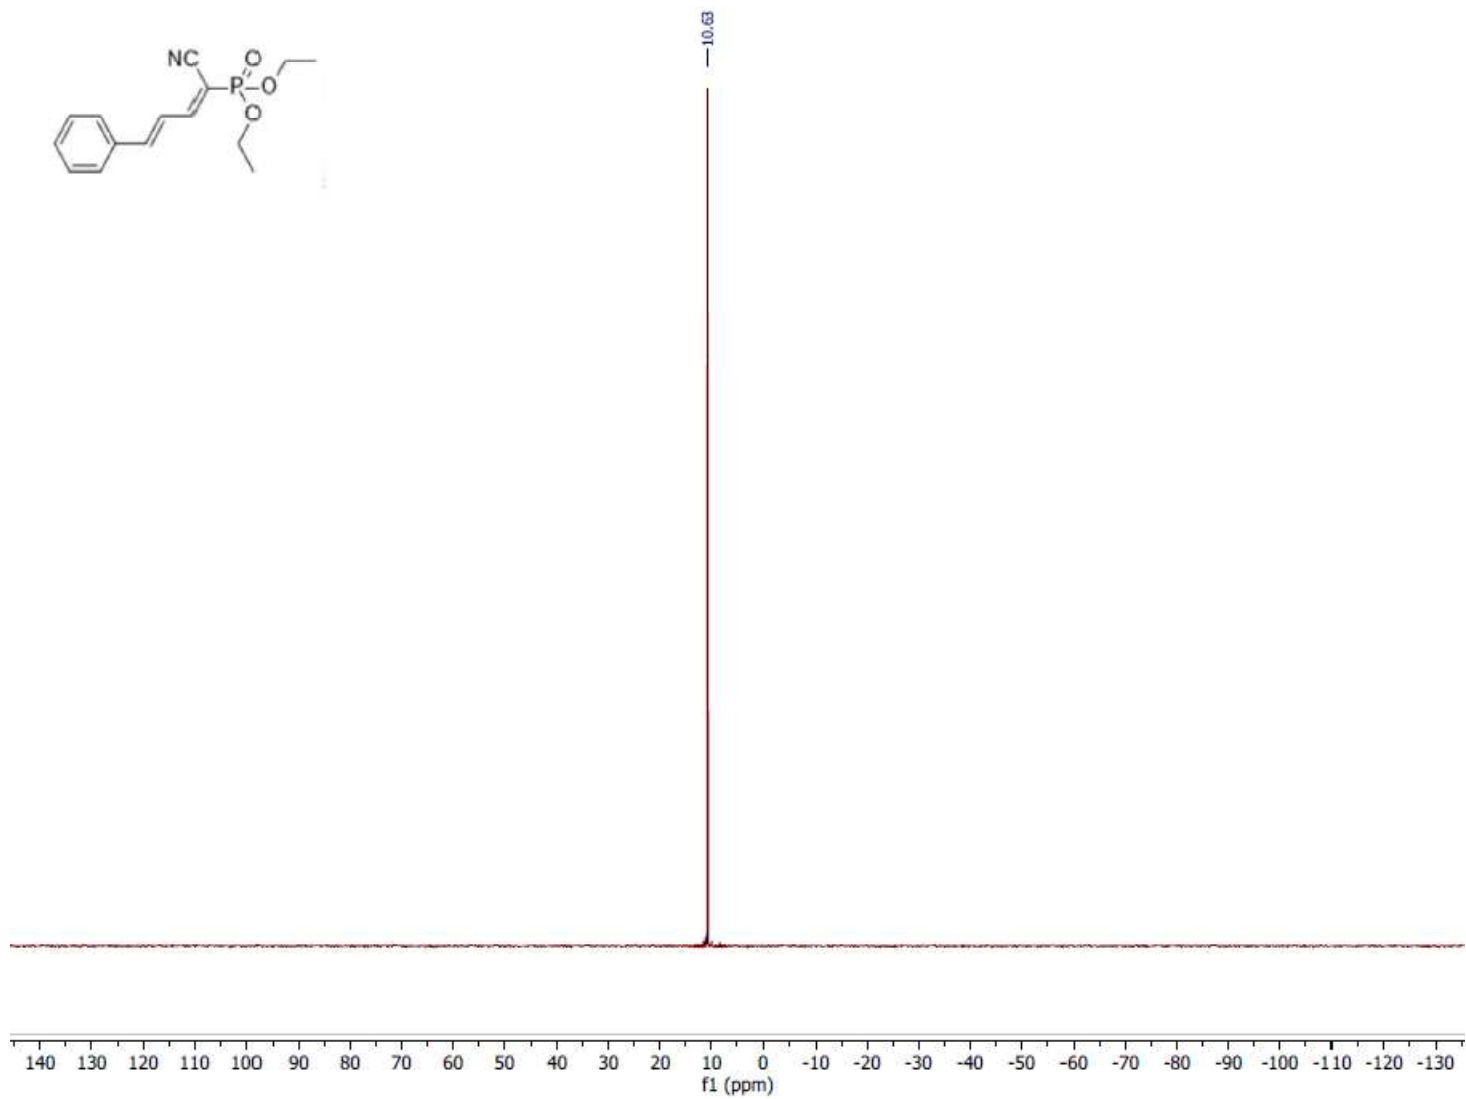

Figure S48:  $^{31}\text{P}$  NMR Spectra of 2p

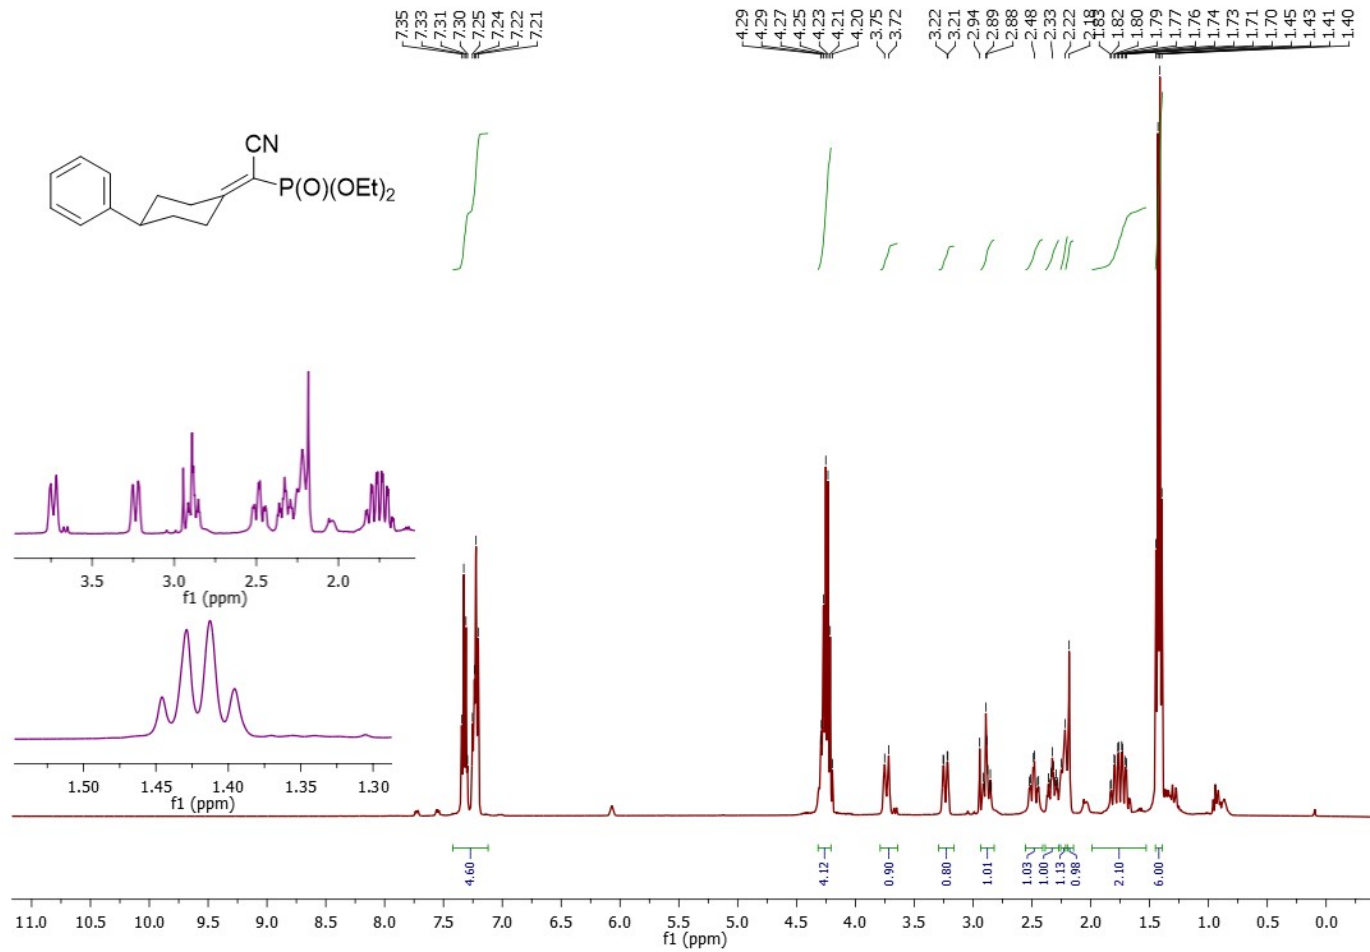

Figure S49: <sup>1</sup>H NMR Spectra of 4a

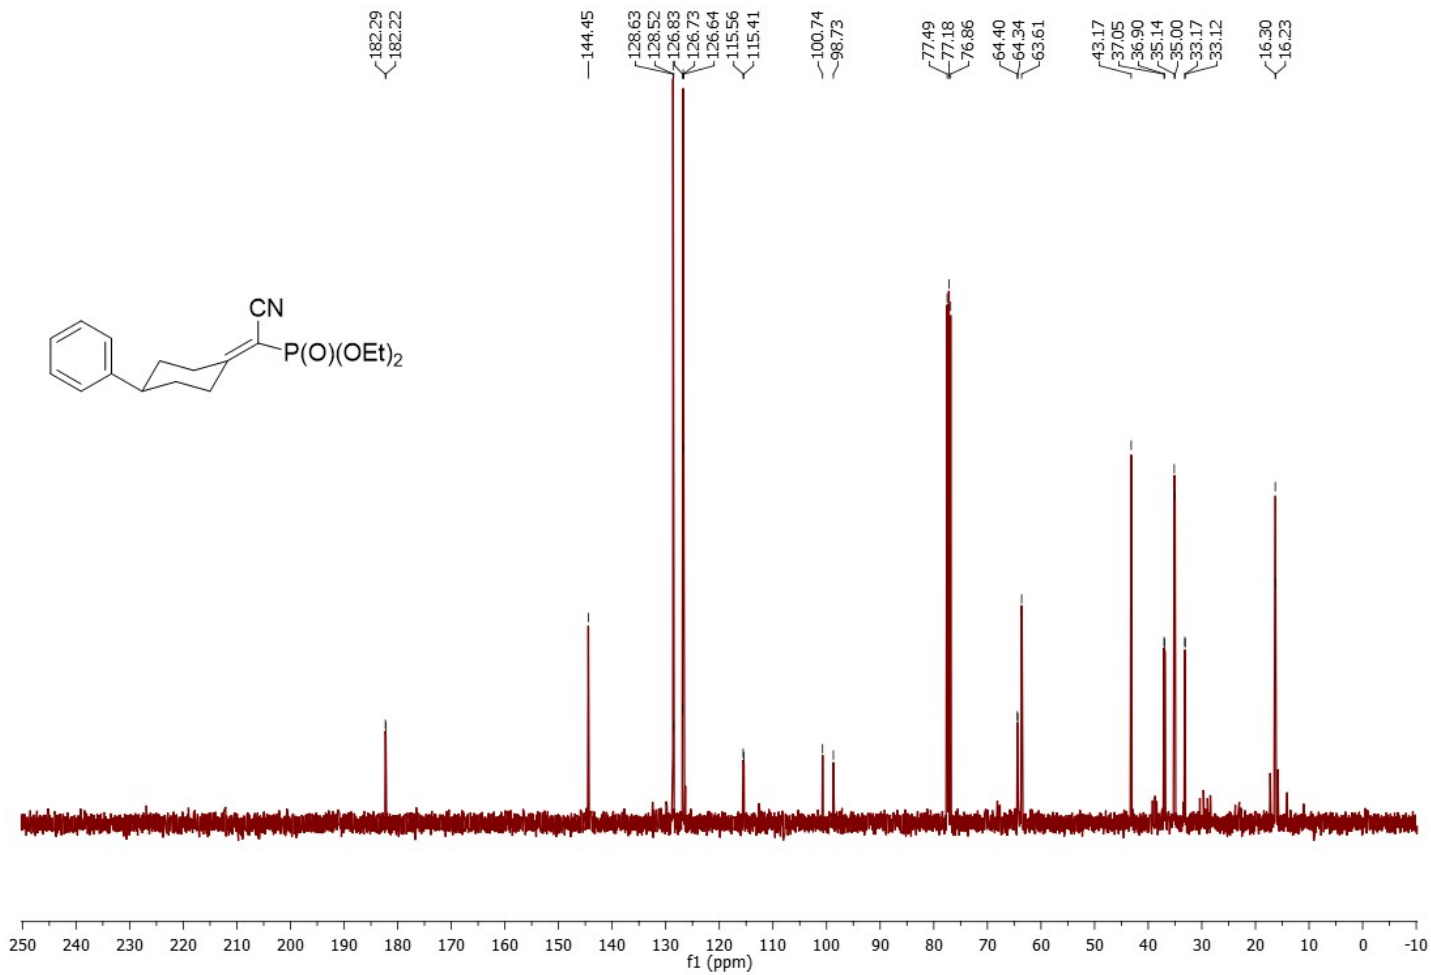

Figure S50:  $^{13}\text{C}$ NMR Spectra of 4a

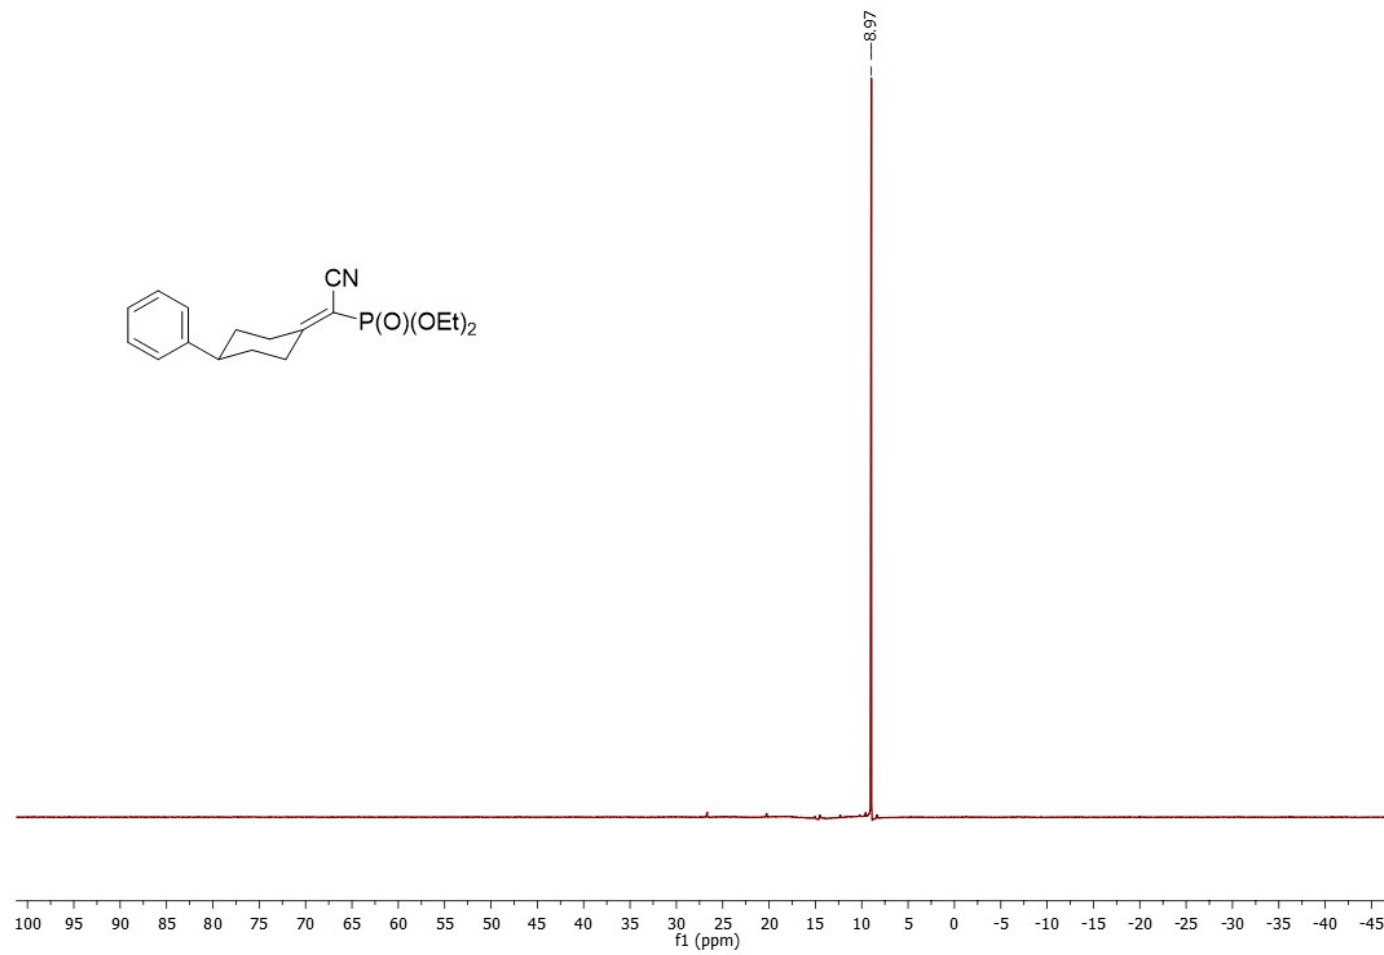

Figure S51:  $^{31}\text{P}$  NMR Spectra of 4a

# Elemental Composition Report

## Single Mass Analysis

Tolerance = 10.0 mDa / DBE: min = -1.5, max = 300.0

Element prediction: Off

Number of isotope peaks used for i-FIT = 3

Monoisotopic Mass, Even Electron Ions

3 formula(e) evaluated with 1 results within limits (up to 50 closest results for each mass)

Elements Used:

C: 0-300 H: 0-3000 N: 1-1 O: 3-3 Na: 1-1 P: 1-1

VNL17

M-18969 128 (1.298) AM2 (Ar,22000.0,0.00,0.00); ABS; Cm (120:149)

1: TOF MS ES+  
8.58e+007

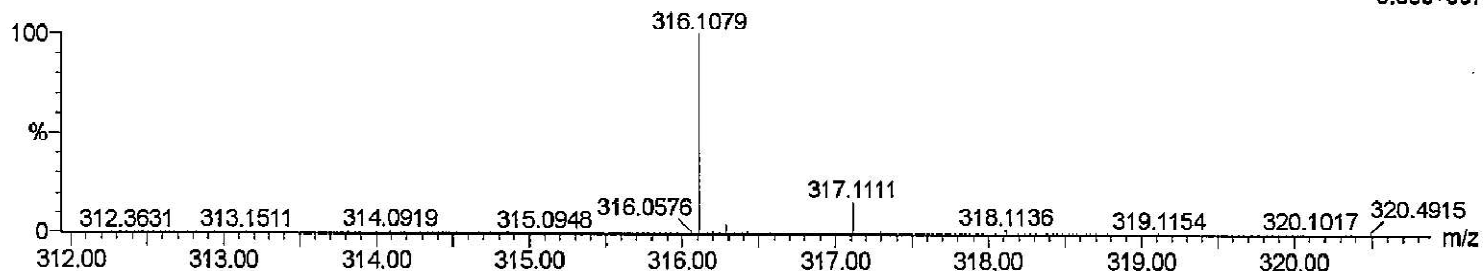

Minimum: -1.5  
Maximum: 10.0 5.0 300.0

| Mass     | Calc. Mass | mDa | PPM | DBE | i-FIT | Norm | Conf (%) | Formula           |
|----------|------------|-----|-----|-----|-------|------|----------|-------------------|
| 316.1079 | 316.1078   | 0.1 | 0.3 | 6.5 | 964.5 | n/a  | n/a      | C15 H20 N O3 Na P |

Figure S52: HR Mass data for the unstable compound 2q



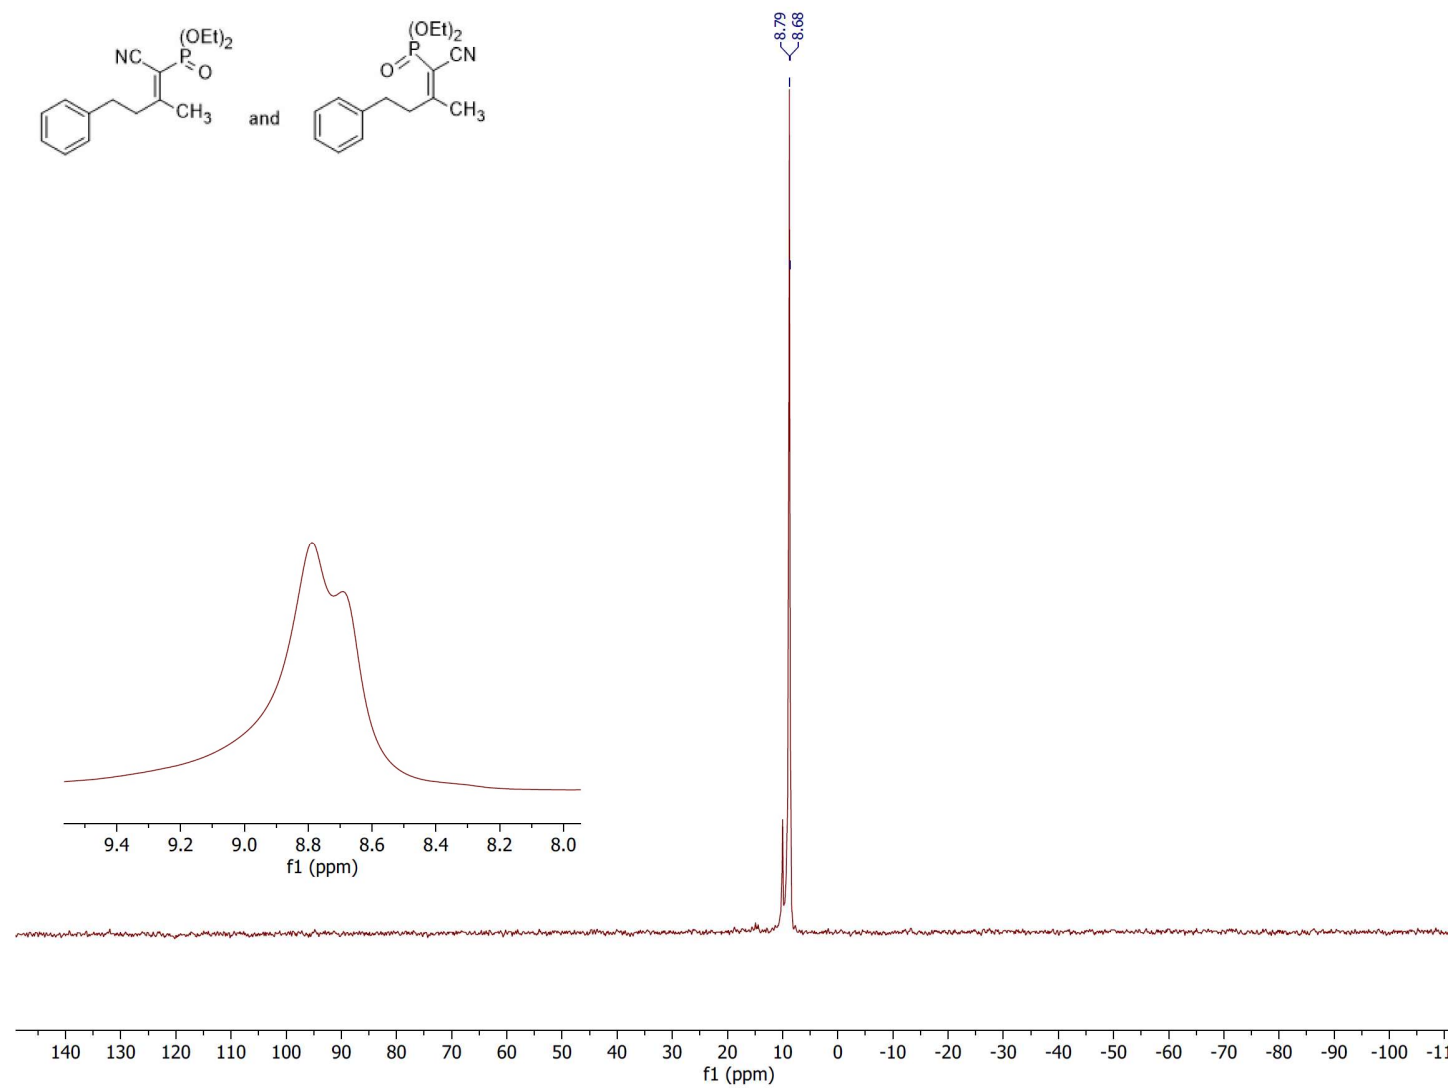

Figure S53:  $^{31}\text{P}$  NMR Spectra of 4b (a mixture of E and Z ~50:50)

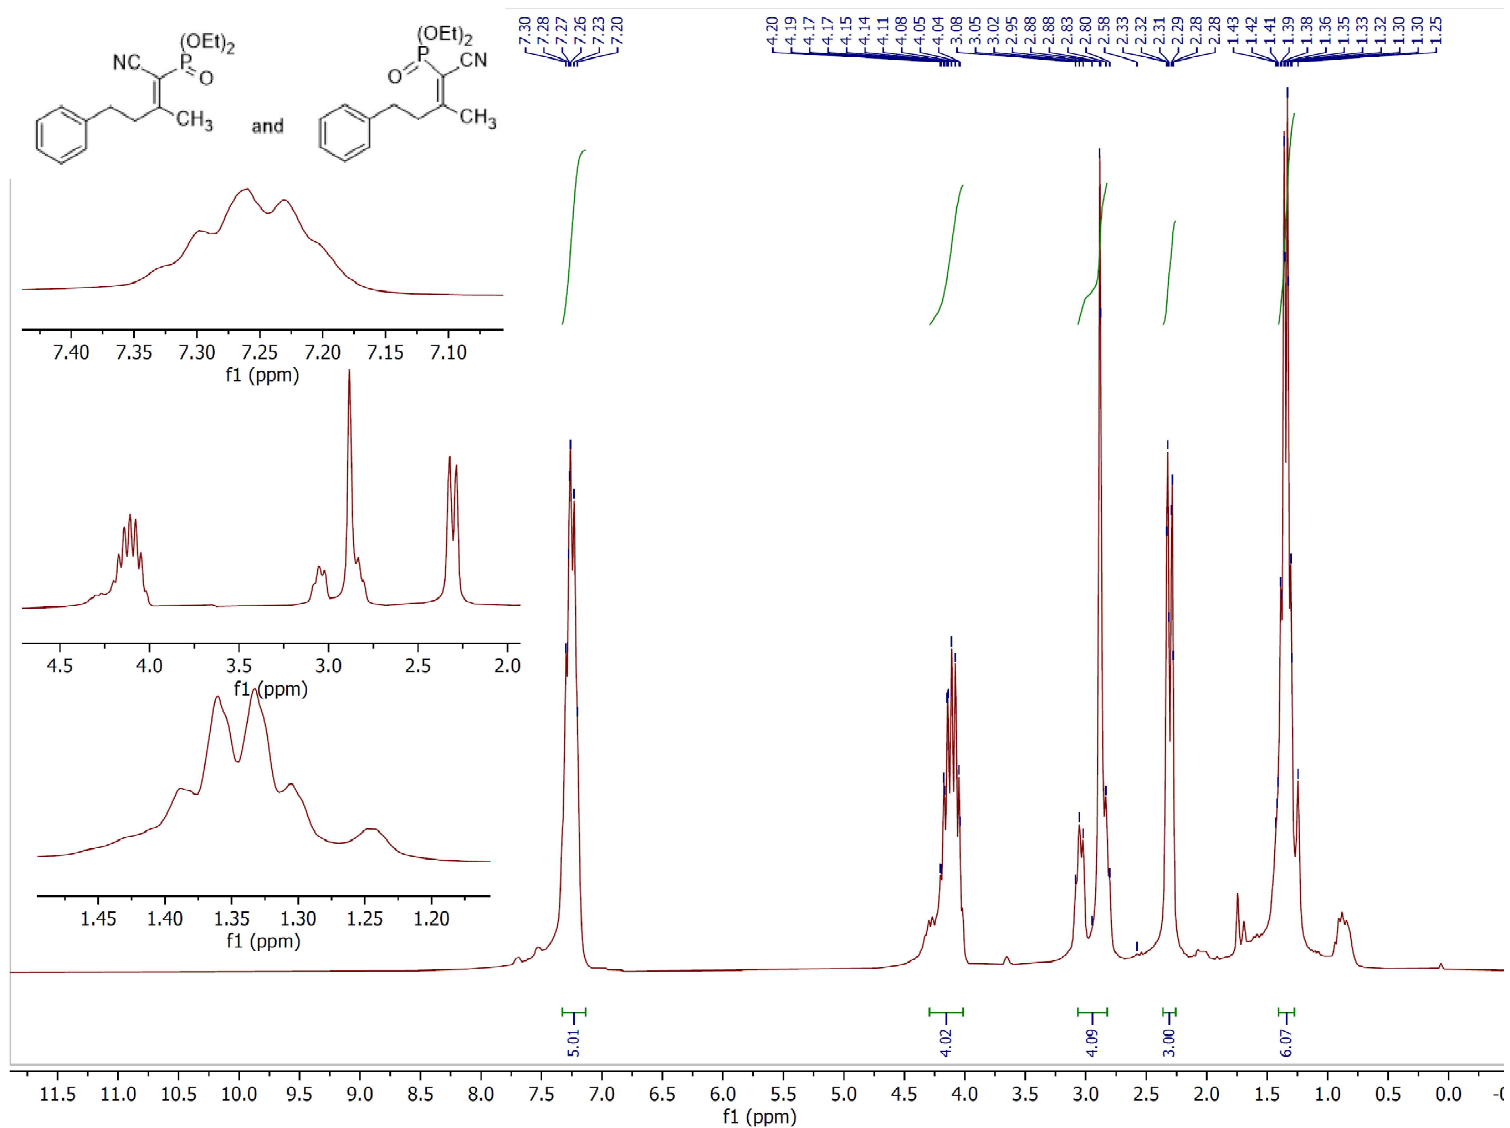

Figure S54: <sup>1</sup>H NMR Spectra of 4b (a mixture of E and Z ~50:50)

## 1. DFT calculations

All calculations were carried out by using *Gaussian 09* program, revision D.01.<sup>1</sup> Molecular geometries were optimized and characterized by frequency analysis using a hybrid density functional (M06).<sup>2</sup> Ahlrichs' SVP all-electron basis set<sup>3</sup> for Zn atom and 6-31+G(d) basis set for other atoms were used for all calculations. Single imaginary frequency was obtained in all transition states, which were supported by the intrinsic reaction coordinate (IRC) calculations using 'lqa' keyword. Each geometry of intermediates was obtained by geometry optimization of the IRC geometries. The geometries are visualized by using the *CYLview* program.<sup>4</sup> For bonding analysis, Bader's Quantum Theory of Atoms in Molecules (QTAIM) was applied by using *AIMAll* program.<sup>5</sup>

### 1. 1 For starting molecules

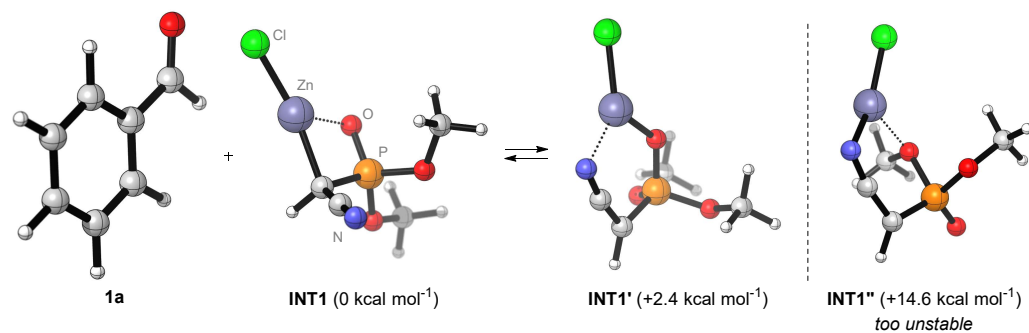

**Table S1.** Coordinates and energies for optimized geometry of **1a**

| Center | Atomic | Atomic | Coordinates (Angstroms) |           |           |
|--------|--------|--------|-------------------------|-----------|-----------|
| Number | Number | Type   | X                       | Y         | Z         |
| 1      | 6      | 0      | -1.980841               | 0.464852  | 0.000108  |
| 2      | 8      | 0      | -2.842811               | -0.392077 | -0.000232 |
| 3      | 1      | 0      | -2.258824               | 1.544332  | 0.000427  |
| 4      | 6      | 0      | -0.533033               | 0.205338  | 0.000113  |
| 5      | 6      | 0      | 0.352246                | 1.286655  | 0.000036  |
| 6      | 6      | 0      | -0.040812               | -1.105006 | 0.000113  |
| 7      | 6      | 0      | 1.725204                | 1.063734  | -0.000087 |
| 8      | 1      | 0      | -0.043731               | 2.303191  | 0.000103  |
| 9      | 6      | 0      | 1.328875                | -1.326405 | 0.000042  |
| 10     | 1      | 0      | -0.746995               | -1.933879 | 0.000168  |
| 11     | 6      | 0      | 2.210543                | -0.242404 | -0.000086 |
| 12     | 1      | 0      | 2.416042                | 1.904669  | -0.000191 |
| 13     | 1      | 0      | 1.717950                | -2.342933 | 0.000091  |
| 14     | 1      | 0      | 3.284951                | -0.419354 | -0.000179 |

---

E(RM06) = -345.342780337

Zero-point correction= 0.109661 (Hartree/Particle)

Sum of electronic and thermal Energies= -345.225154

Sum of electronic and thermal Enthalpies= -345.224084

Sum of electronic and thermal Free Energies= -345.268827

**Table S2.** Coordinates and energies for optimized geometry of **INT1**

| Center | Atomic | Atomic | Coordinates (Angstroms) |           |           |
|--------|--------|--------|-------------------------|-----------|-----------|
| Number | Number | Type   | X                       | Y         | Z         |
| 1      | 30     | 0      | 1.454010                | -0.147284 | -0.268157 |
| 2      | 8      | 0      | -0.291835               | -1.409112 | 0.353628  |
| 3      | 15     | 0      | -1.212120               | -0.286640 | -0.077875 |
| 4      | 6      | 0      | -0.173625               | 0.831436  | -1.010345 |
| 5      | 17     | 0      | 3.466995                | -0.675578 | 0.242792  |
| 6      | 8      | 0      | -1.910249               | 0.463968  | 1.142894  |
| 7      | 6      | 0      | -1.164725               | 0.751839  | 2.334892  |
| 8      | 1      | 0      | -0.702504               | -0.161087 | 2.725232  |
| 9      | 1      | 0      | -0.400436               | 1.513634  | 2.134542  |
| 10     | 1      | 0      | -1.882590               | 1.146514  | 3.056223  |

|    |   |   |           |           |           |
|----|---|---|-----------|-----------|-----------|
| 11 | 8 | 0 | -2.439039 | -0.708938 | -0.986580 |
| 12 | 6 | 0 | -3.360007 | -1.708171 | -0.514958 |
| 13 | 1 | 0 | -2.829722 | -2.645225 | -0.311693 |
| 14 | 1 | 0 | -3.868261 | -1.351874 | 0.387413  |
| 15 | 1 | 0 | -4.085374 | -1.855491 | -1.316639 |
| 16 | 6 | 0 | -0.333050 | 2.229594  | -0.771995 |
| 17 | 7 | 0 | -0.440467 | 3.368322  | -0.545156 |
| 18 | 1 | 0 | -0.207834 | 0.582667  | -2.078721 |

---

E(RM06) = -3017.53999763

Zero-point correction= 0.118728 (Hartree/Particle)

Sum of electronic and thermal Energies= -3017.403732

Sum of electronic and thermal Enthalpies= -3017.402661

Sum of electronic and thermal Free Energies= -3017.473486

**Table S3.** Coordinates and energies for optimized geometry of **INT1'**

| Center | Atomic | Atomic | Coordinates (Angstroms) |   |   |
|--------|--------|--------|-------------------------|---|---|
| Number | Number | Type   | X                       | Y | Z |

---

|    |    |   |           |           |           |
|----|----|---|-----------|-----------|-----------|
| 1  | 30 | 0 | -1.642173 | -0.115256 | -0.017101 |
| 2  | 8  | 0 | 0.195352  | 0.532764  | 0.326387  |
| 3  | 15 | 0 | 1.512208  | -0.059897 | -0.182983 |
| 4  | 6  | 0 | 1.256103  | -1.586099 | -0.946094 |
| 5  | 17 | 0 | -3.431010 | 1.014434  | 0.391698  |
| 6  | 8  | 0 | 2.575471  | -0.116346 | 1.016679  |
| 7  | 6  | 0 | 2.226448  | -0.842473 | 2.197776  |
| 8  | 1  | 0 | 1.391231  | -0.352452 | 2.711355  |
| 9  | 1  | 0 | 1.958985  | -1.877206 | 1.945789  |
| 10 | 1  | 0 | 3.110582  | -0.838350 | 2.838515  |
| 11 | 8  | 0 | 2.269749  | 0.912648  | -1.188129 |
| 12 | 6  | 0 | 2.687380  | 2.211158  | -0.740736 |
| 13 | 1  | 0 | 1.862796  | 2.724109  | -0.231740 |
| 14 | 1  | 0 | 3.545917  | 2.118008  | -0.067936 |
| 15 | 1  | 0 | 2.970514  | 2.767858  | -1.636124 |
| 16 | 6  | 0 | -0.077711 | -1.872558 | -0.968602 |
| 17 | 7  | 0 | -1.262574 | -1.909272 | -0.858449 |
| 18 | 1  | 0 | 2.029335  | -2.159000 | -1.445369 |

---


$$E(RM06) = -3017.53811404$$





## 1.2 Reaction pathways for the Knoevenagel reaction

### 1.2.1 For (Z)-product

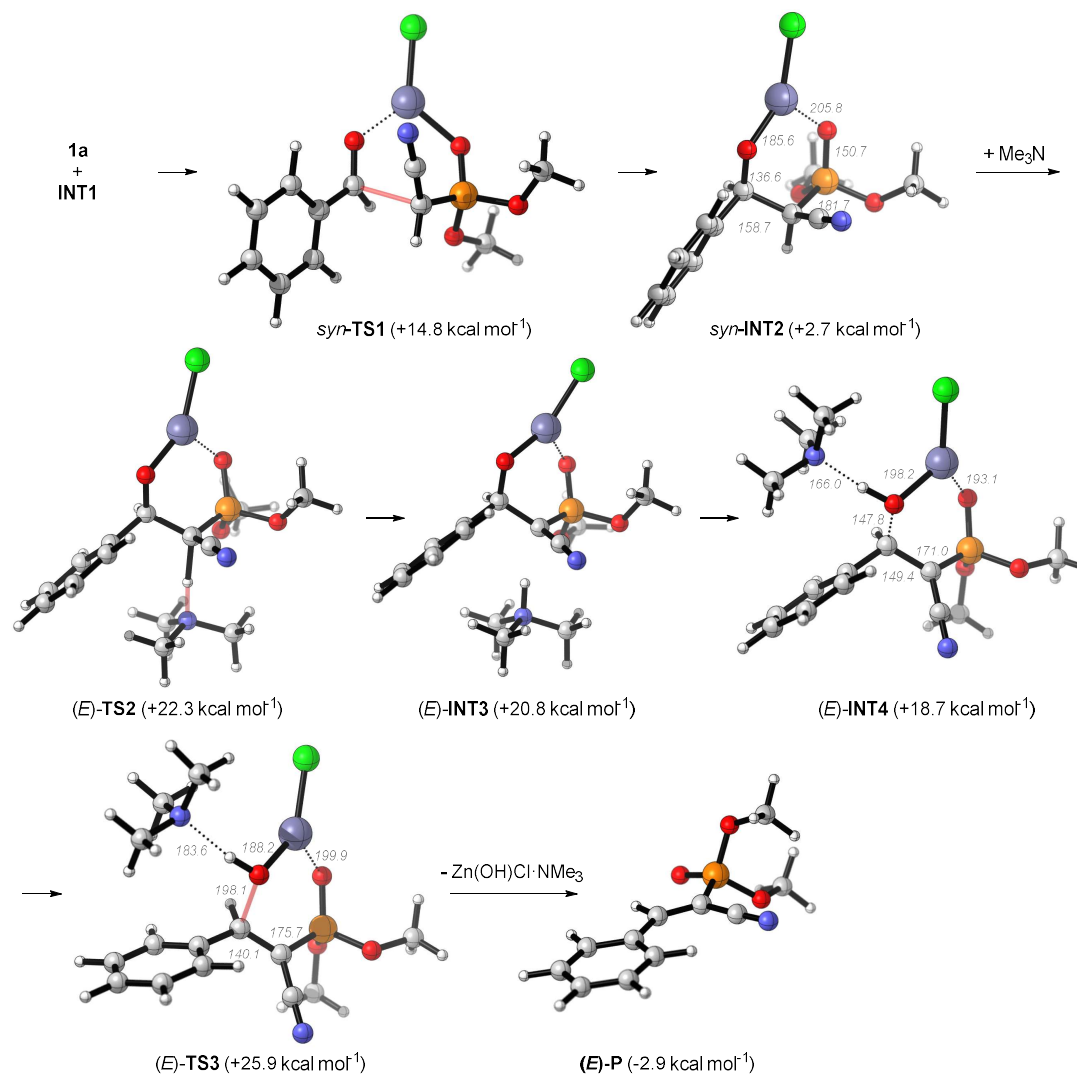

**Table S4.** Coordinates and energies for optimized geometry of *syn*-TS1

| Center<br>Number | Atomic<br>Number | Atomic<br>Type | Coordinates (Angstroms) |           |           |
|------------------|------------------|----------------|-------------------------|-----------|-----------|
|                  |                  |                | X                       | Y         | Z         |
| 1                | 30               | 0              | 1.387176                | 1.520584  | -0.465839 |
| 2                | 8                | 0              | 1.960187                | -0.332281 | -0.245184 |
| 3                | 15               | 0              | 1.132855                | -1.567108 | 0.107821  |
| 4                | 6                | 0              | -0.375992               | -1.142127 | 0.843159  |
| 5                | 6                | 0              | -1.195731               | 0.297443  | -0.850570 |
| 6                | 8                | 0              | -0.540128               | 1.366692  | -0.689316 |
| 7                | 17               | 0              | 2.639407                | 3.265622  | -0.272904 |
| 8                | 8                | 0              | 2.084418                | -2.587875 | 0.897014  |
| 9                | 6                | 0              | 2.805047                | -2.107331 | 2.040301  |
| 10               | 1                | 0              | 3.516514                | -1.330842 | 1.739416  |
| 11               | 1                | 0              | 2.112405                | -1.710694 | 2.793773  |
| 12               | 1                | 0              | 3.338435                | -2.966109 | 2.452029  |
| 13               | 8                | 0              | 0.710623                | -2.443757 | -1.151473 |
| 14               | 6                | 0              | 1.705308                | -3.133336 | -1.921675 |
| 15               | 1                | 0              | 2.539665                | -2.464861 | -2.164846 |
| 16               | 1                | 0              | 2.070102                | -4.003149 | -1.366754 |
| 17               | 1                | 0              | 1.211630                | -3.454914 | -2.840863 |
| 18               | 6                | 0              | -0.318455               | -0.148049 | 1.831897  |
| 19               | 7                | 0              | -0.247574               | 0.762193  | 2.567551  |

|    |   |   |           |           |           |
|----|---|---|-----------|-----------|-----------|
| 20 | 1 | 0 | -1.114890 | -1.936859 | 0.952106  |
| 21 | 1 | 0 | -0.848722 | -0.459309 | -1.570973 |
| 22 | 6 | 0 | -2.601402 | 0.214584  | -0.454042 |
| 23 | 6 | 0 | -3.362642 | -0.886983 | -0.863469 |
| 24 | 6 | 0 | -3.185414 | 1.222439  | 0.320707  |
| 25 | 6 | 0 | -4.700674 | -0.980058 | -0.505119 |
| 26 | 1 | 0 | -2.890042 | -1.673297 | -1.455698 |
| 27 | 6 | 0 | -4.524797 | 1.124137  | 0.680262  |
| 28 | 1 | 0 | -2.579600 | 2.071465  | 0.632583  |
| 29 | 6 | 0 | -5.281144 | 0.026147  | 0.269973  |
| 30 | 1 | 0 | -5.293662 | -1.836125 | -0.822291 |
| 31 | 1 | 0 | -4.982546 | 1.905519  | 1.284320  |
| 32 | 1 | 0 | -6.329706 | -0.046088 | 0.554715  |

---

E(RM06) = -3362.88489816

Zero-point correction = 0.229736 (Hartree/Particle)

Sum of electronic and thermal Energies = -3362.628926

Sum of electronic and thermal Enthalpies = -3362.627855

Sum of electronic and thermal Free Energies = -3362.718695

**Table S5.** Coordinates and energies for optimized geometry of *syn*-INT2

| Center | Atomic | Atomic | Coordinates (Angstroms) |   |   |
|--------|--------|--------|-------------------------|---|---|
| Number | Number | Type   | X                       | Y | Z |

---

|    |    |   |           |           |           |
|----|----|---|-----------|-----------|-----------|
| 1  | 30 | 0 | 1.362789  | 1.646247  | -0.189059 |
| 2  | 8  | 0 | 2.088685  | -0.277180 | -0.095538 |
| 3  | 15 | 0 | 1.170560  | -1.472641 | -0.091454 |
| 4  | 6  | 0 | -0.551653 | -1.062483 | 0.317868  |
| 5  | 6  | 0 | -1.067563 | 0.170460  | -0.537753 |
| 6  | 8  | 0 | -0.468156 | 1.340877  | -0.166453 |
| 7  | 17 | 0 | 2.926592  | 3.127689  | -0.206841 |
| 8  | 8  | 0 | 1.686064  | -2.619167 | 0.875890  |
| 9  | 6  | 0 | 2.464341  | -2.327433 | 2.055296  |
| 10 | 1  | 0 | 3.328498  | -1.710500 | 1.792914  |
| 11 | 1  | 0 | 1.843344  | -1.819132 | 2.800565  |
| 12 | 1  | 0 | 2.793166  | -3.293948 | 2.440180  |
| 13 | 6  | 0 | 2.143023  | -2.640282 | -2.217967 |
| 14 | 1  | 0 | 2.833243  | -1.805766 | -2.380922 |
| 15 | 1  | 0 | 2.640045  | -3.447479 | -1.669344 |
| 16 | 1  | 0 | 1.773005  | -3.012014 | -3.174517 |
| 17 | 6  | 0 | -0.648198 | -0.786428 | 1.741760  |
| 18 | 7  | 0 | -0.684187 | -0.551301 | 2.879243  |
| 19 | 1  | 0 | -1.147105 | -1.958100 | 0.080614  |
| 20 | 6  | 0 | -2.574287 | 0.229778  | -0.384410 |
| 21 | 6  | 0 | -3.162665 | 1.122456  | 0.510232  |
| 22 | 6  | 0 | -4.547050 | 1.141275  | 0.670063  |

|    |   |   |           |           |           |
|----|---|---|-----------|-----------|-----------|
| 23 | 6 | 0 | -5.351435 | 0.273631  | -0.065917 |
| 24 | 6 | 0 | -4.767067 | -0.615656 | -0.967080 |
| 25 | 6 | 0 | -3.384115 | -0.634937 | -1.123842 |
| 26 | 1 | 0 | -2.524302 | 1.801592  | 1.072760  |
| 27 | 1 | 0 | -4.999099 | 1.840476  | 1.372386  |
| 28 | 1 | 0 | -6.433293 | 0.293765  | 0.057773  |
| 29 | 1 | 0 | -5.390538 | -1.288269 | -1.554722 |
| 30 | 1 | 0 | -2.927376 | -1.323908 | -1.838656 |
| 31 | 8 | 0 | 0.985280  | -2.193334 | -1.488226 |
| 32 | 1 | 0 | -0.849387 | -0.117975 | -1.588724 |

---

$E(\text{RM06}) = -3362.90798600$

Zero-point correction = 0.232577 (Hartree/Particle)

Sum of electronic and thermal Energies = -3362.649373

Sum of electronic and thermal Enthalpies = -3362.648302

Sum of electronic and thermal Free Energies = -3362.737935

**Table S6.** Coordinates and energies for optimized geometry of (*E*)-**TS2**

| Center | Atomic | Atomic | Coordinates (Angstroms) |           |           |
|--------|--------|--------|-------------------------|-----------|-----------|
| Number | Number | Type   | X                       | Y         | Z         |
| 1      | 30     | 0      | -2.423299               | -1.334336 | -0.193251 |
| 2      | 8      | 0      | -2.280636               | 0.660110  | -0.558920 |
| 3      | 15     | 0      | -1.012477               | 1.392852  | -0.150783 |

|    |    |   |           |           |           |
|----|----|---|-----------|-----------|-----------|
| 4  | 6  | 0 | 0.333183  | 0.380952  | 0.365283  |
| 5  | 6  | 0 | 0.339061  | -0.974107 | -0.413968 |
| 6  | 8  | 0 | -0.648208 | -1.852386 | -0.003755 |
| 7  | 17 | 0 | -4.483293 | -1.998697 | -0.164164 |
| 8  | 8  | 0 | -1.325053 | 2.525099  | 0.936886  |
| 9  | 6  | 0 | -2.266243 | 2.272977  | 1.993467  |
| 10 | 1  | 0 | -2.431786 | 3.232650  | 2.487302  |
| 11 | 1  | 0 | -3.208992 | 1.896186  | 1.582511  |
| 12 | 1  | 0 | -1.848307 | 1.556000  | 2.710392  |
| 13 | 8  | 0 | -0.428818 | 2.252447  | -1.370787 |
| 14 | 6  | 0 | -1.346228 | 3.024609  | -2.159339 |
| 15 | 1  | 0 | -2.002573 | 2.361584  | -2.732362 |
| 16 | 1  | 0 | -1.945433 | 3.681126  | -1.517157 |
| 17 | 1  | 0 | -0.738748 | 3.628352  | -2.837023 |
| 18 | 6  | 0 | 0.419302  | 0.276672  | 1.781128  |
| 19 | 7  | 0 | 0.565948  | 0.239421  | 2.942428  |
| 20 | 1  | 0 | 1.599000  | 1.163799  | 0.079037  |
| 21 | 7  | 0 | 2.625017  | 1.830830  | -0.003703 |
| 22 | 6  | 0 | 2.312269  | 3.089261  | 0.693090  |
| 23 | 1  | 0 | 1.466127  | 3.575344  | 0.195505  |
| 24 | 1  | 0 | 2.040249  | 2.866136  | 1.730935  |
| 25 | 1  | 0 | 3.184696  | 3.756974  | 0.676891  |

|    |   |   |          |           |           |
|----|---|---|----------|-----------|-----------|
| 26 | 6 | 0 | 2.924151 | 2.057855  | -1.425228 |
| 27 | 1 | 0 | 3.116542 | 1.092994  | -1.906954 |
| 28 | 1 | 0 | 2.059036 | 2.533918  | -1.898174 |
| 29 | 1 | 0 | 3.810177 | 2.700392  | -1.526833 |
| 30 | 6 | 0 | 3.709235 | 1.096725  | 0.672882  |
| 31 | 1 | 0 | 3.410946 | 0.883713  | 1.705137  |
| 32 | 1 | 0 | 3.886881 | 0.151820  | 0.146971  |
| 33 | 1 | 0 | 4.627369 | 1.701471  | 0.670704  |
| 34 | 1 | 0 | 0.215847 | -0.680075 | -1.481667 |
| 35 | 6 | 0 | 1.695811 | -1.639322 | -0.312628 |
| 36 | 6 | 0 | 2.091209 | -2.274157 | 0.869042  |
| 37 | 6 | 0 | 2.564827 | -1.647595 | -1.404715 |
| 38 | 6 | 0 | 3.347714 | -2.864016 | 0.966498  |
| 39 | 1 | 0 | 1.402008 | -2.307263 | 1.711758  |
| 40 | 6 | 0 | 3.822666 | -2.244330 | -1.314116 |
| 41 | 1 | 0 | 2.244462 | -1.194953 | -2.346078 |
| 42 | 6 | 0 | 4.221006 | -2.846105 | -0.122766 |
| 43 | 1 | 0 | 3.646023 | -3.349753 | 1.894827  |
| 44 | 1 | 0 | 4.484736 | -2.250314 | -2.179598 |
| 45 | 1 | 0 | 5.201057 | -3.315371 | -0.046296 |

---

$E(\text{RM06}) = -3537.23957491$

Zero-point correction = 0.351949 (Hartree/Particle)

Sum of electronic and thermal Energies = -3536.854287

Sum of electronic and thermal Enthalpies=-3536.853216

Sum of electronic and thermal Free Energies= -3536.957015

**Table S7.** Coordinates and energies for optimized geometry of (*E*)-INT3

| Center<br>Number | Atomic<br>Number | Atomic<br>Type | Coordinates (Angstroms) |           |           |
|------------------|------------------|----------------|-------------------------|-----------|-----------|
|                  |                  |                | X                       | Y         | Z         |
| 1                | 30               | 0              | -2.455041               | -1.288867 | -0.315862 |
| 2                | 8                | 0              | -2.205010               | 0.669279  | -0.885715 |
| 3                | 15               | 0              | -1.013967               | 1.338964  | -0.210848 |
| 4                | 6                | 0              | 0.221621                | 0.241412  | 0.304760  |
| 5                | 6                | 0              | 0.272008                | -1.056691 | -0.532251 |
| 6                | 8                | 0              | -0.727078               | -1.968822 | -0.214747 |
| 7                | 17               | 0              | -4.552520               | -1.687303 | 0.096069  |
| 8                | 8                | 0              | -1.476673               | 2.299289  | 0.990656  |
| 9                | 6                | 0              | -2.444896               | 1.787920  | 1.919143  |
| 10               | 1                | 0              | -2.586747               | 2.562536  | 2.675482  |
| 11               | 1                | 0              | -3.391837               | 1.585011  | 1.405662  |
| 12               | 1                | 0              | -2.075144               | 0.873288  | 2.402434  |
| 13               | 8                | 0              | -0.338423               | 2.402984  | -1.213856 |
| 14               | 6                | 0              | -1.197436               | 3.288099  | -1.946077 |
| 15               | 1                | 0              | -1.885987               | 2.714346  | -2.575738 |
| 16               | 1                | 0              | -1.764252               | 3.926482  | -1.257674 |



|    |   |   |           |           |           |
|----|---|---|-----------|-----------|-----------|
| 17 | 1 | 0 | -0.548094 | 3.905869  | -2.570843 |
| 18 | 6 | 0 | 0.494997  | 0.188553  | 1.680679  |
| 19 | 7 | 0 | 0.810811  | 0.198942  | 2.813231  |
| 20 | 1 | 0 | 1.848881  | 1.176732  | 0.083413  |
| 21 | 7 | 0 | 2.713504  | 1.798182  | 0.164817  |
| 22 | 6 | 0 | 2.266954  | 3.002830  | 0.909594  |
| 23 | 1 | 0 | 1.466688  | 3.487012  | 0.341210  |
| 24 | 1 | 0 | 1.888916  | 2.688560  | 1.887534  |
| 25 | 1 | 0 | 3.117818  | 3.682359  | 1.029548  |
| 26 | 6 | 0 | 3.152330  | 2.138613  | -1.208424 |
| 27 | 1 | 0 | 3.475564  | 1.222794  | -1.712419 |
| 28 | 1 | 0 | 2.307152  | 2.581372  | -1.744269 |
| 29 | 1 | 0 | 3.984748  | 2.848824  | -1.151713 |
| 30 | 6 | 0 | 3.755441  | 1.047071  | 0.912218  |
| 31 | 1 | 0 | 3.360217  | 0.790021  | 1.899723  |
| 32 | 1 | 0 | 3.994343  | 0.131404  | 0.359943  |
| 33 | 1 | 0 | 4.645478  | 1.679947  | 1.004934  |
| 34 | 1 | 0 | 0.183396  | -0.719456 | -1.589774 |
| 35 | 6 | 0 | 1.642246  | -1.689189 | -0.412407 |
| 36 | 6 | 0 | 1.986190  | -2.457892 | 0.703000  |
| 37 | 6 | 0 | 2.594777  | -1.495005 | -1.415197 |
| 38 | 6 | 0 | 3.266727  | -2.991619 | 0.823601  |

|    |   |   |          |           |           |
|----|---|---|----------|-----------|-----------|
| 39 | 1 | 0 | 1.237408 | -2.639822 | 1.472862  |
| 40 | 6 | 0 | 3.877088 | -2.032099 | -1.301399 |
| 41 | 1 | 0 | 2.318142 | -0.928397 | -2.308262 |
| 42 | 6 | 0 | 4.218827 | -2.777476 | -0.174368 |
| 43 | 1 | 0 | 3.522836 | -3.586043 | 1.699934  |
| 44 | 1 | 0 | 4.603572 | -1.881473 | -2.100069 |
| 45 | 1 | 0 | 5.216525 | -3.204535 | -0.080770 |

---

E(RM06) = -3537.24223737

Zero-point correction = 0.355600 (Hartree/Particle)

Sum of electronic and thermal Energies= -3536.852243

Sum of electronic and thermal Enthalpies= -3536.851172

Sum of electronic and thermal Free Energies= -3536.959463

**Table S8.** Coordinates and energies for optimized geometry of (*E*)-INT4

| Center<br>Number | Atomic<br>Number | Atomic<br>Type | Coordinates (Angstroms) |           |           |
|------------------|------------------|----------------|-------------------------|-----------|-----------|
|                  |                  |                | X                       | Y         | Z         |
| 1                | 30               | 0              | 0.717358                | 1.981057  | -0.194260 |
| 2                | 8                | 0              | 2.171062                | 1.033868  | 0.652376  |
| 3                | 15               | 0              | 2.402931                | -0.437170 | 0.271532  |
| 4                | 6                | 0              | 0.998717                | -1.195781 | -0.342503 |
| 5                | 6                | 0              | -0.307492               | -0.696018 | 0.183484  |
| 6                | 8                | 0              | -0.651700               | 0.577856  | -0.483345 |

|    |    |   |           |           |           |
|----|----|---|-----------|-----------|-----------|
| 7  | 17 | 0 | 0.241531  | 4.076711  | -0.479854 |
| 8  | 8  | 0 | 3.017569  | -1.059873 | 1.626688  |
| 9  | 6  | 0 | 3.175488  | -2.480210 | 1.689560  |
| 10 | 1  | 0 | 2.200369  | -2.976831 | 1.599998  |
| 11 | 1  | 0 | 3.839197  | -2.839952 | 0.891406  |
| 12 | 1  | 0 | 3.618925  | -2.700727 | 2.663001  |
| 13 | 8  | 0 | 3.554340  | -0.627827 | -0.819791 |
| 14 | 6  | 0 | 4.884031  | -0.187768 | -0.521760 |
| 15 | 1  | 0 | 4.876622  | 0.851194  | -0.171010 |
| 16 | 1  | 0 | 5.341719  | -0.831372 | 0.238363  |
| 17 | 1  | 0 | 5.447024  | -0.258368 | -1.454502 |
| 18 | 6  | 0 | 1.100136  | -2.242558 | -1.265688 |
| 19 | 7  | 0 | 1.194789  | -3.130218 | -2.027890 |
| 20 | 1  | 0 | -1.597711 | 0.872249  | -0.205386 |
| 21 | 7  | 0 | -3.022372 | 1.500823  | 0.370258  |
| 22 | 6  | 0 | -4.144582 | 0.568676  | 0.328994  |
| 23 | 1  | 0 | -4.357061 | 0.293132  | -0.710916 |
| 24 | 1  | 0 | -3.895054 | -0.344125 | 0.885279  |
| 25 | 1  | 0 | -5.053397 | 1.019870  | 0.769467  |
| 26 | 6  | 0 | -3.317719 | 2.694971  | -0.417907 |
| 27 | 1  | 0 | -2.454755 | 3.373069  | -0.404804 |
| 28 | 1  | 0 | -3.523211 | 2.407874  | -1.456268 |

|    |   |   |           |           |           |
|----|---|---|-----------|-----------|-----------|
| 29 | 1 | 0 | -4.198642 | 3.230899  | -0.018397 |
| 30 | 6 | 0 | -2.700842 | 1.860376  | 1.747293  |
| 31 | 1 | 0 | -2.451102 | 0.955144  | 2.317091  |
| 32 | 1 | 0 | -1.838532 | 2.541190  | 1.761211  |
| 33 | 1 | 0 | -3.549356 | 2.364586  | 2.245676  |
| 34 | 1 | 0 | -0.214052 | -0.451107 | 1.256941  |
| 35 | 6 | 0 | -1.445824 | -1.662927 | 0.021109  |
| 36 | 6 | 0 | -1.893943 | -2.387350 | 1.126428  |
| 37 | 6 | 0 | -2.047268 | -1.866042 | -1.222685 |
| 38 | 6 | 0 | -2.932439 | -3.306946 | 0.994460  |
| 39 | 1 | 0 | -1.423403 | -2.228997 | 2.099036  |
| 40 | 6 | 0 | -3.087169 | -2.781497 | -1.354846 |
| 41 | 1 | 0 | -1.696187 | -1.304453 | -2.088529 |
| 42 | 6 | 0 | -3.533044 | -3.502419 | -0.247437 |
| 43 | 1 | 0 | -3.273822 | -3.868069 | 1.863170  |
| 44 | 1 | 0 | -3.548504 | -2.936938 | -2.329081 |
| 45 | 1 | 0 | -4.345175 | -4.219972 | -0.354440 |

---

E(RM06) = -3537.24640448

Zero-point correction = 0.354702 (Hartree/Particle)

Sum of electronic and thermal Energies= -3536.858534

Sum of electronic and thermal Enthalpies= -3536.857463

Sum of electronic and thermal Free Energies= -3536.962781

**Table S9.** Coordinates and energies for optimized geometry of (*E*)-**TS3**

| Center<br>Number | Atomic<br>Number | Atomic<br>Type | Coordinates (Angstroms) |           |           |
|------------------|------------------|----------------|-------------------------|-----------|-----------|
|                  |                  |                | X                       | Y         | Z         |
| 1                | 30               | 0              | 0.400291                | 1.992266  | -0.219548 |
| 2                | 8                | 0              | 2.076345                | 1.144279  | 0.463659  |
| 3                | 15               | 0              | 2.500110                | -0.293394 | 0.245278  |
| 4                | 6                | 0              | 1.176849                | -1.383420 | -0.138239 |
| 5                | 6                | 0              | -0.085815               | -1.035872 | 0.358306  |
| 6                | 8                | 0              | -0.644487               | 0.516049  | -0.738883 |
| 7                | 17               | 0              | 0.194659                | 4.135772  | 0.084765  |
| 8                | 8                | 0              | 3.286650                | -0.713988 | 1.576481  |
| 9                | 6                | 0              | 3.734868                | -2.069239 | 1.706158  |
| 10               | 1                | 0              | 2.876849                | -2.750653 | 1.759963  |
| 11               | 1                | 0              | 4.375681                | -2.352603 | 0.861074  |
| 12               | 1                | 0              | 4.305805                | -2.117655 | 2.635361  |
| 13               | 8                | 0              | 3.532391                | -0.494759 | -0.951006 |
| 14               | 6                | 0              | 4.764945                | 0.239351  | -0.941602 |
| 15               | 1                | 0              | 4.565119                | 1.316567  | -0.920001 |
| 16               | 1                | 0              | 5.373184                | -0.044606 | -0.074382 |
| 17               | 1                | 0              | 5.285829                | -0.024956 | -1.863458 |
| 18               | 6                | 0              | 1.408686                | -2.453195 | -1.029504 |

|    |   |   |           |           |           |
|----|---|---|-----------|-----------|-----------|
| 19 | 7 | 0 | 1.644682  | -3.351506 | -1.739687 |
| 20 | 1 | 0 | -1.600559 | 0.720663  | -0.560462 |
| 21 | 7 | 0 | -3.225407 | 1.391510  | -0.029340 |
| 22 | 6 | 0 | -4.288092 | 0.426415  | -0.254959 |
| 23 | 1 | 0 | -4.352470 | 0.187488  | -1.324207 |
| 24 | 1 | 0 | -4.070325 | -0.500485 | 0.293424  |
| 25 | 1 | 0 | -5.272001 | 0.812638  | 0.079569  |
| 26 | 6 | 0 | -3.452739 | 2.611153  | -0.788980 |
| 27 | 1 | 0 | -2.624335 | 3.313533  | -0.624783 |
| 28 | 1 | 0 | -3.503797 | 2.375796  | -1.859616 |
| 29 | 1 | 0 | -4.397843 | 3.109586  | -0.494034 |
| 30 | 6 | 0 | -3.078645 | 1.682481  | 1.386620  |
| 31 | 1 | 0 | -2.836712 | 0.760184  | 1.933353  |
| 32 | 1 | 0 | -2.266181 | 2.406753  | 1.537204  |
| 33 | 1 | 0 | -4.005357 | 2.109716  | 1.819633  |
| 34 | 1 | 0 | -0.095474 | -0.413710 | 1.255594  |
| 35 | 6 | 0 | -1.277574 | -1.885576 | 0.213865  |
| 36 | 6 | 0 | -2.029446 | -2.187294 | 1.354622  |
| 37 | 6 | 0 | -1.671289 | -2.403031 | -1.025720 |
| 38 | 6 | 0 | -3.139464 | -3.023112 | 1.267050  |
| 39 | 1 | 0 | -1.729498 | -1.776119 | 2.319773  |
| 40 | 6 | 0 | -2.788978 | -3.224171 | -1.113414 |

|    |   |   |           |           |           |
|----|---|---|-----------|-----------|-----------|
| 41 | 1 | 0 | -1.110906 | -2.140900 | -1.921662 |
| 42 | 6 | 0 | -3.520651 | -3.542041 | 0.031622  |
| 43 | 1 | 0 | -3.709514 | -3.264322 | 2.162822  |
| 44 | 1 | 0 | -3.092735 | -3.619061 | -2.081428 |
| 45 | 1 | 0 | -4.392399 | -4.190408 | -0.041249 |

---

$E(\text{RM06}) = -3537.23189944$

Zero-point correction= 0.353193 (Hartree/Particle)

Sum of electronic and thermal Energies= -3536.844452

Sum of electronic and thermal Enthalpies= -3536.843381

Sum of electronic and thermal Free Energies= -3536.951357

**Table S10.** Coordinates and energies for optimized geometry of (*E*)-**P**

| Center<br>Number | Atomic<br>Number | Atomic<br>Type | Coordinates (Angstroms) |          |          |
|------------------|------------------|----------------|-------------------------|----------|----------|
|                  |                  |                | X                       | Y        | Z        |
| 1                | 8                | 0              | 2.03231                 | 0.721563 | -1.37996 |
| 2                | 15               | 0              | 2.540713                | -0.44992 | -0.63553 |
| 3                | 6                | 0              | 1.244056                | -1.56451 | -0.05271 |
| 4                | 6                | 0              | -0.0064                 | -1.36016 | -0.54275 |
| 5                | 8                | 0              | 3.565343                | -1.28796 | -1.54163 |
| 6                | 6                | 0              | 4.227446                | -2.46215 | -1.06466 |
| 7                | 1                | 0              | 3.534384                | -3.31183 | -1.04738 |
| 8                | 1                | 0              | 4.642453                | -2.3041  | -0.06127 |

|    |   |   |          |          |          |
|----|---|---|----------|----------|----------|
| 9  | 1 | 0 | 5.036055 | -2.66912 | -1.76922 |
| 10 | 8 | 0 | 3.324156 | -0.16861 | 0.733761 |
| 11 | 6 | 0 | 4.426677 | 0.747055 | 0.71074  |
| 12 | 1 | 0 | 4.09709  | 1.730147 | 0.356494 |
| 13 | 1 | 0 | 5.228441 | 0.367979 | 0.064342 |
| 14 | 1 | 0 | 4.787056 | 0.822726 | 1.738303 |
| 15 | 6 | 0 | 1.609327 | -2.57465 | 0.87702  |
| 16 | 7 | 0 | 1.968616 | -3.38704 | 1.631865 |
| 17 | 1 | 0 | -0.08363 | -0.51979 | -1.23766 |
| 18 | 6 | 0 | -1.25693 | -2.055   | -0.30176 |
| 19 | 6 | 0 | -2.3853  | -1.58309 | -0.99556 |
| 20 | 6 | 0 | -1.41009 | -3.14863 | 0.568846 |
| 21 | 6 | 0 | -3.62679 | -2.18213 | -0.83243 |
| 22 | 1 | 0 | -2.27535 | -0.73455 | -1.67072 |
| 23 | 6 | 0 | -2.65265 | -3.74445 | 0.730552 |
| 24 | 1 | 0 | -0.56054 | -3.53833 | 1.123898 |
| 25 | 6 | 0 | -3.76206 | -3.26564 | 0.032646 |
| 26 | 1 | 0 | -4.48879 | -1.80411 | -1.37846 |
| 27 | 1 | 0 | -2.7581  | -4.58986 | 1.407615 |
| 28 | 1 | 0 | -4.73325 | -3.73922 | 0.165344 |

---

E(RM06) = -1047.74374704

Zero-point correction= 0.214897 (Hartree/Particle)

Sum of electronic and thermal Energies = -1047.508536



Sum of electronic and thermal Enthalpies = -1047.507465

Sum of electronic and thermal Free Energies = -1047.582959

## 1.2.2 For (*E*)-product

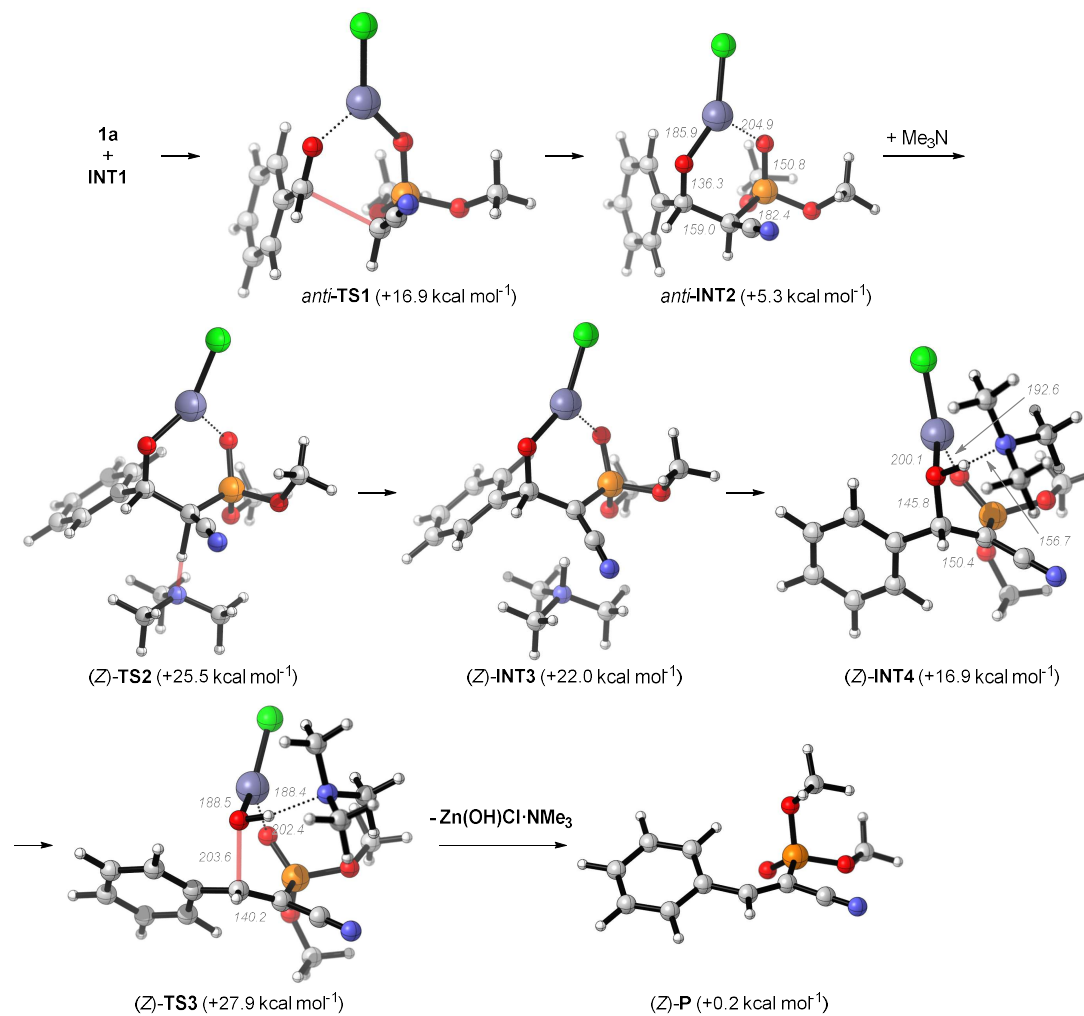

**Table S11.** Coordinates and energies for optimized geometry of *anti*-TS1

| Center | Atomic | Atomic | Coordinates (Angstroms) |
|--------|--------|--------|-------------------------|
|--------|--------|--------|-------------------------|

| Number | Number | Type | X         | Y         | Z         |
|--------|--------|------|-----------|-----------|-----------|
| 1      | 30     | 0    | -1.699255 | -1.114172 | -0.183203 |
| 2      | 8      | 0    | -1.040388 | 0.578436  | -0.848169 |
| 3      | 15     | 0    | -0.058726 | 1.601153  | -0.270432 |
| 4      | 6      | 0    | 0.167005  | 1.419040  | 1.437047  |
| 5      | 6      | 0    | 0.627582  | -0.952247 | 1.627156  |
| 6      | 8      | 0    | -0.445468 | -1.500629 | 1.265817  |
| 7      | 17     | 0    | -3.225329 | -2.469472 | -0.871252 |
| 8      | 8      | 0    | -0.523042 | 3.045813  | -0.795403 |
| 9      | 6      | 0    | -1.863668 | 3.485522  | -0.548657 |
| 10     | 1      | 0    | -2.585052 | 2.767984  | -0.956125 |
| 11     | 1      | 0    | -2.032888 | 3.619174  | 0.527161  |
| 12     | 1      | 0    | -1.972130 | 4.447193  | -1.054377 |
| 13     | 8      | 0    | 1.403119  | 1.511559  | -0.881963 |
| 14     | 6      | 0    | 1.590980  | 1.540929  | -2.301043 |
| 15     | 1      | 0    | 1.086824  | 0.685050  | -2.765805 |
| 16     | 1      | 0    | 1.210780  | 2.479250  | -2.719877 |
| 17     | 1      | 0    | 2.667687  | 1.467737  | -2.466043 |
| 18     | 6      | 0    | -1.009168 | 1.386628  | 2.206686  |
| 19     | 7      | 0    | -2.003534 | 1.268644  | 2.816876  |
| 20     | 1      | 0    | 1.033756  | 1.930027  | 1.859623  |
| 21     | 1      | 0    | 0.736940  | -0.690990 | 2.690953  |

|    |   |   |          |           |           |
|----|---|---|----------|-----------|-----------|
| 22 | 6 | 0 | 1.870745 | -1.016541 | 0.852162  |
| 23 | 6 | 0 | 1.929637 | -1.667878 | -0.384321 |
| 24 | 6 | 0 | 3.130955 | -1.725815 | -1.082144 |
| 25 | 6 | 0 | 4.276494 | -1.134157 | -0.550418 |
| 26 | 6 | 0 | 4.227418 | -0.500652 | 0.692924  |
| 27 | 6 | 0 | 3.031009 | -0.451295 | 1.393914  |
| 28 | 1 | 0 | 1.042212 | -2.153550 | -0.789455 |
| 29 | 1 | 0 | 3.177395 | -2.238526 | -2.041546 |
| 30 | 1 | 0 | 5.215651 | -1.178182 | -1.099935 |
| 31 | 1 | 0 | 5.125957 | -0.053061 | 1.113991  |
| 32 | 1 | 0 | 2.979057 | 0.043620  | 2.365075  |

---

E(RM06) = -3362.88325132

Zero-point correction= 0.229897 (Hartree/Particle)

Sum of electronic and thermal Energies= -3362.627418

Sum of electronic and thermal Enthalpies= -3362.626347

Sum of electronic and thermal Free Energies= -3362.715339

**Table S12.** Coordinates and energies for optimized geometry of *anti*-INT2

| Center | Atomic | Atomic | Coordinates (Angstroms) |           |           |
|--------|--------|--------|-------------------------|-----------|-----------|
| Number | Number | Type   | X                       | Y         | Z         |
| 1      | 30     | 0      | 1.382123                | 1.450134  | 0.217536  |
| 2      | 8      | 0      | 1.254051                | -0.234512 | -0.942351 |

|    |    |   |           |           |           |
|----|----|---|-----------|-----------|-----------|
| 3  | 15 | 0 | 0.382385  | -1.404144 | -0.560477 |
| 4  | 6  | 0 | -0.131337 | -1.372212 | 1.189674  |
| 5  | 6  | 0 | -0.674352 | 0.041147  | 1.674431  |
| 6  | 8  | 0 | 0.294379  | 0.999896  | 1.655884  |
| 7  | 17 | 0 | 2.558278  | 2.995846  | -0.724172 |
| 8  | 8  | 0 | 1.096538  | -2.791734 | -0.854042 |
| 9  | 6  | 0 | 2.532439  | -2.918580 | -0.890815 |
| 10 | 1  | 0 | 2.956153  | -2.190175 | -1.588068 |
| 11 | 1  | 0 | 2.951096  | -2.776243 | 0.110902  |
| 12 | 1  | 0 | 2.730772  | -3.934148 | -1.236921 |
| 13 | 8  | 0 | -0.997111 | -1.511427 | -1.319330 |
| 14 | 6  | 0 | -1.077932 | -1.211624 | -2.723558 |
| 15 | 1  | 0 | -0.709920 | -0.197105 | -2.911218 |
| 16 | 1  | 0 | -0.498489 | -1.942712 | -3.298438 |
| 17 | 1  | 0 | -2.135731 | -1.279687 | -2.982134 |
| 18 | 6  | 0 | 1.013351  | -1.761055 | 1.999364  |
| 19 | 7  | 0 | 1.945439  | -2.057232 | 2.626937  |
| 20 | 1  | 0 | -0.915192 | -2.137971 | 1.297836  |
| 21 | 1  | 0 | -0.962462 | -0.156492 | 2.726897  |
| 22 | 6  | 0 | -1.953121 | 0.377015  | 0.920315  |
| 23 | 6  | 0 | -2.035373 | 1.480702  | 0.075113  |
| 24 | 6  | 0 | -3.204852 | 1.744282  | -0.638355 |

|    |   |   |           |           |           |
|----|---|---|-----------|-----------|-----------|
| 25 | 6 | 0 | -4.311540 | 0.912159  | -0.498589 |
| 26 | 6 | 0 | -4.251864 | -0.172203 | 0.378035  |
| 27 | 6 | 0 | -3.083745 | -0.429073 | 1.086262  |
| 28 | 1 | 0 | -1.187315 | 2.159535  | -0.013194 |
| 29 | 1 | 0 | -3.250828 | 2.611144  | -1.296182 |
| 30 | 1 | 0 | -5.225973 | 1.118618  | -1.052817 |
| 31 | 1 | 0 | -5.121397 | -0.813513 | 0.514945  |
| 32 | 1 | 0 | -3.051872 | -1.273001 | 1.779275  |

---

E(RM06) = -3362.90667280

Zero-point correction = 0.233327 (Hartree/Particle)

Sum of electronic and thermal Energies= -3362.647889

Sum of electronic and thermal Enthalpies= -3362.646818

Sum of electronic and thermal Free Energies= -3362.733880

**Table S13.** Coordinates and energies for optimized geometry of (Z)-TS2

| Center | Atomic | Atomic | Coordinates (Angstroms) |           |           |
|--------|--------|--------|-------------------------|-----------|-----------|
| Number | Number | Type   | X                       | Y         | Z         |
| 1      | 30     | 0      | -2.468179               | 0.842436  | -0.423755 |
| 2      | 8      | 0      | -1.628049               | -0.193467 | 1.115036  |
| 3      | 15     | 0      | -0.457202               | -1.093877 | 0.758860  |
| 4      | 6      | 0      | 0.372033                | -0.737165 | -0.760638 |
| 5      | 6      | 0      | 0.251687                | 0.714944  | -1.333123 |

|    |    |   |           |           |           |
|----|----|---|-----------|-----------|-----------|
| 6  | 8  | 0 | -1.038179 | 1.160700  | -1.554187 |
| 7  | 17 | 0 | -4.606920 | 1.048303  | -0.121435 |
| 8  | 8  | 0 | -0.884793 | -2.636554 | 0.793896  |
| 9  | 6  | 0 | -2.161547 | -3.013266 | 0.249796  |
| 10 | 1  | 0 | -2.967896 | -2.508289 | 0.792850  |
| 11 | 1  | 0 | -2.214449 | -2.769988 | -0.819340 |
| 12 | 1  | 0 | -2.240513 | -4.094339 | 0.378047  |
| 13 | 8  | 0 | 0.674084  | -1.037592 | 1.888581  |
| 14 | 6  | 0 | 0.276552  | -0.998394 | 3.265448  |
| 15 | 1  | 0 | -0.284476 | -0.079601 | 3.469722  |
| 16 | 1  | 0 | -0.334546 | -1.873833 | 3.515824  |
| 17 | 1  | 0 | 1.197697  | -1.011905 | 3.852537  |
| 18 | 6  | 0 | 0.122145  | -1.726315 | -1.754008 |
| 19 | 7  | 0 | 0.008327  | -2.539812 | -2.588366 |
| 20 | 1  | 0 | 1.807058  | -0.979767 | -0.456717 |
| 21 | 1  | 0 | 0.752143  | 0.631652  | -2.319556 |
| 22 | 6  | 0 | 1.092015  | 1.704097  | -0.535731 |
| 23 | 6  | 0 | 0.771736  | 2.095067  | 0.769301  |
| 24 | 6  | 0 | 1.577103  | 2.993981  | 1.462410  |
| 25 | 6  | 0 | 2.711773  | 3.536910  | 0.858314  |
| 26 | 6  | 0 | 3.022991  | 3.183885  | -0.451761 |
| 27 | 6  | 0 | 2.215023  | 2.276842  | -1.137704 |

|    |   |   |           |           |           |
|----|---|---|-----------|-----------|-----------|
| 28 | 1 | 0 | -0.118498 | 1.699921  | 1.258541  |
| 29 | 1 | 0 | 1.312431  | 3.279539  | 2.480178  |
| 30 | 1 | 0 | 3.336432  | 4.244524  | 1.401583  |
| 31 | 1 | 0 | 3.889126  | 3.622067  | -0.946660 |
| 32 | 1 | 0 | 2.451378  | 2.022355  | -2.173250 |
| 33 | 7 | 0 | 3.001486  | -1.329062 | -0.335002 |
| 34 | 6 | 0 | 2.927120  | -2.756044 | 0.020048  |
| 35 | 1 | 0 | 2.420936  | -2.860674 | 0.985305  |
| 36 | 1 | 0 | 2.351478  | -3.286552 | -0.747238 |
| 37 | 1 | 0 | 3.937432  | -3.183907 | 0.084783  |
| 38 | 6 | 0 | 3.685815  | -0.543697 | 0.703561  |
| 39 | 1 | 0 | 3.704910  | 0.510720  | 0.405083  |
| 40 | 1 | 0 | 3.135692  | -0.640353 | 1.644062  |
| 41 | 1 | 0 | 4.715085  | -0.909725 | 0.831529  |
| 42 | 6 | 0 | 3.629588  | -1.143600 | -1.652607 |
| 43 | 1 | 0 | 3.056344  | -1.690795 | -2.409209 |
| 44 | 1 | 0 | 3.632311  | -0.076952 | -1.901388 |
| 45 | 1 | 0 | 4.663590  | -1.516217 | -1.635417 |

---

E(RM06) = -3537.23662953

Zero-point correction= 0.352031 (Hartree/Particle)

Sum of electronic and thermal Energies=-3536.852288

Sum of electronic and thermal Enthalpies= -3536.851218



Sum of electronic and thermal Free Energies= -3536.951920

**Table S14.** Coordinates and energies for optimized geometry of (Z)-INT3

| Center<br>Number | Atomic<br>Number | Atomic<br>Type | Coordinates (Angstroms) |           |           |
|------------------|------------------|----------------|-------------------------|-----------|-----------|
|                  |                  |                | X                       | Y         | Z         |
| 1                | 30               | 0              | -2.578463               | 0.809671  | -0.287330 |
| 2                | 8                | 0              | -1.670514               | -0.376262 | 1.077084  |
| 3                | 15               | 0              | -0.514112               | -1.220173 | 0.557942  |
| 4                | 6                | 0              | 0.207367                | -0.650746 | -0.900122 |
| 5                | 6                | 0              | 0.069542                | 0.822293  | -1.353874 |
| 6                | 8                | 0              | -1.222626               | 1.316400  | -1.439742 |
| 7                | 17               | 0              | -4.718100               | 0.984326  | 0.054193  |
| 8                | 8                | 0              | -0.915562               | -2.770152 | 0.431077  |
| 9                | 6                | 0              | -2.055434               | -3.102108 | -0.372835 |
| 10               | 1                | 0              | -2.936928               | -2.538721 | -0.041058 |
| 11               | 1                | 0              | -1.849538               | -2.896324 | -1.431207 |
| 12               | 1                | 0              | -2.230532               | -4.171277 | -0.236519 |
| 13               | 8                | 0              | 0.622247                | -1.323118 | 1.699695  |
| 14               | 6                | 0              | 0.229287                | -1.559478 | 3.056296  |
| 15               | 1                | 0              | -0.397677               | -0.736129 | 3.416890  |
| 16               | 1                | 0              | -0.314410               | -2.508167 | 3.139463  |
| 17               | 1                | 0              | 1.150338                | -1.609982 | 3.643896  |

|    |   |   |           |           |           |
|----|---|---|-----------|-----------|-----------|
| 18 | 6 | 0 | 0.558707  | -1.613952 | -1.850747 |
| 19 | 7 | 0 | 0.937239  | -2.412320 | -2.629280 |
| 20 | 1 | 0 | 2.120633  | -0.804185 | -0.220871 |
| 21 | 1 | 0 | 0.505913  | 0.820306  | -2.373655 |
| 22 | 6 | 0 | 0.959391  | 1.750418  | -0.533179 |
| 23 | 6 | 0 | 0.707212  | 2.033967  | 0.815835  |
| 24 | 6 | 0 | 1.532655  | 2.895420  | 1.531332  |
| 25 | 6 | 0 | 2.628512  | 3.501502  | 0.912839  |
| 26 | 6 | 0 | 2.881423  | 3.243136  | -0.431454 |
| 27 | 6 | 0 | 2.047811  | 2.378590  | -1.143576 |
| 28 | 1 | 0 | -0.146827 | 1.579475  | 1.320325  |
| 29 | 1 | 0 | 1.315777  | 3.103481  | 2.578825  |
| 30 | 1 | 0 | 3.268345  | 4.181456  | 1.473635  |
| 31 | 1 | 0 | 3.717609  | 3.727929  | -0.935015 |
| 32 | 1 | 0 | 2.234305  | 2.201767  | -2.205476 |
| 33 | 7 | 0 | 3.138703  | -1.055105 | -0.115044 |
| 34 | 6 | 0 | 3.195078  | -2.513093 | 0.174356  |
| 35 | 1 | 0 | 2.666894  | -2.704475 | 1.111460  |
| 36 | 1 | 0 | 2.707440  | -3.049061 | -0.646132 |
| 37 | 1 | 0 | 4.245590  | -2.811822 | 0.256177  |
| 38 | 6 | 0 | 3.705690  | -0.246742 | 0.993882  |
| 39 | 1 | 0 | 3.597197  | 0.815769  | 0.748946  |

|    |   |   |          |           |           |
|----|---|---|----------|-----------|-----------|
| 40 | 1 | 0 | 3.156343 | -0.473588 | 1.911930  |
| 41 | 1 | 0 | 4.764346 | -0.504260 | 1.108404  |
| 42 | 6 | 0 | 3.799052 | -0.744893 | -1.411904 |
| 43 | 1 | 0 | 3.288646 | -1.301307 | -2.204648 |
| 44 | 1 | 0 | 3.720814 | 0.330927  | -1.594608 |
| 45 | 1 | 0 | 4.851279 | -1.041735 | -1.347012 |

---

E(RM06) = -3537.24115733

Zero-point correction= 0.356767 (Hartree/Particle)

Sum of electronic and thermal Energies= -3536.851073

Sum of electronic and thermal Enthalpies= -3536.850002

Sum of electronic and thermal Free Energies= -3536.957497

**Table S15.** Coordinates and energies for optimized geometry of (Z)-INT4

| Center | Atomic | Atomic | Coordinates (Angstroms) |           |           |
|--------|--------|--------|-------------------------|-----------|-----------|
| Number | Number | Type   | X                       | Y         | Z         |
| 1      | 30     | 0      | 0.769023                | -1.040171 | -1.246070 |
| 2      | 8      | 0      | -0.569665               | 0.275478  | -1.676980 |
| 3      | 15     | 0      | -0.808829               | 1.447317  | -0.715977 |
| 4      | 6      | 0      | -0.501248               | 1.060745  | 0.923822  |
| 5      | 6      | 0      | -0.424481               | -0.381354 | 1.342670  |
| 6      | 8      | 0      | 0.723305                | -1.061320 | 0.754699  |
| 7      | 17     | 0      | 2.320001                | -2.179883 | -2.228091 |

|    |   |   |           |           |           |
|----|---|---|-----------|-----------|-----------|
| 8  | 8 | 0 | -2.299390 | 1.932018  | -1.087712 |
| 9  | 6 | 0 | -2.894785 | 2.945673  | -0.274899 |
| 10 | 1 | 0 | -2.995655 | 2.599282  | 0.762276  |
| 11 | 1 | 0 | -2.295754 | 3.866453  | -0.287187 |
| 12 | 1 | 0 | -3.882870 | 3.141711  | -0.696732 |
| 13 | 8 | 0 | 0.105105  | 2.720357  | -1.062397 |
| 14 | 6 | 0 | -0.008536 | 3.326150  | -2.354925 |
| 15 | 1 | 0 | 0.138973  | 2.577488  | -3.142756 |
| 16 | 1 | 0 | -0.989366 | 3.800177  | -2.479147 |
| 17 | 1 | 0 | 0.777099  | 4.082351  | -2.412155 |
| 18 | 6 | 0 | -0.132141 | 2.067706  | 1.817895  |
| 19 | 7 | 0 | 0.190640  | 2.898021  | 2.585493  |
| 20 | 1 | 0 | 1.593317  | -0.590799 | 1.100920  |
| 21 | 7 | 0 | 2.967782  | 0.050497  | 1.494989  |
| 22 | 6 | 0 | 2.973528  | 0.443047  | 2.903110  |
| 23 | 1 | 0 | 2.230611  | 1.233009  | 3.068368  |
| 24 | 1 | 0 | 2.720383  | -0.424013 | 3.526205  |
| 25 | 1 | 0 | 3.966802  | 0.819467  | 3.207635  |
| 26 | 6 | 0 | 3.210116  | 1.205028  | 0.632962  |
| 27 | 1 | 0 | 3.174787  | 0.895800  | -0.420977 |
| 28 | 1 | 0 | 2.437665  | 1.964950  | 0.804480  |
| 29 | 1 | 0 | 4.201986  | 1.650366  | 0.830037  |

|    |   |   |           |           |          |
|----|---|---|-----------|-----------|----------|
| 30 | 6 | 0 | 3.944918  | -1.006279 | 1.242355 |
| 31 | 1 | 0 | 3.717310  | -1.873454 | 1.874631 |
| 32 | 1 | 0 | 3.892515  | -1.317744 | 0.190538 |
| 33 | 1 | 0 | 4.972261  | -0.665213 | 1.463386 |
| 34 | 1 | 0 | -0.248266 | -0.392891 | 2.431620 |
| 35 | 6 | 0 | -1.645933 | -1.232683 | 1.056695 |
| 36 | 6 | 0 | -1.530890 | -2.589670 | 0.738631 |
| 37 | 6 | 0 | -2.923497 | -0.683146 | 1.190876 |
| 38 | 6 | 0 | -2.668033 | -3.367022 | 0.523603 |
| 39 | 1 | 0 | -0.544869 | -3.045843 | 0.663384 |
| 40 | 6 | 0 | -4.059654 | -1.460156 | 0.986613 |
| 41 | 1 | 0 | -3.021543 | 0.368280  | 1.459495 |
| 42 | 6 | 0 | -3.935964 | -2.805517 | 0.643701 |
| 43 | 1 | 0 | -2.557949 | -4.419397 | 0.265261 |
| 44 | 1 | 0 | -5.046141 | -1.010865 | 1.092721 |
| 45 | 1 | 0 | -4.823763 | -3.412766 | 0.474387 |

---

$E(\text{RM06}) = -3537.25055740$

Zero-point correction= 0.354887 (Hartree/Particle)

Sum of electronic and thermal Energies= -3536.862034

Sum of electronic and thermal Enthalpies=-3536.860964

Sum of electronic and thermal Free Energies= -3536.965637

**Table S16.** Coordinates and energies for optimized geometry of (Z)-TS3

| Center | Atomic | Atomic | Coordinates (Angstroms) |           |           |
|--------|--------|--------|-------------------------|-----------|-----------|
| Number | Number | Type   | X                       | Y         | Z         |
| 1      | 30     | 0      | 0.476577                | -1.277025 | -1.002798 |
| 2      | 8      | 0      | -0.536369               | 0.401388  | -1.504673 |
| 3      | 15     | 0      | -0.467605               | 1.596413  | -0.580304 |
| 4      | 6      | 0      | -0.485755               | 1.175290  | 1.133268  |
| 5      | 6      | 0      | -0.969259               | -0.070198 | 1.558505  |
| 6      | 8      | 0      | 0.321009                | -1.483246 | 0.864400  |
| 7      | 17     | 0      | 1.682668                | -1.978114 | -2.676136 |
| 8      | 8      | 0      | -1.637089               | 2.593100  | -1.028174 |
| 9      | 6      | 0      | -1.832034               | 3.799247  | -0.277968 |
| 10     | 1      | 0      | -2.101350               | 3.564426  | 0.760776  |
| 11     | 1      | 0      | -0.925475               | 4.417112  | -0.293393 |
| 12     | 1      | 0      | -2.653133               | 4.332493  | -0.760544 |
| 13     | 8      | 0      | 0.885731                | 2.432055  | -0.719088 |
| 14     | 6      | 0      | 1.368374                | 2.753856  | -2.031414 |
| 15     | 1      | 0      | 1.518758                | 1.836486  | -2.613787 |
| 16     | 1      | 0      | 0.662546                | 3.415781  | -2.548680 |
| 17     | 1      | 0      | 2.322019                | 3.265857  | -1.888457 |
| 18     | 6      | 0      | 0.374440                | 1.897588  | 1.992867  |
| 19     | 7      | 0      | 1.069538                | 2.502408  | 2.713025  |

|    |   |   |           |           |           |
|----|---|---|-----------|-----------|-----------|
| 20 | 1 | 0 | 1.203186  | -1.176974 | 1.200968  |
| 21 | 7 | 0 | 3.016574  | -0.686145 | 1.339138  |
| 22 | 6 | 0 | 3.317526  | -0.397891 | 2.733402  |
| 23 | 1 | 0 | 2.784199  | 0.508943  | 3.047457  |
| 24 | 1 | 0 | 2.992863  | -1.236257 | 3.363401  |
| 25 | 1 | 0 | 4.403615  | -0.242807 | 2.894372  |
| 26 | 6 | 0 | 3.405753  | 0.429883  | 0.490507  |
| 27 | 1 | 0 | 3.130020  | 0.224353  | -0.554971 |
| 28 | 1 | 0 | 2.894154  | 1.343788  | 0.816256  |
| 29 | 1 | 0 | 4.499893  | 0.606625  | 0.526530  |
| 30 | 6 | 0 | 3.675410  | -1.909888 | 0.907242  |
| 31 | 1 | 0 | 3.336209  | -2.753084 | 1.523163  |
| 32 | 1 | 0 | 3.423518  | -2.121317 | -0.141261 |
| 33 | 1 | 0 | 4.778066  | -1.834153 | 0.992214  |
| 34 | 1 | 0 | -0.697763 | -0.339071 | 2.581479  |
| 35 | 6 | 0 | -2.193787 | -0.725708 | 1.061157  |
| 36 | 6 | 0 | -2.411588 | -2.089150 | 1.314024  |
| 37 | 6 | 0 | -3.205310 | 0.012781  | 0.436763  |
| 38 | 6 | 0 | -3.595678 | -2.699178 | 0.923434  |
| 39 | 1 | 0 | -1.626984 | -2.664205 | 1.801617  |
| 40 | 6 | 0 | -4.391444 | -0.600741 | 0.042659  |
| 41 | 1 | 0 | -3.084597 | 1.082927  | 0.277692  |

|    |   |   |           |           |           |
|----|---|---|-----------|-----------|-----------|
| 42 | 6 | 0 | -4.587865 | -1.957681 | 0.279491  |
| 43 | 1 | 0 | -3.747458 | -3.759235 | 1.120414  |
| 44 | 1 | 0 | -5.166355 | -0.011354 | -0.444305 |
| 45 | 1 | 0 | -5.516253 | -2.437314 | -0.026619 |

---

E(RM06) = -3537.23005100

Zero-point correction= 0.353657 (Hartree/Particle)

Sum of electronic and thermal Energies= -3536.842421

Sum of electronic and thermal Enthalpies= -3536.841350

Sum of electronic and thermal Free Energies= -3536.948110

**Table S17.** Coordinates and energies for optimized geometry of (Z)-P

| Center<br>Number | Atomic<br>Number | Atomic<br>Type | Coordinates (Angstroms) |          |           |
|------------------|------------------|----------------|-------------------------|----------|-----------|
|                  |                  |                | X                       | Y        | Z         |
| 1                | 8                | 0              | -0.744767               | 0.599723 | -1.807847 |
| 2                | 15               | 0              | -0.499810               | 1.624891 | -0.773450 |
| 3                | 6                | 0              | -0.404760               | 1.047085 | 0.941725  |
| 4                | 6                | 0              | -1.188650               | 0.094326 | 1.516048  |
| 5                | 8                | 0              | -1.642404               | 2.756600 | -0.825322 |
| 6                | 6                | 0              | -1.627202               | 3.843056 | 0.105125  |
| 7                | 1                | 0              | -1.853555               | 3.484827 | 1.117864  |
| 8                | 1                | 0              | -0.654010               | 4.350200 | 0.100899  |
| 9                | 1                | 0              | -2.405765               | 4.538132 | -0.215800 |



|    |   |   |           |           |           |
|----|---|---|-----------|-----------|-----------|
| 10 | 8 | 0 | 0.888099  | 2.415286  | -0.857623 |
| 11 | 6 | 0 | 1.274574  | 2.977725  | -2.118020 |
| 12 | 1 | 0 | 1.329973  | 2.195532  | -2.882796 |
| 13 | 1 | 0 | 0.560155  | 3.751900  | -2.425933 |
| 14 | 1 | 0 | 2.259214  | 3.423616  | -1.966421 |
| 15 | 6 | 0 | 0.615205  | 1.620733  | 1.758700  |
| 16 | 7 | 0 | 1.428769  | 2.101605  | 2.439912  |
| 17 | 1 | 0 | -0.894675 | -0.181887 | 2.532698  |
| 18 | 6 | 0 | -2.344336 | -0.641506 | 1.034346  |
| 19 | 6 | 0 | -2.660346 | -1.828555 | 1.719105  |
| 20 | 6 | 0 | -3.178505 | -0.228411 | -0.017607 |
| 21 | 6 | 0 | -3.744431 | -2.606279 | 1.337987  |
| 22 | 1 | 0 | -2.033242 | -2.143265 | 2.553344  |
| 23 | 6 | 0 | -4.273034 | -0.998804 | -0.384619 |
| 24 | 1 | 0 | -2.993670 | 0.705985  | -0.540951 |
| 25 | 6 | 0 | -4.553174 | -2.191584 | 0.281739  |
| 26 | 1 | 0 | -3.965058 | -3.529710 | 1.869700  |
| 27 | 1 | 0 | -4.915034 | -0.664211 | -1.197009 |
| 28 | 1 | 0 | -5.411308 | -2.791637 | -0.016032 |

---

E(RM06) = -1047.73757857

Zero-point correction= 0.214398 (Hartree/Particle)

Sum of electronic and thermal Energies= -1047.502667

Sum of electronic and thermal Enthalpies= -1047.501597

Sum of electronic and thermal Free Energies= -1047.577891

### 1.3 Reaction pathways for the Horner-Wadsworth-Emmons reaction

The HWE path from intermediate *syn*-INT2 was computed. Transition state TS4 ( $\Delta G_{338\text{ K}} = +26.3\text{ kcal mol}^{-1}$ ) was 4.0 kcal mol<sup>-1</sup> less stable than transition state TS2 for the Me<sub>3</sub>N-mediated deprotonation.

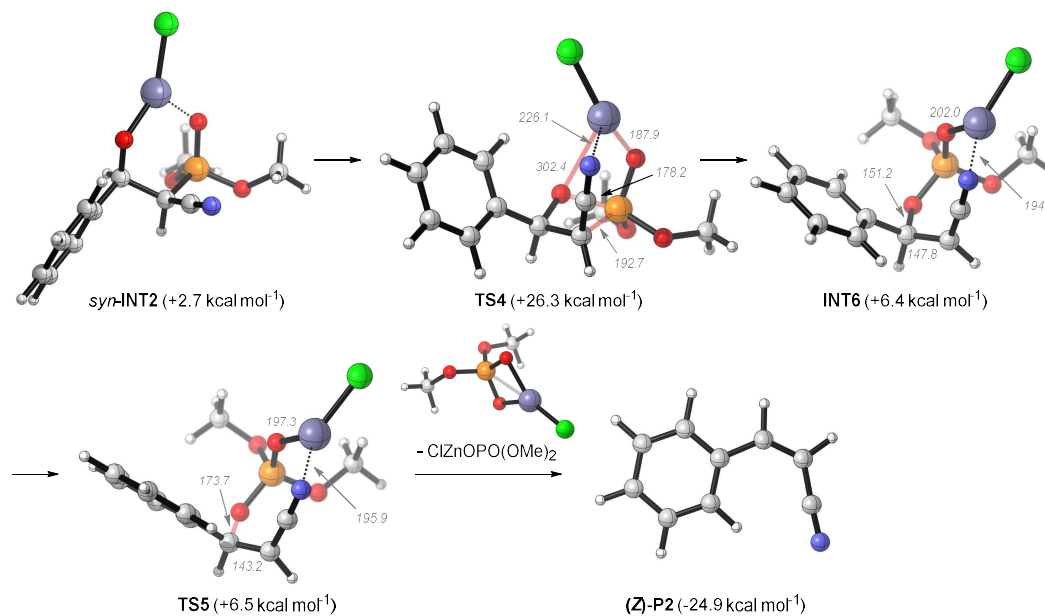

**Table S18.** Coordinates and energies for optimized geometry of TS4

| Center | Atomic | Atomic | Coordinates (Angstroms) |          |           |
|--------|--------|--------|-------------------------|----------|-----------|
| Number | Number | Type   | X                       | Y        | Z         |
| 1      | 30     | 0      | -0.314338               | 1.907383 | -0.127333 |

|    |    |   |           |           |           |
|----|----|---|-----------|-----------|-----------|
| 2  | 17 | 0 | 1.084297  | 3.418446  | 0.482485  |
| 3  | 8  | 0 | -1.845225 | 0.866486  | 0.191984  |
| 4  | 15 | 0 | -1.764556 | -0.686462 | 0.029308  |
| 5  | 8  | 0 | -2.822373 | -0.911577 | -1.233789 |
| 6  | 6  | 0 | -4.168046 | -0.474337 | -1.135672 |
| 7  | 1  | 0 | -4.224384 | 0.548203  | -0.739139 |
| 8  | 1  | 0 | -4.583576 | -0.489720 | -2.148480 |
| 9  | 1  | 0 | -4.752375 | -1.146058 | -0.494245 |
| 10 | 8  | 0 | -2.716015 | -1.496058 | 1.054333  |
| 11 | 6  | 0 | -2.492928 | -1.507808 | 2.462778  |
| 12 | 1  | 0 | -1.632121 | -2.133699 | 2.716364  |
| 13 | 1  | 0 | -2.328731 | -0.492997 | 2.844253  |
| 14 | 1  | 0 | -3.404012 | -1.922259 | 2.903524  |
| 15 | 6  | 0 | -0.376085 | -1.409543 | -1.094056 |
| 16 | 1  | 0 | -0.661954 | -2.203938 | -1.788028 |
| 17 | 6  | 0 | 0.130391  | -0.224303 | -1.718366 |
| 18 | 7  | 0 | 0.468506  | 0.865560  | -1.975284 |
| 19 | 6  | 0 | 0.410321  | -1.735005 | 0.193164  |
| 20 | 8  | 0 | -0.315443 | -0.879040 | 1.048749  |
| 21 | 1  | 0 | 0.228355  | -2.798223 | 0.437843  |
| 22 | 6  | 0 | 1.887424  | -1.462574 | 0.179905  |
| 23 | 6  | 0 | 2.432230  | -0.385928 | 0.876520  |

|    |   |   |          |           |           |
|----|---|---|----------|-----------|-----------|
| 24 | 6 | 0 | 3.800870 | -0.127297 | 0.806634  |
| 25 | 6 | 0 | 4.630236 | -0.943990 | 0.043490  |
| 26 | 6 | 0 | 4.089103 | -2.028259 | -0.648764 |
| 27 | 6 | 0 | 2.724459 | -2.287424 | -0.576747 |
| 28 | 1 | 0 | 1.781492 | 0.248589  | 1.477168  |
| 29 | 1 | 0 | 4.216365 | 0.720169  | 1.350091  |
| 30 | 1 | 0 | 5.698163 | -0.738891 | -0.012737 |
| 31 | 1 | 0 | 4.732674 | -2.671705 | -1.246984 |
| 32 | 1 | 0 | 2.300608 | -3.136211 | -1.118065 |

---

E(RM06) = -3362.87459325

Zero-point correction= 0.232901 (Hartree/Particle)

Sum of electronic and thermal Energies= -3362.617526

Sum of electronic and thermal Enthalpies= -3362.616455

Sum of electronic and thermal Free Energies= -3362.700380

**Table S19.** Coordinates and energies for optimized geometry of **INT6**

| Center | Atomic | Atomic | Coordinates (Angstroms) |           |           |
|--------|--------|--------|-------------------------|-----------|-----------|
| Number | Number | Type   | X                       | Y         | Z         |
| 1      | 30     | 0      | -1.472086               | -1.596679 | -0.180782 |
| 2      | 17     | 0      | -3.337623               | -2.099408 | -1.169461 |
| 3      | 8      | 0      | -0.884601               | 0.292347  | -0.586996 |
| 4      | 15     | 0      | -0.643243               | 1.589123  | 0.140667  |

|    |   |   |           |           |           |
|----|---|---|-----------|-----------|-----------|
| 5  | 8 | 0 | -1.635850 | 1.843440  | 1.345963  |
| 6  | 6 | 0 | -3.052080 | 1.789775  | 1.106508  |
| 7  | 1 | 0 | -3.330047 | 0.840993  | 0.631098  |
| 8  | 1 | 0 | -3.529218 | 1.867608  | 2.084845  |
| 9  | 1 | 0 | -3.354739 | 2.630221  | 0.472725  |
| 10 | 8 | 0 | -0.917042 | 2.832680  | -0.806094 |
| 11 | 6 | 0 | -0.260821 | 2.928067  | -2.076074 |
| 12 | 1 | 0 | 0.791253  | 3.199503  | -1.929388 |
| 13 | 1 | 0 | -0.339899 | 1.982111  | -2.624320 |
| 14 | 1 | 0 | -0.770319 | 3.720088  | -2.628020 |
| 15 | 6 | 0 | 0.784904  | -0.097291 | 2.262648  |
| 16 | 1 | 0 | 0.401755  | 0.254337  | 3.217630  |
| 17 | 6 | 0 | 0.260365  | -1.205701 | 1.709471  |
| 18 | 7 | 0 | -0.180846 | -2.174584 | 1.148805  |
| 19 | 6 | 0 | 1.621639  | 0.802728  | 1.441334  |
| 20 | 8 | 0 | 0.803567  | 1.831166  | 0.692752  |
| 21 | 1 | 0 | 2.195496  | 1.472345  | 2.094733  |
| 22 | 6 | 0 | 2.556016  | 0.131823  | 0.458406  |
| 23 | 6 | 0 | 2.786668  | 0.643433  | -0.820435 |
| 24 | 6 | 0 | 3.701635  | 0.033634  | -1.676647 |
| 25 | 6 | 0 | 4.411780  | -1.088787 | -1.260810 |
| 26 | 6 | 0 | 4.198860  | -1.597656 | 0.018890  |

|    |   |   |          |           |           |
|----|---|---|----------|-----------|-----------|
| 27 | 6 | 0 | 3.278994 | -0.993247 | 0.870201  |
| 28 | 1 | 0 | 2.248593 | 1.528416  | -1.152980 |
| 29 | 1 | 0 | 3.860015 | 0.444112  | -2.673052 |
| 30 | 1 | 0 | 5.127353 | -1.564616 | -1.929562 |
| 31 | 1 | 0 | 4.748203 | -2.475120 | 0.356857  |
| 32 | 1 | 0 | 3.111938 | -1.402182 | 1.866133  |

---

E(RM06) = -3362.90501973

Zero-point correction= 0.232792 (Hartree/Particle)

Sum of electronic and thermal Energies= -3362.647612

Sum of electronic and thermal Enthalpies= -3362.646541

Sum of electronic and thermal Free Energies= -3362.732142

**Table S20.** Coordinates and energies for optimized geometry of **TS5**

| Center | Atomic | Atomic | Coordinates (Angstroms) |           |           |
|--------|--------|--------|-------------------------|-----------|-----------|
| Number | Number | Type   | X                       | Y         | Z         |
| 1      | 30     | 0      | -1.653894               | -1.400820 | -0.197301 |
| 2      | 8      | 0      | -0.758339               | 0.324458  | -0.533111 |
| 3      | 15     | 0      | -0.447395               | 1.633714  | 0.166888  |
| 4      | 6      | 0      | 0.797294                | -0.368424 | 2.424643  |
| 5      | 6      | 0      | 1.722345                | 0.432412  | 1.679750  |
| 6      | 8      | 0      | 0.909700                | 1.743392  | 0.881798  |
| 7      | 17     | 0      | -3.503974               | -1.824786 | -1.242912 |

|    |   |   |           |           |           |
|----|---|---|-----------|-----------|-----------|
| 8  | 8 | 0 | -1.565316 | 2.022000  | 1.229233  |
| 9  | 6 | 0 | -2.934098 | 2.125926  | 0.818523  |
| 10 | 1 | 0 | -3.291905 | 1.177843  | 0.396785  |
| 11 | 1 | 0 | -3.506997 | 2.364669  | 1.716713  |
| 12 | 1 | 0 | -3.049367 | 2.927258  | 0.080355  |
| 13 | 6 | 0 | 0.245315  | 2.750440  | -2.080216 |
| 14 | 1 | 0 | 0.004778  | 3.638439  | -2.668305 |
| 15 | 1 | 0 | 1.314968  | 2.750792  | -1.835487 |
| 16 | 1 | 0 | -0.009387 | 1.847295  | -2.646815 |
| 17 | 6 | 0 | 0.078686  | -1.341183 | 1.802991  |
| 18 | 7 | 0 | -0.526263 | -2.177000 | 1.204309  |
| 19 | 1 | 0 | 0.452411  | -0.020183 | 3.395598  |
| 20 | 6 | 0 | 2.562286  | -0.152791 | 0.589477  |
| 21 | 6 | 0 | 3.216927  | 0.688005  | -0.321631 |
| 22 | 6 | 0 | 4.042835  | 0.162687  | -1.307469 |
| 23 | 6 | 0 | 4.243993  | -1.215329 | -1.392134 |
| 24 | 6 | 0 | 3.625088  | -2.056591 | -0.473451 |
| 25 | 6 | 0 | 2.795017  | -1.529330 | 0.514426  |
| 26 | 1 | 0 | 3.066452  | 1.763855  | -0.253526 |
| 27 | 1 | 0 | 4.536997  | 0.831985  | -2.010249 |
| 28 | 1 | 0 | 4.892151  | -1.627897 | -2.163772 |
| 29 | 1 | 0 | 3.789824  | -3.131972 | -0.517208 |

|    |   |   |           |           |           |
|----|---|---|-----------|-----------|-----------|
| 30 | 1 | 0 | 2.343541  | -2.198870 | 1.243457  |
| 31 | 8 | 0 | -0.538009 | 2.829416  | -0.886062 |
| 32 | 1 | 0 | 2.277257  | 1.126992  | 2.313215  |

---

E(RM06) = -3362.90234711

Zero-point correction= 0.231979 (Hartree/Particle)

Sum of electronic and thermal Energies= -3362.645288

Sum of electronic and thermal Enthalpies= -3362.644217

Sum of electronic and thermal Free Energies=-3362.731985

**Table S21.** Coordinates and energies for optimized geometry of (Z)-P2

| Center | Atomic | Atomic | Coordinates (Angstroms) |           |           |
|--------|--------|--------|-------------------------|-----------|-----------|
| Number | Number | Type   | X                       | Y         | Z         |
| 1      | 6      | 0      | 2.268586                | 1.008120  | -0.000188 |
| 2      | 6      | 0      | 0.965796                | 1.363048  | -0.000351 |
| 3      | 6      | 0      | 2.784865                | -0.315375 | 0.000251  |
| 4      | 7      | 0      | 3.253098                | -1.382704 | 0.000613  |
| 5      | 1      | 0      | 3.026167                | 1.790282  | -0.000543 |
| 6      | 6      | 0      | -0.250466               | 0.560340  | -0.000173 |
| 7      | 6      | 0      | -1.474871               | 1.249408  | 0.000268  |
| 8      | 6      | 0      | -2.683635               | 0.564985  | 0.000443  |
| 9      | 6      | 0      | -2.690514               | -0.827741 | 0.000120  |
| 10     | 6      | 0      | -1.483572               | -1.526960 | -0.000346 |



|    |   |   |           |           |           |
|----|---|---|-----------|-----------|-----------|
| 11 | 6 | 0 | -0.274237 | -0.844458 | -0.000529 |
| 12 | 1 | 0 | -1.469948 | 2.339656  | 0.000488  |
| 13 | 1 | 0 | -3.620584 | 1.119003  | 0.000850  |
| 14 | 1 | 0 | -3.634578 | -1.369913 | 0.000180  |
| 15 | 1 | 0 | -1.484284 | -2.615315 | -0.000615 |
| 16 | 1 | 0 | 0.652455  | -1.413051 | -0.000963 |
| 17 | 1 | 0 | 0.787382  | 2.440065  | -0.000658 |

---

E(RM06) = -401.601503235

Zero-point correction= 0.132565 (Hartree/Particle)

Sum of electronic and thermal Energies= -401.458578

Sum of electronic and thermal Enthalpies= -401.457507

Sum of electronic and thermal Free Energies= -401.508809

**Table S22.** Coordinates and energies for optimized geometry of ClZnOPO(OMe)<sub>2</sub>

| Center<br>Number | Atomic<br>Number | Atomic<br>Type | Coordinates (Angstroms) |           |           |
|------------------|------------------|----------------|-------------------------|-----------|-----------|
|                  |                  |                | X                       | Y         | Z         |
| 1                | 30               | 0              | 1.367022                | 0.011643  | -0.034332 |
| 2                | 8                | 0              | -0.336047               | 0.147801  | 1.089321  |
| 3                | 15               | 0              | -1.168444               | 0.037953  | -0.199704 |
| 4                | 8                | 0              | -0.168045               | -0.234323 | -1.330059 |
| 5                | 17               | 0              | 3.493622                | 0.158121  | 0.158256  |
| 6                | 8                | 0              | -1.997663               | 1.347475  | -0.526153 |

|    |   |   |           |           |           |
|----|---|---|-----------|-----------|-----------|
| 7  | 6 | 0 | -2.907696 | 1.864499  | 0.453094  |
| 8  | 1 | 0 | -2.390533 | 2.021233  | 1.407290  |
| 9  | 1 | 0 | -3.267251 | 2.819627  | 0.065685  |
| 10 | 1 | 0 | -3.748719 | 1.175392  | 0.586825  |
| 11 | 6 | 0 | -1.963870 | -2.382493 | 0.331322  |
| 12 | 1 | 0 | -2.892071 | -2.956399 | 0.360201  |
| 13 | 1 | 0 | -1.277022 | -2.831565 | -0.396331 |
| 14 | 1 | 0 | -1.504810 | -2.365539 | 1.326431  |
| 15 | 8 | 0 | -2.318967 | -1.056131 | -0.073288 |

---

E(RM06) = -2961.32391280

Zero-point correction= 0.097712 (Hartree/Particle)

Sum of electronic and thermal Energies= -2961.211791

Sum of electronic and thermal Enthalpies= -2961.210720

Sum of electronic and thermal Free Energies= -2961.273210

## References

- 1) For *Gaussian 09*, Revision D.01, M. J. Frisch, G. W. Trucks, H. B. Schlegel, G. E. Scuseria, M. A. Robb, J. R. Cheeseman, G. Scalmani, V. Barone, B. Mennucci, G. A. Petersson, H. Nakatsuji, M. Caricato, X. Li, H. P. Hratchian, A. F. Izmaylov, J. Bloino, G. Zheng, J. L. Sonnenberg, M. Hada, M. Ehara, K. Toyota, R. Fukuda, J. Hasegawa, M. Ishida, T. Nakajima, Y. Honda, O. Kitao, H. Nakai, T. Vreven, J. A. Montgomery, Jr., J. E. Peralta, F. Ogliaro, M. Bearpark, J. J. Heyd, E. Brothers, K. N. Kudin, V. N. Staroverov, T. Keith, R. Kobayashi, J. Normand, K. Raghavachari, A. Rendell, J. C. Burant, S. S. Iyengar, J. Tomasi, M. Cossi, N. Rega, J. M. Millam, M. Klene, J. E. Knox, J. B. Cross, V. Bakken, C. Adamo, J. Jaramillo, R. Gomperts, R. E. Stratmann, O. Yazyev, A. J. Austin, R. Cammi, C. Pomelli, J. W.

Ochterski, R. L. Martin, K. Morokuma, V. G. Zakrzewski, G. A. Voth, P. Salvador, J. J. Dannenberg, S. Dapprich, A. D. Daniels, O.

Farkas, J. B. Foresman, J. V. Ortiz, J. Cioslowski, and D. J. Fox, Gaussian, Inc., Wallingford CT, 2013.

- 2) Y. Zhao and D. G. Truhlar, *Theor. Chem. Acc.* **2008**, *120*: 215.
- 3) A. Schäfer, H. Horn, R. Ahlrichs, *J. Chem. Phys.* **1992**, *97*, 2571.
- 4) For *CYLview* (Ver. 1.0b), C. Y. Legault, Université de Sherbrooke, 2009.
- 5) a) *The Quantum Theory of Atoms in Molecules* (Eds.: C. F. Matta, R. J. Boyd), Wiley-VCH, Weinheim, 2007; b) R. F. W. Bader, *Atoms in Molecules: A Quantum Theory*, Oxford University Press, Oxford, 1990.
- 6) a) R. F. W. Bader, M. E. Stephens, *J. Am. Chem. Soc.* **1975**, *97*, 7391; b) X. Fradera, M. A. Austen, R. F. W. Bader, *J. Phys. Chem. A* **1999**, *103*, 304; c) X. Fradera, J. Poater, S. Simon, M. Duran, M. Sol, *Theor. Chem. Acc.* **2002**, *108*, 214
